# Supplementary material for: BRAF-Inhibitor-Induced Metabolic Alterations in A375 Melanoma Cells
Source: MDPI journal article supplement (doi:10.3390/metabo11110777), 2021-11-14
Supplement: s1 [file s1]

## SUPPLEMENTARY MATERIALS

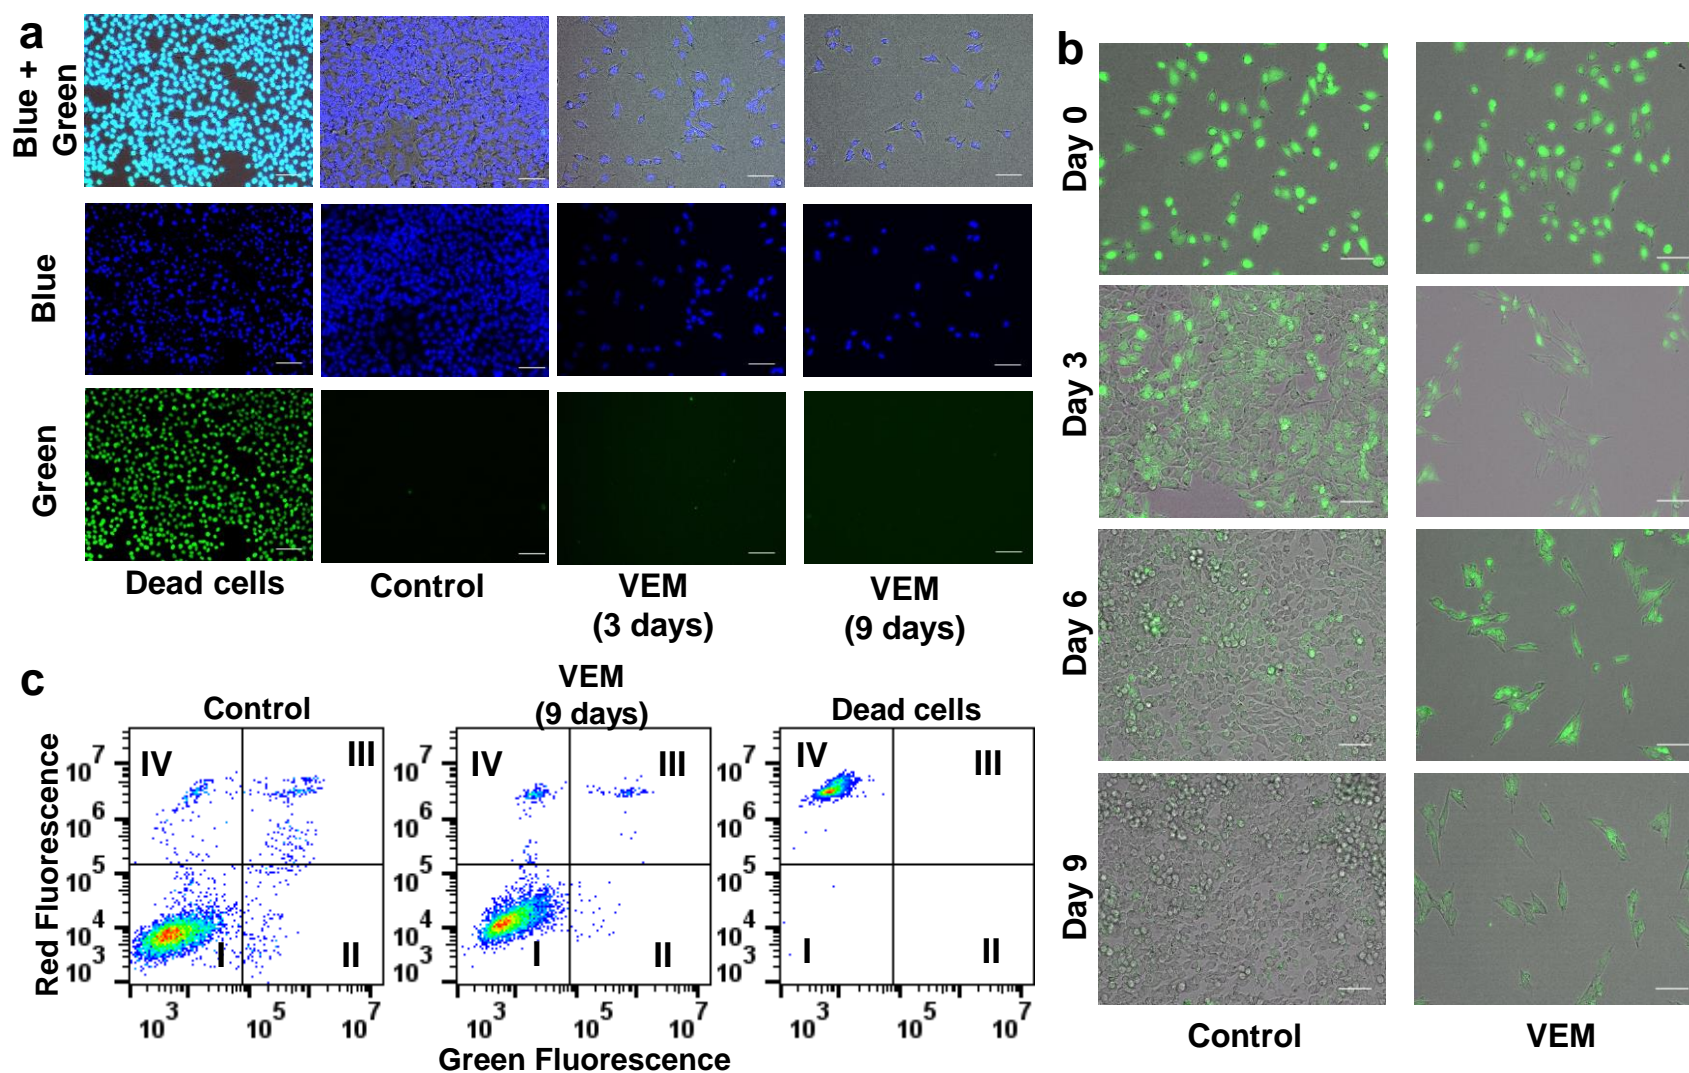

**Figure S1. Effects of VEM treatment on cell viability, morphology and growth.** (a) Cells surviving 3 or 9-day VEM treatment were stained with ReadyProbes Cell Viability Imaging dyes to assess live (blue) and dead (green) cells. Dead cells were generated by treating the cells with 70% ethanol for 30 min. “Control” represents the live cells that did not receive VEM treatment. (b) Cells pre-stained with CFSE dye were treated with VEM or left untreated (control), and their fluorescence intensity was monitored at the indicated time points with fluorescence microscopy. (c) Cells surviving 9-day VEM treatment were stained with annexin-V/FITC conjugate and PI to detect apoptotic cells. Scale bar: 100  $\mu$ m.

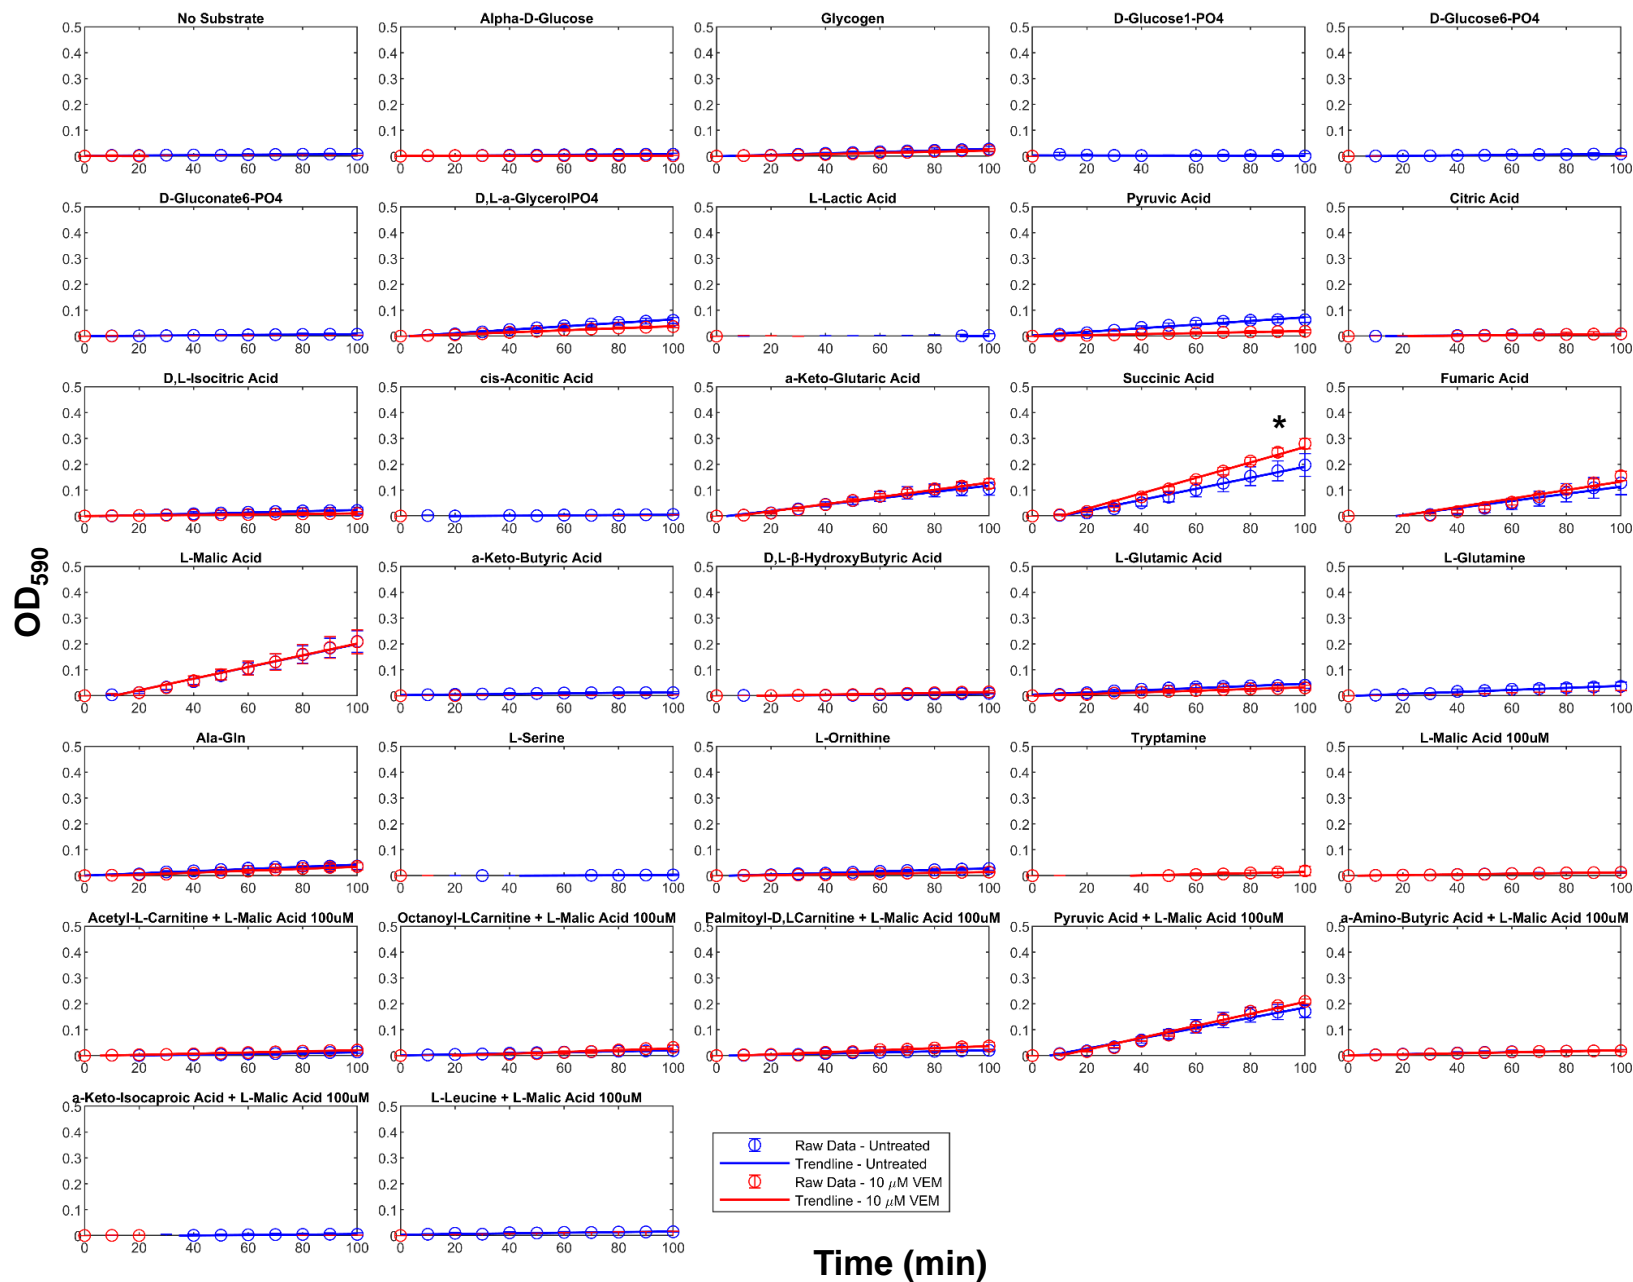

**Figure S2. Mitoplate assays to assess the mitochondrial activities of VEM persister cells.** The consumption rates of substrates were monitored by measuring the OD<sub>590</sub> at the indicated time points. Statistical analysis was performed using a linear regression analysis (F-Statistics, \*P<0.001). N = 4.

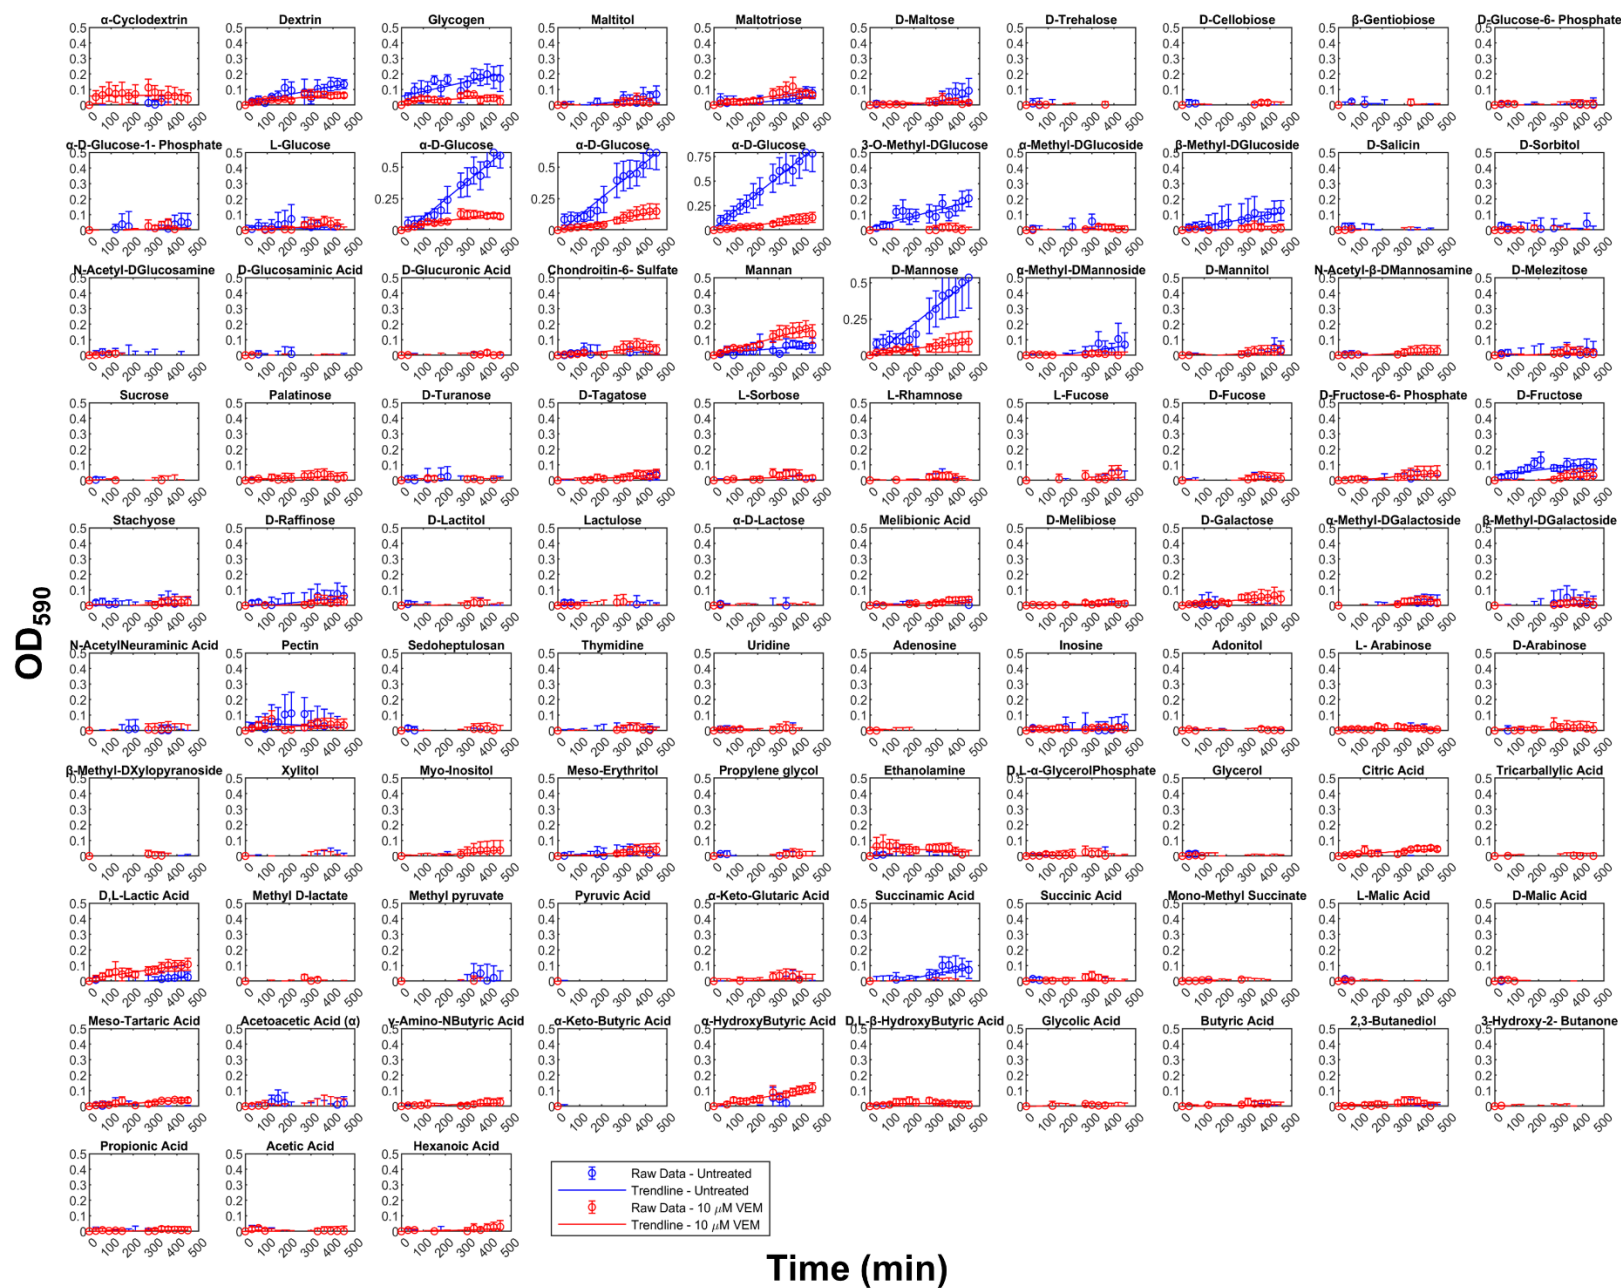

**Figure S3. Phenotype microarray (PM-M1) assays to assess the metabolism of VEM persister cells.** After VEM treatment, cells were transferred to PM-M1 plates with a tetrazolium dye. The consumption rates of substrates were monitored immediately by measuring absorbance (OD<sub>590</sub>). The absorbance data was normalized by using t = 0 h and glutamine control data (see Materials and Methods). N=4.



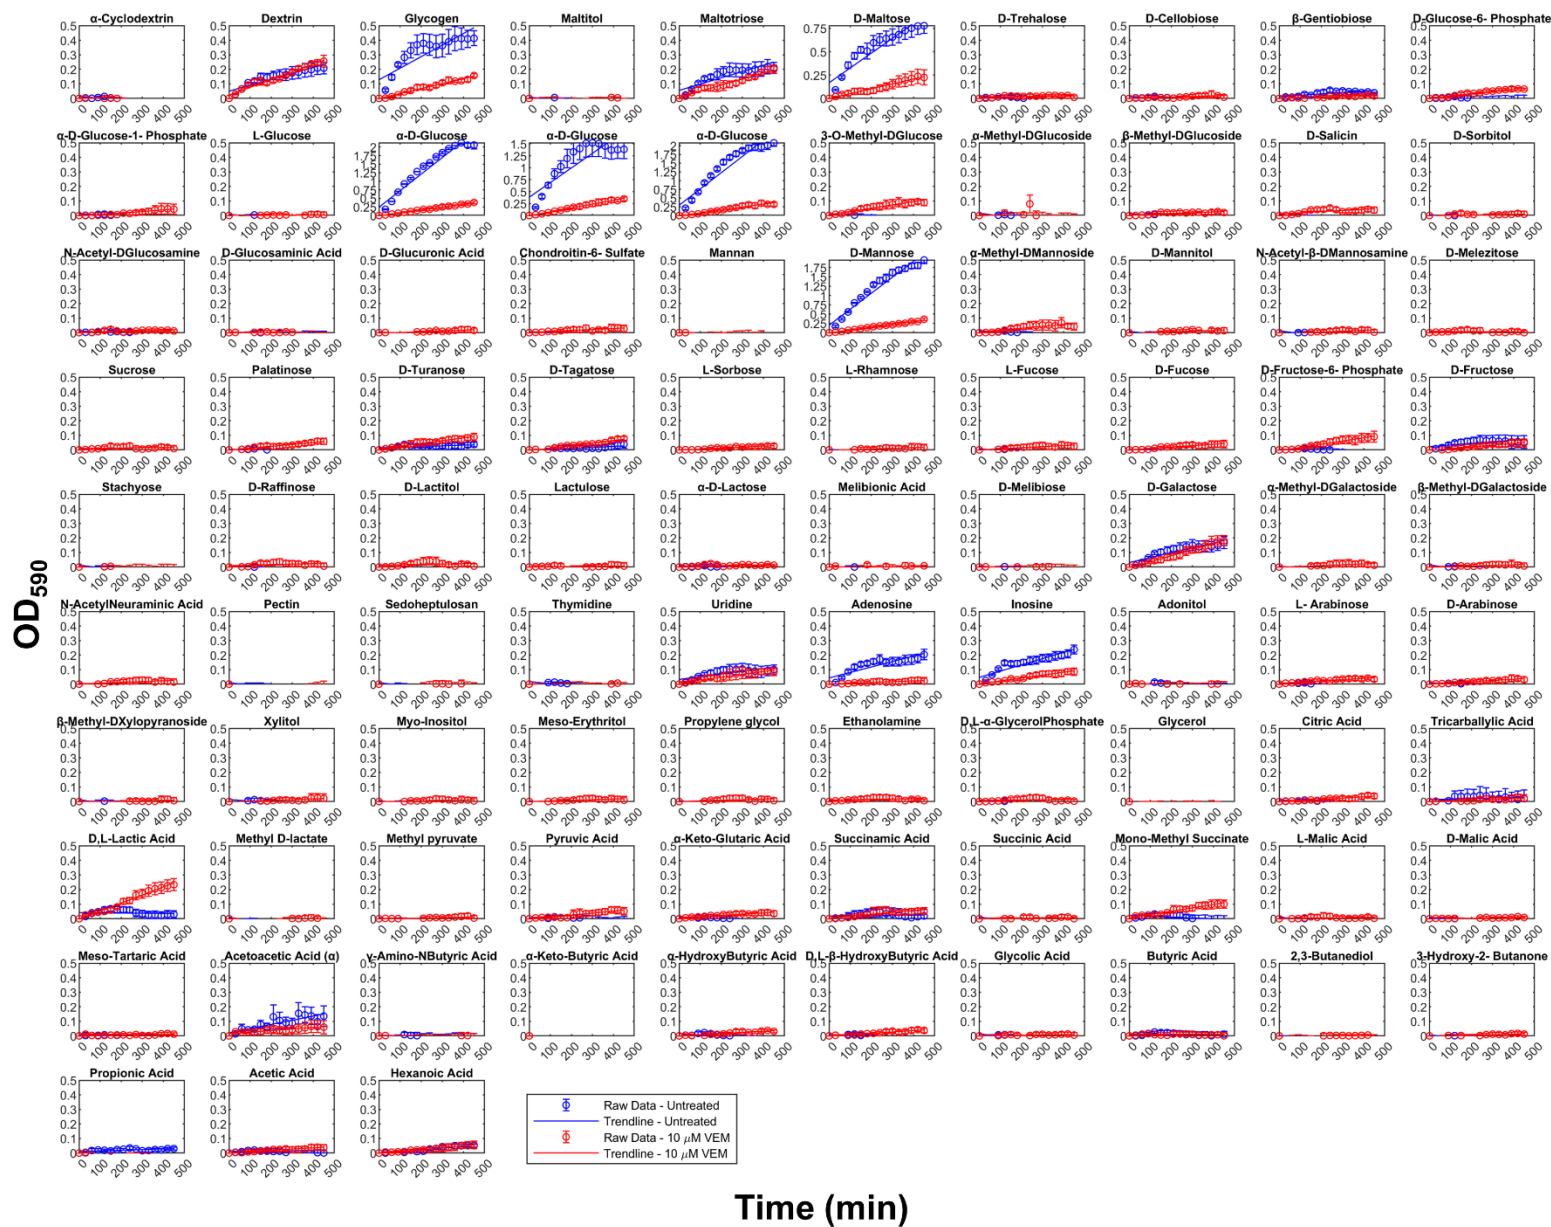

**Figure S4. Phenotype microarray (PM-M1) assays to assess the metabolism of VEM persister cells.** After VEM treatment, cells were transferred to PM-M1 plates. After culturing the cells for 24 h in PM-M1 plates, the tetrazolium dye was added into wells to measure the consumption rates of substrates. The absorbance data was normalized by using  $t = 0$  h and glutamine control data (see Materials and Methods).  $N=4$ .

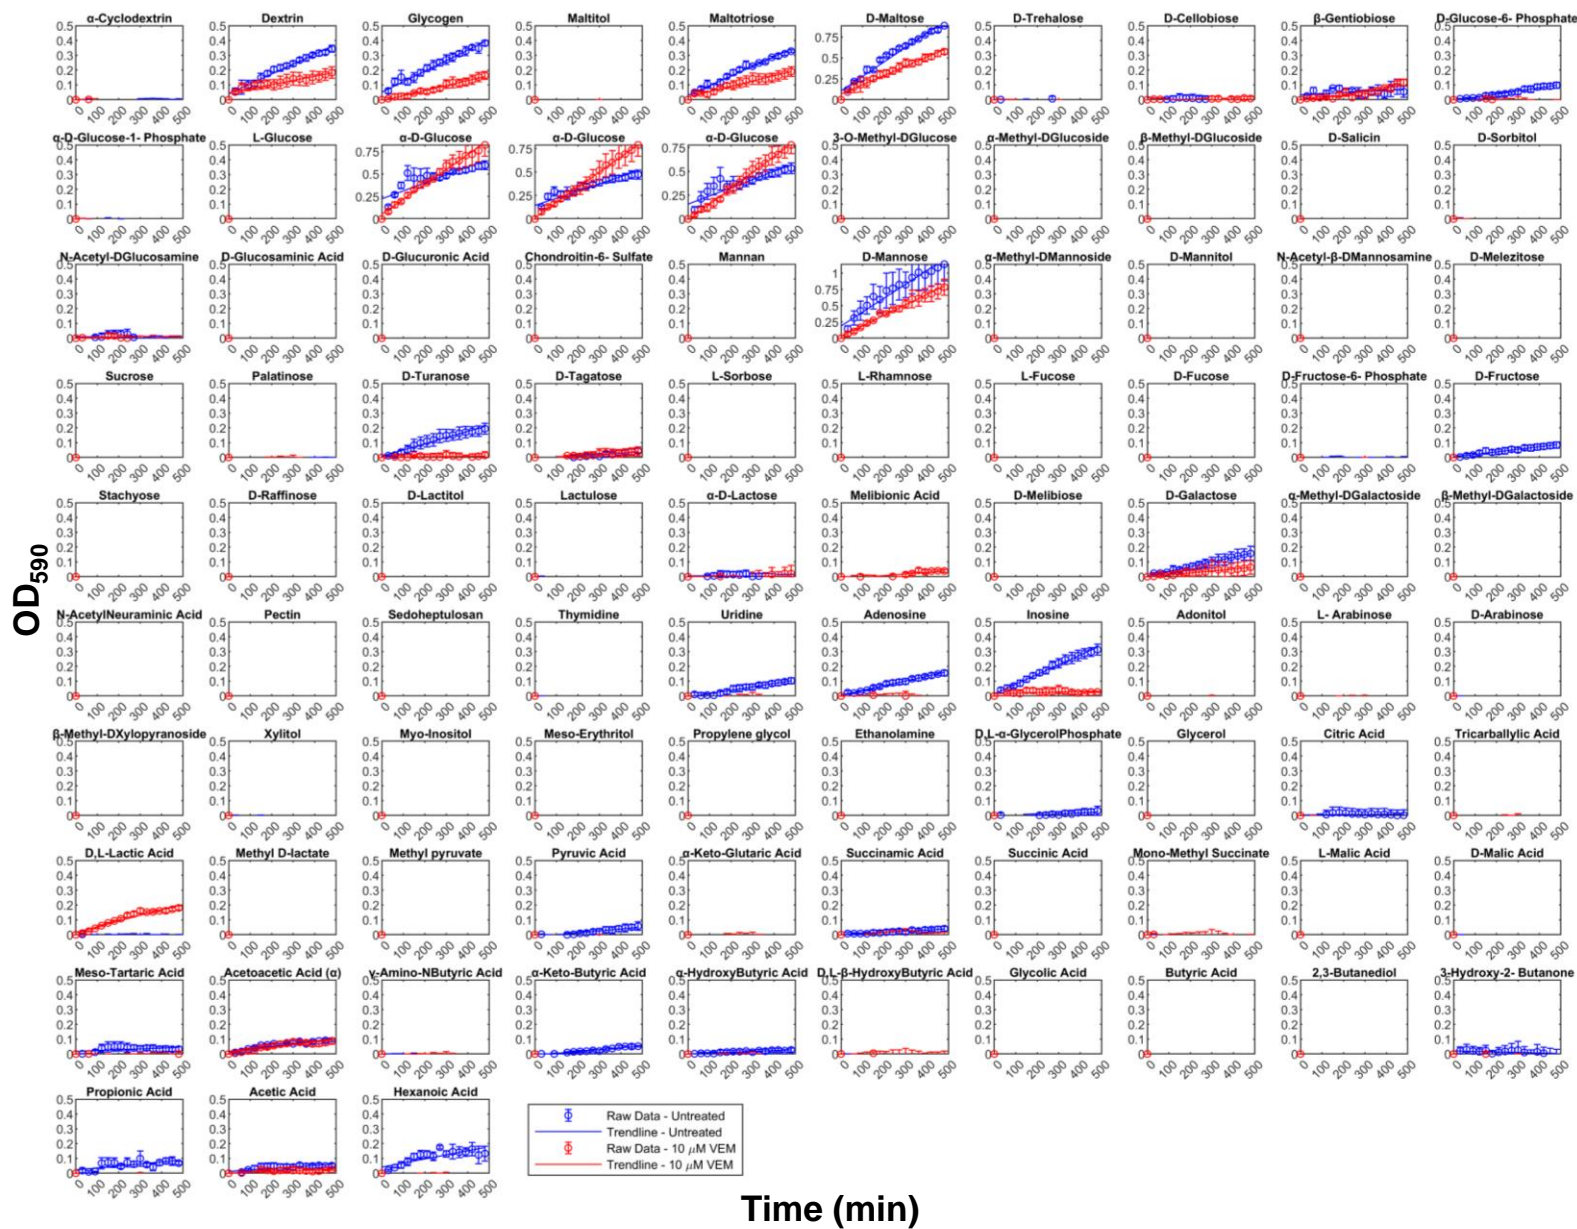

**Figure S5. Phenotype microarray (PM-M1) assays to assess the metabolism of VEM persister cells.** After VEM treatment, cells were transferred to PM-M1 plates. After culturing the cells for 48 h in PM-M1 plates, the tetrazolium dye was added into wells to measure the consumption rates of substrates. The absorbance data was normalized by using  $t = 0$  h and glutamine control data (see Materials and Methods).  $N=4$ .

Table S1: Untargeted metabolomics data.

Cell Line: A375  
Treatment: Vemurafenib (10 μM)  
Tratement duration: 3 days

Note: Values for each sample are normalized by Bradford protein concentration.  
Each biochemical in OrigScale is then rescaled to set the median equal to 1.  
Lastly, missing values are imputed with the minimum.

| BIOCHEMICAL                                          | SUPER PATHWAY          | SUB PATHWAY                                     | Replicate # 1 | Replicate # 2 | Replicate # 3 | Replicate # 4 | Replicate # 1 | Replicate # 2 | Replicate # 3 | Replicate # 4 |
|------------------------------------------------------|------------------------|-------------------------------------------------|---------------|---------------|---------------|---------------|---------------|---------------|---------------|---------------|
|                                                      |                        |                                                 | Control       | Control       | Control       | Control       | VEM           | VEM           | VEM           | VEM           |
| (12 or 13)-methylmyristate (a15:0 or i15:0)          | Lipid                  | Fatty Acid, Branched                            | 0.9872        | 0.6373        | 2.1403        | 0.7917        | 2.0035        | 3.4155        | 2.9013        | 1.8745        |
| (14 or 15)-methylpalmitate (a17:0 or i17:0)          | Lipid                  | Fatty Acid, Branched                            | 0.8489        | 0.5408        | 2.1505        | 0.7658        | 5.9282        | 6.4154        | 4.6998        | 3.1366        |
| (16 or 17)-methylstearate (a19:0 or i19:0)           | Lipid                  | Fatty Acid, Branched                            | 0.6929        | 0.4445        | 2.5214        | 0.6470        | 6.5427        | 4.7666        | 3.2680        | 3.1024        |
| (2 or 3)-decanoate (10:1n7 or n8)                    | Lipid                  | Medium Chain Fatty Acid                         | 1.5010        | 0.7514        | 1.3185        | 0.8458        | 1.0341        | 2.4317        | 1.8112        | 1.0189        |
| (R)-3-hydroxybutyrylcarnitine                        | Lipid                  | Fatty Acid Metabolism (Acyl Carnitine, Hydroxy) | 1.0283        | 1.1996        | 1.3467        | 1.2486        | 1.6371        | 2.0903        | 2.3931        | 1.9925        |
| (S)-3-hydroxybutyrylcarnitine                        | Lipid                  | Fatty Acid Metabolism (Acyl Carnitine, Hydroxy) | 1.0569        | 1.1960        | 1.3675        | 1.0657        | 0.8358        | 1.2554        | 1.1937        | 0.7911        |
| 1,2-dilnoleoyl-GPC (18:2/18:2)                       | Lipid                  | Phosphatidylcholine (PC)                        | 0.7731        | 0.9270        | 0.7049        | 0.9986        | 2.4739        | 1.4221        | 0.8735        | 1.2985        |
| 1,2-dioleoyl-GPC (18:1/18:1)                         | Lipid                  | Phosphatidylcholine (PC)                        | 1.0981        | 1.1041        | 0.9663        | 1.2382        | 2.7407        | 1.6758        | 1.2762        | 1.6951        |
| 1,2-dipalmitoyl-GPC (16:0/16:0)                      | Lipid                  | Phosphatidylcholine (PC)                        | 1.1540        | 1.1160        | 0.8782        | 1.3578        | 2.6438        | 2.4181        | 1.4307        | 1.8010        |
| 1,2-dipalmitoyl-GPE (16:0/16:0)*                     | Lipid                  | Phosphatidylethanolamine (PE)                   | 1.1077        | 1.0222        | 0.9922        | 1.0792        | 2.4091        | 1.4602        | 1.1247        | 1.3867        |
| 1-(1-enyl-oleoyl)-GPE (P-18:1)*                      | Lipid                  | Lysoplasmalogen                                 | 0.2686        | 0.3003        | 0.3224        | 0.3250        | 3.3454        | 1.6686        | 1.2137        | 2.0516        |
| 1-(1-enyl-palmitoyl)-2-arachidonoyl-GPC (P-16:0)     | Lipid                  | Plasmalogen                                     | 0.3434        | 0.2841        | 0.2105        | 0.4890        | 4.6854        | 4.2010        | 3.2717        | 2.8155        |
| 1-(1-enyl-palmitoyl)-2-arachidonoyl-GPE (P-16:0)     | Lipid                  | Plasmalogen                                     | 0.7925        | 0.7918        | 0.7543        | 0.8995        | 3.0192        | 2.3012        | 1.8094        | 1.9057        |
| 1-(1-enyl-palmitoyl)-2-linoleoyl-GPC (P-16:0/18:2)   | Lipid                  | Plasmalogen                                     | 0.9394        | 0.9743        | 0.7511        | 1.0617        | 1.8428        | 0.9365        | 0.6830        | 0.8669        |
| 1-(1-enyl-palmitoyl)-2-linoleoyl-GPE (P-16:0/18:2)   | Lipid                  | Plasmalogen                                     | 0.9501        | 0.7898        | 0.9314        | 0.9925        | 1.8761        | 1.4850        | 1.1739        | 1.1788        |
| 1-(1-enyl-palmitoyl)-2-oleoyl-GPC (P-16:0/18:1)*     | Lipid                  | Plasmalogen                                     | 0.8620        | 0.8599        | 0.7003        | 1.0042        | 2.1446        | 1.2152        | 1.0350        | 1.0945        |
| 1-(1-enyl-palmitoyl)-2-oleoyl-GPE (P-16:0/18:1)*     | Lipid                  | Plasmalogen                                     | 0.9945        | 0.9889        | 0.9960        | 1.0009        | 2.9013        | 1.8072        | 1.4996        | 1.6248        |
| 1-(1-enyl-palmitoyl)-2-palmitoleoyl-GPC (P-16:0)     | Lipid                  | Plasmalogen                                     | 0.9892        | 0.9960        | 0.8380        | 1.0789        | 2.4969        | 1.4388        | 1.2407        | 1.3372        |
| 1-(1-enyl-palmitoyl)-2-palmitoyl-GPC (P-16:0/16)     | Lipid                  | Plasmalogen                                     | 0.8436        | 0.8584        | 0.6985        | 0.9754        | 3.3035        | 2.0615        | 1.4972        | 1.7324        |
| 1-(1-enyl-palmitoyl)-GPC (P-16:0)*                   | Lipid                  | Lysoplasmalogen                                 | 0.4695        | 0.5102        | 0.4150        | 0.5486        | 1.4036        | 1.0257        | 0.6904        | 0.9743        |
| 1-(1-enyl-palmitoyl)-GPE (P-16:0)*                   | Lipid                  | Lysoplasmalogen                                 | 0.3075        | 0.3487        | 0.3090        | 0.3961        | 2.5075        | 1.4166        | 0.9791        | 1.6440        |
| 1-(1-enyl-stearoyl)-2-arachidonoyl-GPE (P-18:0/18:2) | Lipid                  | Plasmalogen                                     | 0.7408        | 0.6999        | 0.6355        | 0.8282        | 4.4859        | 3.4686        | 2.6688        | 2.5749        |
| 1-(1-enyl-stearoyl)-2-oleoyl-GPE (P-18:0/18:1)       | Lipid                  | Plasmalogen                                     | 0.8611        | 0.9735        | 1.1216        | 0.9410        | 3.6244        | 1.7637        | 1.2080        | 1.4569        |
| 1-(1-enyl-stearoyl)-GPC (P-18:0)*                    | Lipid                  | Lysoplasmalogen                                 | 0.3239        | 0.3446        | 0.3008        | 0.4028        | 2.8870        | 1.6746        | 1.2176        | 1.6055        |
| 1-arachidonoyl-GPE (20:4n6)*                         | Lipid                  | Lysophospholipid                                | 0.8067        | 0.6973        | 0.6958        | 0.7896        | 2.3934        | 2.5016        | 2.3263        | 2.8795        |
| 1-arachidonoyl-GPI* (20:4)*                          | Lipid                  | Lysophospholipid                                | 0.1235        | 0.1469        | 0.1646        | 0.3775        | 17.5408       | 29.8161       | 24.9516       | 13.2782       |
| 1-arachidonoylglycerol (20:4)                        | Lipid                  | Monoacylglycerol                                | 0.3884        | 0.1521        | 1.0000        | 0.2430        | 29.4807       | 28.3706       | 17.1630       | 10.8921       |
| 1-carboxyethylisoleucine                             | Amino Acid             | Leucine, Isoleucine and Valine Metabolism       | 1.1564        | 1.2104        | 1.0885        | 1.6534        | 0.1557        | 0.1525        | 0.1904        | 0.2098        |
| 1-carboxyethylleucine                                | Amino Acid             | Leucine, Isoleucine and Valine Metabolism       | 0.7366        | 0.8517        | 0.9463        | 1.3135        | 0.3352        | 0.3755        | 0.4202        | 0.4497        |
| 1-carboxyethylphenylalanine                          | Amino Acid             | Phenylalanine Metabolism                        | 0.9673        | 1.0590        | 1.0361        | 1.5849        | 0.2268        | 0.2426        | 0.2751        | 0.3114        |
| 1-carboxyethyltyrosine                               | Amino Acid             | Tyrosine Metabolism                             | 1.5648        | 1.6182        | 1.4387        | 2.2346        | 0.1389        | 0.1208        | 0.1554        | 0.1771        |
| 1-carboxyethylvaline                                 | Amino Acid             | Leucine, Isoleucine and Valine Metabolism       | 1.2682        | 1.3854        | 1.1128        | 1.9068        | 0.1580        | 0.1744        | 0.2171        | 0.2524        |
| 1-dihomo-linolenylglycerol (20:3)                    | Lipid                  | Monoacylglycerol                                | 0.8102        | 0.4879        | 2.2528        | 0.6453        | 21.9995       | 42.5190       | 22.9848       | 21.6596       |
| 1-docosahexaenoylglycerol (22:6)                     | Lipid                  | Monoacylglycerol                                | 0.6993        | 0.3564        | 2.0420        | 0.5157        | 28.1985       | 25.1518       | 15.1269       | 10.4753       |
| 1-heptadecenoylglycerol (17:1)*                      | Lipid                  | Monoacylglycerol                                | 0.9146        | 0.5832        | 3.6879        | 0.8155        | 9.9348        | 14.2252       | 9.0517        | 4.3745        |
| 1-lignoceryl-GPC (24:0)                              | Lipid                  | Lysophospholipid                                | 0.7718        | 0.9000        | 0.8287        | 1.1046        | 1.6389        | 0.8833        | 0.5988        | 0.9393        |
| 1-linoleoyl-GPE (18:2)*                              | Lipid                  | Lysophospholipid                                | 0.7492        | 0.6766        | 0.8881        | 0.8367        | 1.3112        | 1.0109        | 1.2568        | 1.4848        |
| 1-linoleoylglycerol (18:2)                           | Lipid                  | Monoacylglycerol                                | 0.6498        | 0.5197        | 2.6574        | 0.9443        | 16.2955       | 18.8887       | 12.7364       | 8.2140        |
| 1-margaroylglycerol (17:0)                           | Lipid                  | Monoacylglycerol                                | 0.4692        | 0.5831        | 2.0795        | 0.4023        | 4.8206        | 4.1332        | 4.1162        | 2.9785        |
| 1-methyl-4-imidazoleacetate                          | Amino Acid             | Histidine Metabolism                            | 1.6635        | 1.5544        | 1.5630        | 1.7651        | 1.1863        | 1.6256        | 1.2036        | 0.9010        |
| 1-methyl-5-imidazoleacetate                          | Amino Acid             | Histidine Metabolism                            | 5.5341        | 4.4177        | 4.2957        | 5.0801        | 0.4599        | 0.5563        | 0.4016        | 0.3609        |
| 1-methylguanidine                                    | Amino Acid             | Guanidino and Acetamido Metabolism              | 0.8985        | 0.9799        | 1.0214        | 1.2185        | 0.9879        | 0.9727        | 0.9383        | 1.2309        |
| 1-methylhistidine                                    | Amino Acid             | Histidine Metabolism                            | 0.6743        | 0.7213        | 0.7805        | 1.5792        | 1.2013        | 0.9130        | 1.0199        | 1.1993        |
| 1-methylnicotinamide                                 | Cofactors and Vitamini | Nicotinate and Nicotinamide Metabolism          | 0.7236        | 0.6915        | 0.5317        | 0.8850        | 1.6263        | 1.3549        | 1.0247        | 1.6110        |
| 1-myristoyl-2-arachidonoyl-GPC (14:0/20:4)*          | Lipid                  | Phosphatidylcholine (PC)                        | 0.3564        | 0.4303        | 0.3418        | 0.5106        | 2.6500        | 2.1316        | 1.1673        | 1.6319        |
| 1-myristoyl-2-arachidonoyl-GPC (14:0/16:0)           | Lipid                  | Phosphatidylcholine (PC)                        | 1.1105        | 1.0969        | 0.9403        | 1.2043        | 2.1904        | 1.7664        | 1.1980        | 1.4121        |
| 1-myristoylglycerol (14:0)                           | Lipid                  | Monoacylglycerol                                | 0.8811        | 0.5730        | 2.7784        | 0.6983        | 6.7842        | 7.8367        | 4.9627        | 3.5875        |
| 1-oleoyl-2-arachidonoyl-GPE (18:1/20:4)*             | Lipid                  | Phosphatidylethanolamine (PE)                   | 0.6001        | 0.7539        | 0.5042        | 0.8803        | 3.5000        | 2.8599        | 1.7693        | 2.2317        |
| 1-oleoyl-2-arachidonoyl-GPI (18:1/20:4)*             | Lipid                  | Phosphatidylinositol (PI)                       | 0.6098        | 0.7437        | 0.6006        | 0.9511        | 3.7176        | 2.6361        | 1.1153        | 1.7665        |
| 1-oleoyl-2-docosahexaenoyl-GPC (18:1/22:6)*          | Lipid                  | Phosphatidylcholine (PC)                        | 0.5149        | 0.6095        | 0.4375        | 0.6757        | 2.5936        | 1.4137        | 1.0574        | 1.4396        |
| 1-oleoyl-2-docosahexaenoyl-GPE (18:1/22:6)*          | Lipid                  | Phosphatidylethanolamine (PE)                   | 0.6869        | 0.4700        | 0.5379        | 0.8352        | 4.8383        | 3.8884        | 3.0957        | 3.3158        |
| 1-oleoyl-2-linoleoyl-GPE (18:1/18:2)*                | Lipid                  | Phosphatidylethanolamine (PE)                   | 0.9677        | 0.9744        | 0.9043        | 1.0226        | 1.7094        | 1.2622        | 0.9419        | 1.1500        |
| 1-oleoyl-GPC (18:1)                                  | Lipid                  | Lysophospholipid                                | 0.8046        | 0.7820        | 0.9529        | 0.7526        | 1.5548        | 1.0198        | 0.9802        | 1.6438        |
| 1-oleoyl-GPE (18:1)                                  | Lipid                  | Lysophospholipid                                | 0.4885        | 0.5174        | 0.6302        | 0.6999        | 1.6256        | 1.2535        | 1.3794        | 1.6850        |
| 1-oleoyl-GPG (18:1)*                                 | Lipid                  | Lysophospholipid                                | 0.8773        | 0.7092        | 1.0396        | 0.8156        | 1.2608        | 0.7579        | 1.1984        | 1.0173        |
| 1-oleoyl-GPI (18:1)                                  | Lipid                  | Lysophospholipid                                | 0.4041        | 0.1251        | 0.1708        | 0.6639        | 4.9774        | 2.9408        | 3.2542        | 1.9471        |
| 1-oleoyl-GPS (18:1)                                  | Lipid                  | Lysophospholipid                                | 0.3775        | 0.2736        | 1.8503        | 0.4640        | 2.0329        | 3.9376        | 3.0635        | 2.5320        |
| 1-oleoylglycerol (18:1)                              | Lipid                  | Monoacylglycerol                                | 0.8349        | 0.6859        | 4.5064        | 0.6786        | 14.5853       | 13.0036       | 10.9019       | 8.2433        |
| 1-palmitoleyl-2-linolenoyl-GPC (16:1/18:3)*          | Lipid                  | Phosphatidylcholine (PC)                        | 1.1190        | 1.4501        | 0.9091        | 1.4257        | 0.2179        | 0.2179        | 0.2179        | 0.2179        |
| 1-palmitoleyl-GPC* (16:1)*                           | Lipid                  | Lysophospholipid                                | 0.9794        | 0.9421        | 1.1222        | 0.6810        | 1.0748        | 0.9842        | 0.9130        | 1.0158        |
| 1-palmitoleylglycerol (16:1)*                        | Lipid                  | Monoacylglycerol                                | 0.9502        | 0.4701        | 2.6769        | 0.5898        | 7.6073        | 6.8906        | 4.4148        | 3.2895        |
| 1-palmitoyl-2-arachidonoyl-GPC (16:0/20:4n6)         | Lipid                  | Phosphatidylcholine (PC)                        | 0.3541        | 0.4207        | 0.3010        | 0.5600        | 3.4534        | 2.6834        | 1.5939        | 1.9498        |
| 1-palmitoyl-2-arachidonoyl-GPE (16:0/20:4)*          | Lipid                  | Phosphatidylethanolamine (PE)                   | 0.8372        | 0.8842        | 0.6429        | 1.0496        | 2.2884        | 1.9071        | 1.1561        | 1.4794        |
| 1-palmitoyl-2-arachidonoyl-GPI (16:0/20:4)*          | Lipid                  | Phosphatidylinositol (PI)                       | 0.7026        | 0.6060        | 0.5503        | 0.9312        | 2.2178        | 1.3390        | 0.6403        | 1.0117        |
| 1-palmitoyl-2-docosahexaenoyl-GPC (16:0/22:6)        | Lipid                  | Phosphatidylcholine (PC)                        | 0.3986        | 0.4776        | 0.3243        | 0.6023        | 2.0035        | 1.4031        | 0.8148        | 1.1538        |
| 1-palmitoyl-2-docosahexaenoyl-GPE (16:0/22:6)        | Lipid                  | Phosphatidylethanolamine (PE)                   | 0.6028        | 0.5562        | 0.3517        | 0.7526        | 2.5919        | 2.3663        | 1.5812        | 1.8925        |
| 1-palmitoyl-2-oleoyl-GPC (16:0/18:1)                 | Lipid                  | Phosphatidylcholine (PC)                        | 0.9802        | 0.9440        | 0.8017        | 1.1250        | 2.2457        | 1.8470        | 1.4097        | 1.4980        |
| 1-palmitoyl-2-oleoyl-GPE (16:0/18:1)                 | Lipid                  | Phosphatidylethanolamine (PE)                   | 1.1573        | 1.1737        | 1.0216        | 1.2125        | 1.7209        | 1.1188        | 0.8271        | 1.0479        |
| 1-palmitoyl-2-oleoyl-GPG (16:0/18:1)                 | Lipid                  | Phosphatidylglycerol (PG)                       | 0.8060        | 0.8530        | 0.7874        | 0.9962        | 3.9619        | 1.6982        | 1.0414        | 1.2501        |
| 1-palmitoyl-2-oleoyl-GPI (16:0/18:1)*                | Lipid                  | Phosphatidylinositol (PI)                       | 1.0340        | 0.9681        | 0.6571        | 1.2276        | 1.7240        | 1.4340        | 1.3080        | 1.5110        |
| 1-palmitoyl-2-oleoyl-GPS (16:0/18:1)                 | Lipid                  | Phosphatidylserine (PS)                         | 1.4634        | 1.6037        | 1.2171        | 1.5434        | 1.9063        | 1.2772        | 0.7795        | 1.0692        |
| 1-palmitoyl-2-palmitoleyl-GPC (16:0/16:1)*           | Lipid                  | Phosphatidylcholine (PC)                        | 1.1069        | 1.0976        | 0.9013        | 1.2345        | 2.1468        | 1.5768        | 1.1655        | 1.3879        |
| 1-palmitoyl-2-stearoyl-GPC (16:0/18:0)               | Lipid                  | Phosphatidylcholine (PC)                        | 1.0007        | 1.0906        | 0.8646        | 1.0956        | 1.9458        | 1.4502        | 0.8854        | 1.0196        |
| 1-palmitoyl-GPC (16:0)                               | Lipid                  | Lysophospholipid                                | 0.9335        | 0.8238        | 0.8944        | 0.8545        | 1.3941        | 1.0536        | 0.9774        | 1.4083        |
| 1-palmitoyl-GPE (16:0)                               | Lipid                  | Lysophospholipid                                | 0.7007        | 0.7285        | 0.5739        | 0.8735        | 2.2029        | 0.9736        | 0.6968        | 1.3391        |
| 1-palmitoyl-GPG (16:0)*                              | Lipid                  | Lysophospholipid                                | 1.0526        | 0.6296        | 3.4308        | 0.8493        | 1.7894        | 2.3114        | 2.0670        | 0.6903        |
| 1-palmitoyl-GPI* (16:0)                              | Lipid                  | Lysophospholipid                                | 0.2179        | 0.1758        | 1.0464        | 0.3717        | 4.7409        | 9.7287        | 5.0775        | 3.2304        |
| 1-palmitoyl-GPS (16:0)*                              | Lipid                  | Lysophospholipid                                | 0.6839        | 0.3808        | 3.4393        | 1.1401        | 0.2167        | 0.2167        | 0.9807        | 0.8505        |
| 1-palmitoylglycerol (16:0)                           | Lipid                  | Monoacylglycerol                                | 1.1083        | 0.8917        | 3.2457        | 0.8603        | 3.8770        | 7.0260        | 4.7120        | 3.6888        |
| 1-pentadecanoylglycerol (15:0)                       | Lipid                  | Monoacylglycerol                                | 0.8087        | 0.5401        | 1.6650        | 0.6828        | 5.2804        | 5.8627        | 3.8750        | 2.7799        |
| 1-ribosyl-imidazoleacetate*                          | Amino Acid             | Histidine Metabolism                            | 1.7135        | 1.6602        | 1.9586        | 1.8680        | 0.9047        | 1.0000        | 0.6573        | 0.4197        |
| 1-stearoyl-2-arachidonoyl-GPC (18:0/20:4)            | Lipid                  | Phosphatidylcholine (PC)                        | 0.3469        | 0.3986        | 0.2919        | 0.5296        | 5.7498        | 4.9142        | 3.0871        | 3.4820        |
| 1-stearoyl-2-arachidonoyl-GPE (18:0/20:4)            | Lipid                  | Phosphatidylethanolamine (PE)                   | 0.8128        | 0.8637        | 0.7190        | 1.0093        | 3.6940        | 3.0643        | 2.2173        | 2.3761        |
| 1-stearoyl-2-arachidonoyl-GPI (18:0/20:4)            | Lipid                  | Phosphatidylinositol (PI)                       | 0.9796        | 0.7785        | 0.7107        | 0.9088        | 5.5927        | 3.1424        | 2.0567        | 2.0064        |
| 1-stearoyl-2-arachidonoyl-GPS (18:0/20:4)            | Lipid                  | Phosphatidylserine (PS)                         | 0.7819        | 0.9437        | 0.5854        | 0.9709        | 3.4459        | 2.9971        | 1.6757        | 1.7231        |
| 1-stearoyl-2-docosahexaenoyl-GPC (18:0/22:6)         | Lipid                  | Phosphatidylcholine (PC)                        | 0.3976        | 0.4312        | 0.3090        | 0.6203        | 3.2575        | 2.5354        | 1.6735        | 2.0783        |
| 1-stearoyl-2-linoleoyl-GPC (18:0/18:2)*              | Lipid                  | Phosphatidylcholine (PC)                        | 0.9222        | 0.9739        | 0.9819        | 1.0821        | 2.2526        | 2.3737        | 2.3084        | 1.6391        |
| 1-stearoyl-2-oleoyl-GPC (18:0/18:1)                  | Lipid                  | Phosphatidylcholine (PC)                        | 0.8880        | 0.9658        | 0.8406        | 0.9856        | 2.8819        | 1.9726        | 1.5329        | 1.6641        |
| 1-stearoyl-2-oleoyl-GPE (18:0/18:1)                  | Lipid                  |                                                 |               |               |               |               |               |               |               |               |

|                                               |                      |                                                         |        |        |          |         |         |         |         |         |
|-----------------------------------------------|----------------------|---------------------------------------------------------|--------|--------|----------|---------|---------|---------|---------|---------|
| dCMP                                          | Nucleotide           | Pyrimidine Metabolism, Cytidine containing              | 2.1061 | 2.1812 | 1.7576   | 1.5396  | 0.3606  | 0.3073  | 0.3304  | 0.4158  |
| 2'-deoxyguanosine                             | Nucleotide           | Purine Metabolism, Guanine containing                   | 2.5268 | 2.9952 | 2.9637   | 3.8479  | 2.5717  | 1.2340  | 0.8986  | 1.1602  |
| 2'-deoxyinosine                               | Nucleotide           | Purine Metabolism, (Hypo)Xanthine/Inosine containing    | 5.7718 | 7.3468 | 5.0753   | 12.3254 | 2.6425  | 0.9614  | 0.8393  | 1.2136  |
| 2'-deoxyuridine                               | Nucleotide           | Pyrimidine Metabolism, Uracil containing                | 0.2312 | 0.2068 | 0.1311   | 0.4746  | 1.5254  | 1.5457  | 2.4033  | 2.6309  |
| 2'-O-methylcytidine                           | Nucleotide           | Pyrimidine Metabolism, Cytidine containing              | 0.5675 | 0.4122 | 0.5219   | 0.7028  | 3.3179  | 3.6107  | 3.8081  | 3.3485  |
| 2'-O-methyluridine                            | Nucleotide           | Pyrimidine Metabolism, Uracil containing                | 1.1596 | 0.7290 | 0.7278   | 0.7904  | 1.9525  | 1.3511  | 1.7084  | 1.5856  |
| 2,3-dihydroxy-2-methylbutyrate                | Amino Acid           | Leucine, Isoleucine and Valine Metabolism               | 2.0518 | 1.8503 | 1.4280   | 2.1823  | 0.6437  | 0.5185  | 0.7604  | 0.6771  |
| 2,3-dihydroxy-5-methylthio-4-pentenoate [DMT] | Amino Acid           | Methionine, Cysteine, SAM and Taurine Metabolism        | 1.0000 | 0.9443 | 1.0370   | 1.0596  | 0.5769  | 0.7504  | 0.5769  | 0.5769  |
| 2,4-di-tert-butylphenol                       | Xenobiotics          | Chemical                                                | 0.4679 | 0.4541 | 3.9864   | 0.5762  | 1.8904  | 2.5566  | 1.6842  | 0.9211  |
| 2,4-dihydroxybutyrate                         | Lipid                | Fatty Acid, Dihydroxy                                   | 1.1263 | 0.9791 | 0.9501   | 1.5699  | 0.3641  | 0.5081  | 0.4586  | 0.4621  |
| 2-aminoadipate                                | Amino Acid           | Lysine Metabolism                                       | 0.5295 | 0.4812 | 0.3698   | 0.7172  | 1.1943  | 0.8205  | 1.9074  | 0.8906  |
| 2-aminophenol sulfate                         | Xenobiotics          | Food Component/Plant                                    | 1.6772 | 1.2213 | 1.6050   | 0.9073  | 0.3812  | 0.3812  | 0.3812  | 0.3812  |
| 2-arachidonoylglycerol (20:4)                 | Lipid                | Monoacylglycerol                                        | 0.4169 | 0.0864 | 1.2132   | 0.2720  | 26.9431 | 21.7098 | 11.1317 | 10.0085 |
| 2-docosahexaenoylglycerol (22:6)*             | Lipid                | Monoacylglycerol                                        | 0.3370 | 0.2588 | 1.6058   | 0.2700  | 19.2641 | 11.4239 | 6.5059  | 7.2151  |
| 2-heptadecenoylglycerol (17:1)*               | Lipid                | Monoacylglycerol                                        | 0.4782 | 0.3448 | 2.0208   | 0.5269  | 8.6654  | 8.6237  | 5.3742  | 4.1417  |
| 2-hydroxy-3-methylvalerate                    | Amino Acid           | Leucine, Isoleucine and Valine Metabolism               | 1.5176 | 1.1565 | 0.8963   | 1.1661  | 0.4538  | 0.4538  | 0.4538  | 0.4538  |
| 2-hydroxyadipate                              | Lipid                | Fatty Acid, Dicarboxylate                               | 1.0000 | 0.3681 | 0.2657   | 0.9913  | 0.4074  | 0.2657  | 0.5682  | 0.4774  |
| 2-hydroxybutyrate/2-hydroxyisobutyrate        | Amino Acid           | Glutathione Metabolism                                  | 1.2161 | 0.9911 | 1.1309   | 1.0015  | 0.7957  | 0.7957  | 0.7957  | 0.7957  |
| 2-hydroxyglutarate                            | Lipid                | Fatty Acid, Dicarboxylate                               | 1.7031 | 1.0844 | 1.3360   | 1.7343  | 0.8532  | 0.8605  | 0.9156  | 0.5723  |
| 2-hydroxypalmitate                            | Lipid                | Fatty Acid, Monohydroxy                                 | 0.8915 | 0.5664 | 2.2120   | 0.6759  | 3.5607  | 3.8700  | 2.5171  | 2.4735  |
| 2-hydroxystearate                             | Lipid                | Fatty Acid, Monohydroxy                                 | 0.7579 | 0.5723 | 2.1565   | 0.7677  | 2.8325  | 4.6824  | 3.3692  | 3.0452  |
| 2-linoleoylglycerol (18:2)                    | Lipid                | Monoacylglycerol                                        | 0.5040 | 0.2970 | 1.9601   | 0.4415  | 14.4387 | 15.9136 | 8.4740  | 7.4274  |
| 2-methylbutyrylcarnitine (C5)                 | Amino Acid           | Leucine, Isoleucine and Valine Metabolism               | 1.0123 | 0.9239 | 1.1245   | 0.9434  | 1.6500  | 1.5512  | 1.1629  | 1.7910  |
| 2-methylbutyrylglycine (C5)                   | Amino Acid           | Leucine, Isoleucine and Valine Metabolism               | 1.5697 | 0.9724 | 1.4368   | 0.9628  | 0.7010  | 1.5938  | 0.7010  | 0.7010  |
| 2-methylcitrate/homocitrate                   | Energy               | TCA Cycle                                               | 0.7437 | 0.6362 | 0.8264   | 1.0430  | 2.2162  | 2.2817  | 1.9204  | 2.2556  |
| 2-myristoylglycerol (14:0)                    | Lipid                | Monoacylglycerol                                        | 0.9660 | 0.4448 | 2.4451   | 0.6064  | 5.4644  | 6.3622  | 3.7620  | 3.2396  |
| 2-O-methylascorbic acid                       | Cofactors and Vitami | Ascorbate and Aldarate Metabolism                       | 0.9285 | 0.8302 | 0.8445   | 0.9710  | 1.8284  | 1.6664  | 1.5526  | 1.6379  |
| 2-oleoylglycerol (18:1)                       | Lipid                | Monoacylglycerol                                        | 0.7761 | 0.5266 | 4.5149   | 0.6114  | 9.8128  | 13.7737 | 8.2068  | 9.7065  |
| 2-oxoarginine*                                | Amino Acid           | Urea cycle; Arginine and Proline Metabolism             | 0.9094 | 0.9901 | 0.6939   | 1.0011  | 0.9989  | 1.3314  | 1.1601  | 1.0124  |
| 2-palmitoleyl-GPC* (16:1)*                    | Lipid                | Lysophospholipid                                        | 1.0048 | 1.0368 | 1.1819   | 1.0019  | 0.9505  | 0.9837  | 0.7397  | 1.1346  |
| 2-palmitoleylglycerol (16:1)*                 | Lipid                | Monoacylglycerol                                        | 0.7090 | 0.3732 | 2.8061   | 0.4324  | 7.2502  | 6.7039  | 3.9828  | 4.2001  |
| 2-palmitoyl-GPC* (16:0)*                      | Lipid                | Lysophospholipid                                        | 0.6081 | 0.4435 | 2.4994   | 0.5472  | 1.6233  | 3.4881  | 2.1880  | 1.6269  |
| 2-palmitoylglycerol (16:0)                    | Lipid                | Monoacylglycerol                                        | 0.9291 | 0.6408 | 2.9088   | 0.7818  | 0.1209  | 9.2692  | 5.2674  | 4.5845  |
| 2-stearoyl-GPE (18:0)*                        | Lipid                | Lysophospholipid                                        | 0.4014 | 0.5156 | 2.3316   | 0.8965  | 1.8857  | 6.3449  | 3.9840  | 1.8860  |
| 2R,3R-dihydroxybutyrate                       | Lipid                | Fatty Acid, Dihydroxy                                   | 1.5266 | 1.3386 | 1.0149   | 1.3231  | 0.8315  | 0.9851  | 0.4512  | 0.9274  |
| 2S,3R-dihydroxybutyrate                       | Lipid                | Fatty Acid, Dihydroxy                                   | 1.3224 | 0.5285 | 0.5285   | 1.9720  | 0.5285  | 0.5285  | 0.5285  | 0.8857  |
| 3'-dephosphocoenzyme A                        | Cofactors and Vitami | Pantothenate and CoA Metabolism                         | 0.4325 | 0.2690 | 0.5376   | 0.9654  | 0.8890  | 0.7385  | 1.0346  | 1.6224  |
| 3-(3-amino-3-carboxypropyl)uridine*           | Nucleotide           | Pyrimidine Metabolism, Uracil containing                | 1.0831 | 1.0439 | 1.2818   | 1.1657  | 1.0489  | 0.8006  | 0.7832  | 0.9296  |
| 3-(4-hydroxyphenyl)lactate (HPLA)             | Amino Acid           | Tyrosine Metabolism                                     | 1.3108 | 1.1546 | 1.1151   | 1.4830  | 0.3608  | 0.3190  | 0.3863  | 0.3772  |
| 3-amino-2-piperidone                          | Amino Acid           | Urea cycle; Arginine and Proline Metabolism             | 0.3002 | 0.2911 | 0.2303   | 0.7418  | 2.1184  | 1.6728  | 0.9961  | 1.5840  |
| 3-aminoisobutyrate                            | Nucleotide           | Pyrimidine Metabolism, Thymine containing               | 0.9345 | 0.6166 | 1.2740   | 0.6812  | 1.9701  | 2.2721  | 1.8488  | 1.9929  |
| 3-formylindole                                | Xenobiotics          | Food Component/Plant                                    | 0.5614 | 0.5223 | 0.9174   | 1.0749  | 1.2705  | 0.9927  | 1.4405  | 1.2361  |
| 3-hydroxy-2-ethylpropionate                   | Amino Acid           | Leucine, Isoleucine and Valine Metabolism               | 1.6832 | 0.7540 | 0.7540   | 0.8761  | 0.8596  | 0.7540  | 0.7540  | 1.6687  |
| 3-hydroxy-3-methylglutarate                   | Lipid                | Mevalonate Metabolism                                   | 3.3635 | 3.3011 | 3.4380   | 2.8242  | 0.7138  | 0.7306  | 0.6726  | 0.7042  |
| 3-hydroxyadipate*                             | Lipid                | Fatty Acid, Dicarboxylate                               | 1.0428 | 0.3764 | 0.6139   | 1.0779  | 1.0210  | 1.1020  | 0.9847  | 0.8774  |
| 3-hydroxybutyrate (BHBA)                      | Lipid                | Ketone Bodies                                           | 1.1843 | 0.9548 | 0.9181   | 1.0336  | 1.5645  | 1.6042  | 2.1352  | 1.1493  |
| 3-hydroxydecanoate                            | Lipid                | Fatty Acid, Monohydroxy                                 | 0.5520 | 0.6477 | 1.2639   | 0.8909  | 1.0263  | 0.8457  | 1.5944  | 0.5826  |
| 3-hydroxydecanoylcarnitine                    | Lipid                | Fatty Acid Metabolism (Acyl Carnitine, Hydroxy)         | 0.3172 | 0.5344 | 1.1678   | 0.6107  | 1.1364  | 1.1163  | 1.4833  | 0.8593  |
| 3-hydroxyhexanoate                            | Lipid                | Fatty Acid, Monohydroxy                                 | 0.6373 | 0.7884 | 1.7539   | 0.9975  | 1.0025  | 0.8666  | 1.8741  | 0.4610  |
| 3-hydroxyhexanoylcarnitine (1)                | Lipid                | Fatty Acid Metabolism (Acyl Carnitine, Hydroxy)         | 0.5858 | 0.6943 | 0.9914   | 0.9667  | 2.3830  | 2.9522  | 2.7891  | 2.9184  |
| 3-hydroxyhippurate                            | Xenobiotics          | Benzoate Metabolism                                     | 0.5935 | 0.5935 | 0.5935   | 0.5935  | 2.6507  | 3.8589  | 0.5935  | 1.7323  |
| 3-hydroxyisobutyrate                          | Amino Acid           | Leucine, Isoleucine and Valine Metabolism               | 0.9392 | 0.8078 | 0.6600   | 1.1961  | 0.8384  | 0.9451  | 0.6131  | 1.0549  |
| 3-hydroxylaurate                              | Lipid                | Fatty Acid, Monohydroxy                                 | 0.6992 | 0.6644 | 1.3339   | 0.9391  | 1.0114  | 0.8036  | 1.4914  | 0.7121  |
| 3-hydroxymyristate                            | Lipid                | Fatty Acid, Monohydroxy                                 | 1.0669 | 0.6018 | 1.8181   | 0.8131  | 1.8846  | 1.7954  | 1.9655  | 0.8690  |
| 3-hydroxyoctanoate                            | Lipid                | Fatty Acid, Monohydroxy                                 | 0.5141 | 0.6129 | 1.6960   | 0.9371  | 0.9120  | 0.8028  | 1.6274  | 0.4622  |
| 3-hydroxyoleate*                              | Lipid                | Fatty Acid, Monohydroxy                                 | 0.7839 | 0.3596 | 1.9096   | 0.5405  | 5.3042  | 4.3858  | 3.1736  | 1.9023  |
| 3-hydroxyoleylcarnitine                       | Lipid                | Fatty Acid Metabolism (Acyl Carnitine, Hydroxy)         | 0.6447 | 0.6885 | 0.9387   | 0.9810  | 1.5732  | 1.0190  | 0.5919  | 1.0588  |
| 3-hydroxypalmitate                            | Lipid                | Fatty Acid, Monohydroxy                                 | 1.0220 | 0.5292 | 2.4336   | 0.7386  | 3.7982  | 2.4854  | 3.1278  | 0.9780  |
| 3-hydroxypalmitoylcarnitine                   | Lipid                | Fatty Acid Metabolism (Acyl Carnitine, Hydroxy)         | 0.6729 | 1.0579 | 1.6510   | 1.1609  | 0.9421  | 0.6949  | 0.5210  | 0.6079  |
| 3-hydroxystearate                             | Lipid                | Fatty Acid, Monohydroxy                                 | 0.7620 | 0.5893 | 2.5248   | 0.8143  | 1.9910  | 2.9248  | 3.3408  | 1.0884  |
| 3-hydroxytridecanoate                         | Lipid                | Fatty Acid, Monohydroxy                                 | 0.9920 | 0.7157 | 1.8275   | 0.8672  | 3.3885  | 3.6771  | 2.6737  | 1.7588  |
| 3-ketosphinganine                             | Lipid                | Sphingolipid Synthesis                                  | 0.4620 | 0.5059 | 0.4166   | 0.4166  | 0.4166  | 0.4166  | 0.4166  | 0.4166  |
| 3-methoxytyrosine                             | Amino Acid           | Tyrosine Metabolism                                     | 1.0126 | 0.4488 | 0.6368   | 0.9874  | 0.4488  | 0.4488  | 0.6834  | 0.5346  |
| 3-methyl-2-oxobutyrate                        | Amino Acid           | Leucine, Isoleucine and Valine Metabolism               | 2.4941 | 2.2825 | 3.1301   | 0.9438  | 0.8037  | 1.0292  | 1.3066  | 0.8037  |
| 3-methyl-2-oxovalerate                        | Amino Acid           | Leucine, Isoleucine and Valine Metabolism               | 2.1442 | 2.6178 | 3.1915   | 0.7993  | 0.7470  | 1.2053  | 0.9025  | 1.7470  |
| 3-methylcytidine                              | Nucleotide           | Pyrimidine Metabolism, Cytidine containing              | 0.3583 | 0.3638 | 0.5305   | 0.5751  | 2.0983  | 2.2288  | 1.9744  | 2.1460  |
| 3-methylglutaconate                           | Amino Acid           | Leucine, Isoleucine and Valine Metabolism               | 1.0087 | 0.8351 | 1.0548   | 0.8895  | 0.9913  | 1.0542  | 0.8760  | 1.1653  |
| 3-methylhistidine                             | Amino Acid           | Histidine Metabolism                                    | 0.7012 | 0.7986 | 0.7769   | 0.8550  | 0.1660  | 0.4881  | 0.2748  | 0.3230  |
| 3-phosphoglycerate                            | Carbohydrate         | Glycolysis, Gluconeogenesis, and Pyruvate Metabolism    | 1.4278 | 0.7555 | 0.8553   | 1.5989  | 0.6773  | 0.5634  | 1.4911  | 1.4691  |
| 3-ureidopropionate                            | Nucleotide           | Pyrimidine Metabolism, Uracil containing                | 2.5390 | 1.8100 | 2.0242   | 1.9842  | 0.9376  | 1.2218  | 1.0126  | 0.9112  |
| 4-acetamidobutanate                           | Amino Acid           | Polyamine Metabolism                                    | 1.1438 | 1.0167 | 0.9833   | 1.0904  | 1.6885  | 1.6125  | 1.5244  | 1.3215  |
| 4-chlorobenzoic acid                          | Xenobiotics          | Chemical                                                | 0.7798 | 1.0221 | 1.0131   | 0.7229  | 3.1486  | 1.5793  | 2.2814  | 0.7229  |
| 4-cholesten-3-one                             | Lipid                | Sterol                                                  | 0.7594 | 0.6365 | 0.6365   | 0.9270  | 2.7598  | 0.6365  | 0.8407  | 0.6365  |
| 4-guanidinobutanate                           | Amino Acid           | Guanidino and Acetamido Metabolism                      | 2.6800 | 2.4216 | 2.6050   | 2.4652  | 0.6044  | 0.7115  | 0.7069  | 0.7164  |
| 4-hydroxy-nonenal-glutathione                 | Amino Acid           | Glutathione Metabolism                                  | 1.6230 | 0.9610 | 0.9192   | 1.3324  | 3.2859  | 2.4351  | 2.1180  | 2.3419  |
| 4-hydroxybutyrate (GHB)                       | Lipid                | Fatty Acid, Monohydroxy                                 | 0.8246 | 0.7035 | 0.7976   | 1.0043  | 0.8321  | 0.6521  | 0.6521  | 0.6521  |
| 4-hydroxyglutamate                            | Amino Acid           | Glutamate Metabolism                                    | 3.3340 | 3.2436 | 3.0458   | 3.2680  | 0.7827  | 0.7827  | 0.7827  | 0.7827  |
| 4-hydroxyphenylpyruvate                       | Amino Acid           | Tyrosine Metabolism                                     | 0.8218 | 0.8179 | 0.6291   | 0.9948  | 1.9259  | 1.3622  | 1.9811  | 2.0488  |
| 4-imidazoleacetate                            | Amino Acid           | Histidine Metabolism                                    | 2.4020 | 1.9383 | 1.6982   | 2.0930  | 0.7281  | 0.4980  | 0.6290  | 0.3443  |
| 4-methyl-2-oxopentanoate                      | Amino Acid           | Leucine, Isoleucine and Valine Metabolism               | 2.0700 | 1.9009 | 2.6749   | 1.7823  | 0.5982  | 1.3052  | 1.1251  | 0.9202  |
| 4-methylcatechol sulfate                      | Xenobiotics          | Benzoate Metabolism                                     | 0.5501 | 0.5458 | 0.5584   | 0.8402  | 1.7192  | 2.3615  | 2.3209  | 1.6896  |
| 5,6-dihydrothymine                            | Nucleotide           | Pyrimidine Metabolism, Thymine containing               | 1.0663 | 0.9064 | 0.9556   | 1.0444  | 0.9064  | 0.9064  | 0.9064  | 0.9064  |
| 5,6-dihydrouridine                            | Nucleotide           | Pyrimidine Metabolism, Uracil containing                | 0.5755 | 0.5808 | 0.6808   | 0.7020  | 1.4603  | 1.5604  | 1.5183  | 1.8522  |
| 5-[2-Hydroxyethyl]-4-methylthiazole           | Cofactors and Vitami | Thiamine Metabolism                                     | 0.2902 | 0.2935 | 0.3336   | 0.4953  | 1.0007  | 1.2443  | 1.3205  | 1.4474  |
| 5-(galactosylhydroxy)-L-lysine                | Amino Acid           | Lysine Metabolism                                       | 0.3670 | 0.3431 | 0.4088   | 0.4634  | 1.7212  | 1.7427  | 1.2454  | 1.9299  |
| 5-aminovalerate                               | Amino Acid           | Lysine Metabolism                                       | 1.5189 | 1.4575 | 1.8022   | 1.4142  | 0.4591  | 0.7022  | 0.6140  | 0.6186  |
| 5-dodecanoate (12:1n7)                        | Lipid                | Medium Chain Fatty Acid                                 | 0.9560 | 0.8782 | 1.8899   | 1.0440  | 0.7292  | 0.7769  | 1.0647  | 0.4882  |
| 5-dodecenoylcarnitine (C12:1)                 | Lipid                | Fatty Acid Metabolism (Acyl Carnitine, Monounsaturated) | 1.2181 | 1.3585 | 2.1509   | 0.8334  | 0.6478  | 1.3671  | 1.0165  | 0.8391  |
| 5-hydroxylsine                                | Amino Acid           | Lysine Metabolism                                       | 0.4087 | 0.6067 | 0.8819   | 0.4915  | 1.5217  | 1.8320  | 0.9508  | 1.2857  |
| 5-methylcytidine                              | Nucleotide           | Pyrimidine Metabolism, Cytidine containing              | 1.3225 | 0.9999 | 1.0001   | 1.0158  | 1.1027  | 1.2667  | 1.3876  | 1.1029  |
| 5-methyltetrahydrofolate (5MeTHF)             | Cofactors and Vitami | Folate Metabolism                                       | 1.7370 | 2.1028 | 2.7831   | 1.8764  | 0.5395  | 0.7349  | 0.8369  | 0.8228  |
| 5-methylthioadenosine (MTA)                   | Amino Acid           | Polyamine Metabolism                                    | 1.0739 | 1.0085 | 0.8668   | 1.1989  | 0.7642  | 0.9634  | 0.8654  | 0.8422  |
| 5-methyluridine (ribothymidine)               | Nucleotide           | Pyrimidine Metabolism, Uracil containing                | 2.2493 | 1.7425 | 1.3703   | 1.3505  | 1.0325  | 0.8990  | 0.8738  | 0.3461  |
| 5-oxoproline                                  | Amino Acid           | Glutathione Metabolism                                  | 0.9287 | 0.9528 | 0.8901   | 1.0659  | 0.7930  | 0.9684  | 0.7205  | 0.7411  |
| 6-oxopiperidine-2-carboxylate                 | Amino Acid           | Lysine Metabolism                                       | 1.1937 | 1.1078 | 0.8912   | 1.1616  | 0.7917  | 0.7872  | 0.7263  | 0.7586  |
| 6-phosphogluconate                            | Carbohydrate         | Pentose Phosphate Pathway                               | 0.3685 | 0.2884 | 0.2473   | 0.4232  | 9.4483  | 13.0584 | 2.9119  | 6.8153  |
| 7-dehydrocholesterol                          | Lipid                | Sterol                                                  | 0.4126 | 0.4948 | 0.3413</ |         |         |         |         |         |



|                                                  |                        |                                                              |        |        |        |        |         |         |         |        |
|--------------------------------------------------|------------------------|--------------------------------------------------------------|--------|--------|--------|--------|---------|---------|---------|--------|
| adrenolcarnitine (C22:4)*                        | Lipid                  | Fatty Acid Metabolism (Acyl Carnitine, Polyunsaturated)      | 0.9507 | 0.8754 | 1.1943 | 0.4119 | 1.1757  | 2.0121  | 0.3821  | 1.0000 |
| AICA ribonucleotide                              | Nucleotide             | Purine Metabolism, (Hypo)Xanthine/Inosine containing         | 2.3366 | 1.0000 | 4.6103 | 1.1399 | 0.3921  | 0.3921  | 0.4881  | 0.4263 |
| alanine                                          | Amino Acid             | Alanine and Aspartate Metabolism                             | 0.8469 | 0.9284 | 0.8347 | 1.2169 | 0.8364  | 0.8112  | 0.7690  | 0.9176 |
| alanylleucine                                    | Peptide                | Dipeptide                                                    | 0.3920 | 0.3920 | 0.3920 | 0.3920 | 0.8441  | 0.3920  | 0.3920  | 0.3920 |
| allantoin                                        | Nucleotide             | Purine Metabolism, (Hypo)Xanthine/Inosine containing         | 1.0598 | 1.0410 | 0.9995 | 1.0640 | 1.0005  | 1.0575  | 0.8617  | 0.9885 |
| alpha-hydroxyisocaproate                         | Amino Acid             | Leucine, Isoleucine and Valine Metabolism                    | 1.6681 | 1.0907 | 0.9625 | 1.4409 | 0.5817  | 0.5817  | 0.5817  | 0.5817 |
| alpha-hydroxyisovalerate                         | Amino Acid             | Leucine, Isoleucine and Valine Metabolism                    | 1.5017 | 1.2927 | 1.4923 | 1.3416 | 0.3244  | 0.3134  | 0.4332  | 0.2257 |
| alpha-ketoglutarate*                             | Amino Acid             | Glutamate Metabolism                                         | 1.0504 | 1.0515 | 1.0000 | 1.2324 | 0.1815  | 0.5137  | 0.3923  | 0.3962 |
| alpha-ketoglutarate                              | Energy                 | TCA Cycle                                                    | 2.5719 | 2.0000 | 2.5072 | 1.4196 | 0.7655  | 0.8153  | 0.7799  | 0.8418 |
| alpha-tocopherol                                 | Cofactors and Vitami   | Tocopherol Metabolism                                        | 1.0636 | 0.9177 | 0.8154 | 1.1123 | 1.3997  | 0.8480  | 0.7024  | 0.7787 |
| arabinose                                        | Carbohydrate           | Pentose Metabolism                                           | 0.5750 | 0.5564 | 0.8524 | 0.5075 | 2.1703  | 1.3473  | 1.5789  | 2.6238 |
| arabitol/xylitol                                 | Carbohydrate           | Pentose Metabolism                                           | 1.1013 | 0.9878 | 1.1396 | 0.9174 | 1.0439  | 0.7859  | 0.8348  | 1.2162 |
| arabonate/xylonate                               | Carbohydrate           | Pentose Metabolism                                           | 0.7851 | 0.6364 | 0.8180 | 0.7106 | 0.9876  | 1.0124  | 1.1176  | 1.6604 |
| arachidate (20:0)                                | Lipid                  | Long Chain Saturated Fatty Acid                              | 0.6558 | 0.4341 | 1.8704 | 0.6142 | 2.1882  | 3.3638  | 2.2066  | 1.4411 |
| arachidonate (20:4n6)                            | Lipid                  | Long Chain Polyunsaturated Fatty Acid (n3 and n6)            | 0.1938 | 0.1054 | 0.4534 | 0.2306 | 14.5155 | 17.4606 | 12.0011 | 5.9213 |
| arachidonoyl CoA                                 | Lipid                  | Fatty Acid Metabolism                                        | 0.8060 | 0.7925 | 0.7925 | 0.7925 | 1.9886  | 2.7919  | 0.7925  | 2.2911 |
| arachidonoyl ethanolamide                        | Lipid                  | Endocannabinoid                                              | 0.3911 | 0.3911 | 0.3911 | 0.3911 | 1.9163  | 1.5966  | 0.3911  | 1.0000 |
| arachidonoylcarnitine (C20:4)                    | Lipid                  | Fatty Acid Metabolism (Acyl Carnitine, Polyunsaturated)      | 0.7764 | 0.8752 | 1.2826 | 0.4698 | 1.1248  | 1.5355  | 0.4064  | 1.1789 |
| arachidonoylcholine                              | Lipid                  | Fatty Acid Metabolism (Acyl Choline)                         | 0.5923 | 0.5923 | 0.5923 | 0.5923 | 0.5923  | 0.5923  | 0.5923  | 0.5923 |
| arachidoylcarnitine (C20)*                       | Lipid                  | Fatty Acid Metabolism (Acyl Carnitine, Long Chain Saturated) | 0.6765 | 1.1564 | 1.9595 | 0.9504 | 1.1292  | 0.4624  | 0.9003  | 0.8412 |
| arginine                                         | Amino Acid             | Urea cycle; Arginine and Proline Metabolism                  | 0.6567 | 0.6786 | 0.6920 | 0.8933 | 1.4043  | 1.5794  | 1.2815  | 1.5012 |
| argininosuccinate                                | Amino Acid             | Urea cycle; Arginine and Proline Metabolism                  | 0.8159 | 1.2145 | 1.5482 | 1.4691 | 0.8453  | 0.6416  | 1.1966  | 0.6669 |
| asparagine                                       | Amino Acid             | Alanine and Aspartate Metabolism                             | 0.7833 | 0.6817 | 0.7193 | 1.0791 | 0.9474  | 0.9144  | 0.8584  | 1.1124 |
| aspartate                                        | Amino Acid             | Alanine and Aspartate Metabolism                             | 0.6450 | 0.6928 | 0.9050 | 0.8298 | 1.3448  | 1.0498  | 1.2918  | 1.7491 |
| behenoyl dihydrosphingomyelin (d18:0/22:0)*      | Lipid                  | Dihydrosphingomyelins                                        | 0.6995 | 0.7594 | 0.2292 | 1.1976 | 2.1804  | 2.2620  | 0.7778  | 0.8159 |
| behenoyl sphingomyelin (d18:1/22:0)*             | Lipid                  | Sphingomyelins                                               | 0.5328 | 0.8041 | 0.6093 | 0.8303 | 2.9857  | 1.5983  | 0.7435  | 1.0197 |
| benzoate                                         | Xenobiotics            | Benzoate Metabolism                                          | 0.9435 | 1.5843 | 0.9446 | 1.6135 | 2.0455  | 2.2632  | 0.7535  | 1.9370 |
| beta-alanine                                     | Nucleotide             | Pyrimidine Metabolism, Uracil containing                     | 2.6293 | 2.1107 | 2.1265 | 2.3184 | 0.5339  | 0.3716  | 0.2874  | 0.5127 |
| beta-citrylgutamate                              | Amino Acid             | Glutamate Metabolism                                         | 1.0794 | 1.0385 | 1.1480 | 1.0743 | 1.1656  | 1.2067  | 1.2230  | 1.2095 |
| beta-guanidinopropanoate                         | Xenobiotics            | Food Component/Plant                                         | 1.5110 | 1.6605 | 1.0595 | 1.6908 | 0.7576  | 0.8002  | 0.6160  | 1.2286 |
| beta-hydroxyisovalerate                          | Amino Acid             | Leucine, Isoleucine and Valine Metabolism                    | 1.5736 | 1.1543 | 1.1756 | 1.4189 | 0.5269  | 0.4135  | 0.4137  | 0.3609 |
| beta-hydroxyisovaleryl carnitine                 | Amino Acid             | Leucine, Isoleucine and Valine Metabolism                    | 0.9386 | 0.8673 | 0.9892 | 1.0108 | 2.3106  | 2.8837  | 2.4630  | 3.1410 |
| beta-sitosterol                                  | Lipid                  | Sterol                                                       | 0.6928 | 0.6928 | 0.6928 | 0.6928 | 0.6928  | 0.6928  | 0.6928  | 0.6928 |
| betaine                                          | Amino Acid             | Glycine, Serine and Threonine Metabolism                     | 1.4220 | 1.3015 | 1.4456 | 1.4426 | 0.8187  | 1.1712  | 0.7642  | 0.9724 |
| bilirubin                                        | Cofactors and Vitami   | Hemoglobin and Porphyrin Metabolism                          | 0.8832 | 1.5212 | 0.7917 | 1.1208 | 0.5651  | 0.5651  | 0.5651  | 0.5651 |
| biotin                                           | Cofactors and Vitami   | Biotin Metabolism                                            | 0.6127 | 0.6127 | 0.6127 | 1.5160 | 0.6127  | 0.6127  | 0.6127  | 0.6127 |
| branched-chain, straight-chain, or cyclopropyl 1 | Partially Characterize | Partially Characterized Molecules                            | 0.9067 | 0.7785 | 1.8675 | 1.0774 | 1.6359  | 1.5959  | 2.0492  | 0.9750 |
| butyrate/isobutyrate (4:0)                       | Lipid                  | Short Chain Fatty Acid                                       | 0.5948 | 0.2870 | 0.6296 | 0.2870 | 0.2870  | 1.4536  | 1.9934  | 1.3525 |
| butyrylcarnitine (C4)                            | Lipid                  | Fatty Acid Metabolism (also BCAA Metabolism)                 | 1.6449 | 1.4717 | 1.6172 | 1.4454 | 0.9203  | 1.2256  | 0.7021  | 0.9323 |
| C-glycosyltryptophan                             | Amino Acid             | Tryptophan Metabolism                                        | 0.9483 | 0.8031 | 1.0703 | 0.7941 | 3.5756  | 3.9538  | 4.2244  | 4.2231 |
| cadaverine                                       | Amino Acid             | Lysine Metabolism                                            | 1.1531 | 0.9698 | 0.8762 | 1.0302 | 0.8762  | 0.8762  | 0.8762  | 0.8762 |
| campesterol                                      | Lipid                  | Sterol                                                       | 0.9739 | 0.9640 | 0.7515 | 0.7515 | 0.7515  | 0.9286  | 0.7515  | 0.8096 |
| carboxyethyl-GABA                                | Amino Acid             | Glutamate Metabolism                                         | 0.2614 | 0.2562 | 0.3290 | 0.2531 | 2.9746  | 2.3214  | 2.6750  | 2.7066 |
| carnitine                                        | Lipid                  | Carnitine Metabolism                                         | 1.2013 | 1.1860 | 1.1199 | 1.5469 | 1.9931  | 1.6641  | 1.9403  | 3.1077 |
| carnosine                                        | Amino Acid             | Histidine Metabolism                                         | 0.5492 | 0.5280 | 0.6253 | 0.6417 | 0.7857  | 0.9621  | 0.8102  | 0.9383 |
| catechol sulfate                                 | Xenobiotics            | Benzoate Metabolism                                          | 0.3965 | 0.3965 | 0.3965 | 0.3965 | 1.0341  | 1.2833  | 1.6111  | 0.9136 |
| ceramide (d16:1/24:1, d18:1/22:1)*               | Lipid                  | Ceramides                                                    | 0.5708 | 0.6026 | 0.5402 | 1.2260 | 1.4075  | 0.1817  | 0.1817  | 0.1817 |
| ceramide (d18:1/14:0, d16:1/16:0)*               | Lipid                  | Ceramides                                                    | 0.8648 | 0.9057 | 0.6540 | 1.1379 | 1.3302  | 0.6627  | 0.4184  | 0.6191 |
| ceramide (d18:1/17:0, d17:1/18:0)*               | Lipid                  | Ceramides                                                    | 0.5460 | 0.7052 | 0.4146 | 1.3942 | 3.5779  | 1.1482  | 0.6524  | 1.0409 |
| ceramide (d18:2/24:1, d18:1/24:2)*               | Lipid                  | Ceramides                                                    | 0.8745 | 1.0032 | 0.9286 | 1.2146 | 2.8138  | 0.9968  | 0.8580  | 1.0976 |
| cholesterol                                      | Lipid                  | Sterol                                                       | 0.9993 | 1.1070 | 0.9897 | 1.1694 | 1.4126  | 1.3194  | 0.9564  | 1.2667 |
| choline                                          | Lipid                  | Phospholipid Metabolism                                      | 0.8490 | 0.7669 | 0.8533 | 0.9846 | 1.6648  | 1.8298  | 1.8227  | 1.6898 |
| phosphocholine                                   | Lipid                  | Phospholipid Metabolism                                      | 0.7380 | 0.8200 | 0.6596 | 1.2796 | 0.9078  | 0.8226  | 0.8037  | 1.0922 |
| cis-4-decenoylcarnitine (C10:1)                  | Lipid                  | Fatty Acid Metabolism (Acyl Carnitine, Monounsaturated)      | 1.0056 | 1.0442 | 1.1227 | 0.7518 | 0.7518  | 2.3450  | 0.7518  | 0.7518 |
| citrate                                          | Energy                 | TCA Cycle                                                    | 0.9618 | 0.8021 | 0.6907 | 0.8348 | 1.7209  | 2.4041  | 1.9783  | 1.4436 |
| citrulline                                       | Amino Acid             | Urea cycle; Arginine and Proline Metabolism                  | 1.0650 | 0.9739 | 0.9104 | 1.3465 | 0.8124  | 0.9041  | 0.7746  | 0.8497 |
| CoA-glutathione*                                 | Amino Acid             | Glutathione Metabolism                                       | 0.7841 | 0.6736 | 1.1483 | 0.9732 | 1.7526  | 2.2259  | 2.6914  | 2.3773 |
| CoA                                              | Cofactors and Vitami   | Pantothenate and CoA Metabolism                              | 0.6567 | 0.6676 | 1.0475 | 1.0380 | 0.7712  | 1.0460  | 1.2582  | 1.0715 |
| creatine                                         | Amino Acid             | Creatine Metabolism                                          | 1.1786 | 1.0060 | 0.9940 | 1.2292 | 1.3760  | 1.4202  | 1.1745  | 1.4125 |
| creatine phosphate                               | Amino Acid             | Creatine Metabolism                                          | 1.8274 | 1.3952 | 1.2322 | 1.6225 | 1.2126  | 1.3465  | 0.8264  | 0.9902 |
| creatinine                                       | Amino Acid             | Creatine Metabolism                                          | 1.2343 | 1.0413 | 0.9553 | 1.3568 | 1.4321  | 1.7747  | 1.2996  | 1.4004 |
| cyclic dGSH                                      | Amino Acid             | Glutathione Metabolism                                       | 0.9551 | 1.1131 | 0.8965 | 1.0248 | 0.8171  | 1.0254  | 0.7533  | 0.7493 |
| cystathionine                                    | Amino Acid             | Methionine, Cysteine, SAM and Taurine Metabolism             | 4.7811 | 5.3016 | 4.5865 | 4.8581 | 0.7346  | 0.7346  | 0.7346  | 0.7346 |
| cysteine                                         | Amino Acid             | Methionine, Cysteine, SAM and Taurine Metabolism             | 0.6196 | 0.6379 | 0.6997 | 1.2446 | 0.6399  | 0.9330  | 0.8194  | 0.9886 |
| cysteine-glutathione disulfide                   | Amino Acid             | Glutathione Metabolism                                       | 0.5821 | 0.5425 | 0.6288 | 1.0959 | 0.5256  | 1.0930  | 1.0641  | 1.5210 |
| cysteinylglycine                                 | Amino Acid             | Glutathione Metabolism                                       | 0.7559 | 0.7429 | 0.6614 | 0.9619 | 0.5029  | 0.5640  | 0.4425  | 0.4998 |
| cytidine                                         | Nucleotide             | Pyrimidine Metabolism, Cytidine containing                   | 0.5638 | 0.6470 | 1.0396 | 0.9932 | 1.6596  | 1.7069  | 2.0738  | 1.8775 |
| CDP-choline                                      | Lipid                  | Phospholipid Metabolism                                      | 0.6240 | 0.5627 | 0.6694 | 0.6713 | 1.2431  | 1.3886  | 1.2331  | 1.1881 |
| CMP                                              | Nucleotide             | Pyrimidine Metabolism, Cytidine containing                   | 1.0346 | 0.9437 | 0.9305 | 1.2215 | 0.5411  | 0.5772  | 0.7320  | 0.6510 |
| cytidine 5'-monophospho-N-acetylneuraminic ac    | Carbohydrate           | Nucleotide Sugar                                             | 1.1766 | 0.9672 | 0.9365 | 1.2483 | 0.6753  | 0.7076  | 0.8659  | 0.8055 |
| cytidine diphosphate                             | Nucleotide             | Pyrimidine Metabolism, Cytidine containing                   | 1.0954 | 0.8282 | 0.4969 | 0.8720 | 3.8044  | 4.9027  | 2.9103  | 2.1542 |
| cytidine triphosphate                            | Nucleotide             | Pyrimidine Metabolism, Cytidine containing                   | 0.6370 | 0.3475 | 0.3475 | 0.3475 | 10.9132 | 16.1421 | 3.8368  | 3.0386 |
| CDP-ethanolamine                                 | Lipid                  | Phospholipid Metabolism                                      | 0.5606 | 0.4938 | 0.5884 | 0.5655 | 1.6888  | 1.5303  | 1.4633  | 1.9049 |
| cytosine                                         | Nucleotide             | Pyrimidine Metabolism, Cytidine containing                   | 0.5300 | 0.5300 | 0.5300 | 0.5300 | 3.1420  | 2.9452  | 3.4078  | 2.3266 |
| decanoylcarnitine (C10)                          | Lipid                  | Fatty Acid Metabolism (Acyl Carnitine, Medium Chain)         | 0.5507 | 0.8878 | 1.4676 | 0.5469 | 0.5469  | 0.5469  | 0.5469  | 0.5469 |
| deoxycarnitine                                   | Lipid                  | Carnitine Metabolism                                         | 1.0315 | 0.8955 | 1.1557 | 1.0555 | 0.9685  | 0.7768  | 0.7465  | 1.2985 |
| diacetylspermidine*                              | Amino Acid             | Polyamine Metabolism                                         | 0.6008 | 0.6008 | 0.6008 | 0.6008 | 0.6008  | 0.6008  | 0.6008  | 0.6008 |
| diadenosine triphosphate                         | Nucleotide             | Purine Metabolism, Adenine containing                        | 0.8503 | 0.9933 | 1.1703 | 1.0136 | 0.8727  | 1.1562  | 1.4187  | 0.9020 |
| dihomolinoleate (20:2n6)                         | Lipid                  | Long Chain Polyunsaturated Fatty Acid (n3 and n6)            | 0.2666 | 0.2102 | 0.9879 | 0.3887 | 9.1103  | 9.2427  | 6.9411  | 4.3935 |
| dihomolinolenate (20:3n3 or 3n6)                 | Lipid                  | Long Chain Polyunsaturated Fatty Acid (n3 and n6)            | 0.3865 | 0.2508 | 0.8919 | 0.4758 | 11.4895 | 15.1506 | 12.8175 | 6.6893 |
| dihomo-linolenoylcarnitine (C20:3n3 or 6)*       | Lipid                  | Fatty Acid Metabolism (Acyl Carnitine, Polyunsaturated)      | 0.9525 | 0.9572 | 1.3091 | 0.4282 | 1.6344  | 1.8286  | 0.5850  | 1.0428 |
| dihomo-linoleoylcarnitine (C20:2)*               | Lipid                  | Fatty Acid Metabolism (Acyl Carnitine, Polyunsaturated)      | 0.9595 | 0.8587 | 1.3794 | 0.4055 | 1.0405  | 1.2957  | 0.3497  | 0.6021 |
| dihydroorotate                                   | Nucleotide             | Pyrimidine Metabolism, Orotate containing                    | 1.8725 | 1.3712 | 4.3672 | 0.3261 | 0.3261  | 0.3261  | 0.3261  | 0.3261 |
| dihydroxyacetone phosphate (DHAP)                | Carbohydrate           | Glycolysis, Gluconeogenesis, and Pyruvate Metabolism         | 0.8986 | 0.9039 | 1.3583 | 1.0961 | 8.2379  | 1.1449  | 0.2131  | 0.4042 |
| dimethylarginine (ADMA + SDMA)                   | Amino Acid             | Urea cycle; Arginine and Proline Metabolism                  | 0.5920 | 0.6031 | 0.7342 | 0.8839 | 0.7930  | 1.1043  | 1.2573  | 1.2940 |
| dimethylglycine                                  | Amino Acid             | Glycine, Serine and Threonine Metabolism                     | 1.6866 | 1.3216 | 1.3819 | 1.5179 | 1.0523  | 1.3192  | 1.0781  | 0.8451 |
| dimethylmalonic acid                             | Lipid                  | Fatty Acid, Dicarboxylate                                    | 0.7559 | 0.5904 | 1.0855 | 0.4950 | 1.2288  | 0.4950  | 0.4950  | 1.4634 |
| docosadienoate (22:2n6)                          | Lipid                  | Long Chain Polyunsaturated Fatty Acid (n3 and n6)            | 0.6274 | 0.3598 | 2.5019 | 0.4522 | 3.7740  | 3.4451  | 2.4130  | 1.6469 |
| docosahexaenoate (DHA; 22:6n3)                   | Lipid                  | Long Chain Polyunsaturated Fatty Acid (n3 and n6)            | 0.2961 | 0.1546 | 0.9751 | 0.2336 | 6.9813  | 6.9474  | 5.1776  | 2.4936 |
| docosahexaenoylcarnitine (C22:6)*                | Lipid                  | Fatty Acid Metabolism (Acyl Carnitine, Polyunsaturated)      | 1.2599 | 1.0000 | 1.9871 | 0.2331 | 0.3956  | 0.7219  | 0.2331  | 0.2331 |
| docosahexaenoylcholine                           | Lipid                  | Fatty Acid Metabolism (Acyl Choline)                         | 0.2145 | 0.2145 | 0.2145 | 0.2145 | 1.7747  | 1.7489  | 1.1572  | 1.5833 |
| docosapentaenoate (DPA; 22:5n3)                  | Lipid                  | Long Chain Polyunsaturated Fatty Acid (n3 and n6)            | 0.2135 | 0.1124 | 0.6077 | 0.2107 | 12.6463 | 14.3855 | 9.0659  | 4.5061 |
| docosapentaenoate (n6 DPA; 22:5n6)               | Lipid                  | Long Chain Polyunsaturated Fatty Acid (n3 and n6)            | 0.3590 | 0.2245 | 1.0157 | 0.3641 | 8.4214  | 13.2613 | 8.2361  | 4.6183 |
| docosapentaenoylcarnitine (C22:5n3)*             | Lipid                  | Fatty Acid Metabolism (Acyl Carnitine, Polyunsaturated)      | 1.0546 | 0.9454 | 1.2607 | 0.2782 | 1.2602  | 1.8434  | 0.2935  | 0.8658 |
| docosatrienoate (22:3n3)                         | Lipid                  | Long Chain Polyunsaturated Fatty Acid (n3 and n6)            | 0.5593 | 0.3390 | 1.3515 | 0.4781 | 5.2117  | 8.7367  | 4.1625  | 2.8601 |
| docosatrienoate (22:3n6)*                        | Lipid                  | Long Chain Polyunsaturated Fatty Acid (n3 and n6)            | 0.3854 | 0.1773 | 1.0696 | 0.3405 | 4.7963  | 8.7344  | 5.1643  | 3.1752 |
| dodecadienoate (12:2)*                           | Lipid                  | Fatty Acid, Dicarboxylate                                    | 1.7489 | 0.8203 | 0.5247 | 1.0579 | 2.1819  | 2.9080  |         |        |



|                                                 |                      |                                                      |        |        |        |        |         |          |        |        |
|-------------------------------------------------|----------------------|------------------------------------------------------|--------|--------|--------|--------|---------|----------|--------|--------|
| Isobar: hexose diphosphates                     | Carbohydrate         | Glycolysis, Gluconeogenesis, and Pyruvate Metabolism | 0.6342 | 0.5019 | 0.2829 | 0.6701 | 13.3241 | 5.9693   | 2.3101 | 2.1884 |
| fructosyllysine                                 | Amino Acid           | Lysine Metabolism                                    | 0.4483 | 1.1740 | 0.5604 | 1.0056 | 0.6568  | 2.1755   | 0.9882 | 0.6832 |
| fumarate                                        | Energy               | TCA Cycle                                            | 1.1819 | 0.9933 | 1.2942 | 1.2599 | 1.0831  | 1.0067   | 1.2698 | 0.9359 |
| galactitol (dulcitol)                           | Carbohydrate         | Fructose, Mannose and Galactose Metabolism           | 0.8821 | 0.6002 | 0.7272 | 0.7560 | 2.6132  | 1.8290   | 1.8946 | 2.7282 |
| galactonate                                     | Carbohydrate         | Fructose, Mannose and Galactose Metabolism           | 2.8203 | 2.3886 | 2.7118 | 2.1945 | 0.5980  | 0.5980   | 0.5980 | 0.5980 |
| galactosylglycerol                              | Lipid                | Galactosyl Glycerolipids                             | 1.4011 | 1.5277 | 1.7155 | 1.4181 | 0.1827  | 0.1787   | 0.1413 | 0.2399 |
| gamma-glutamylcysteine                          | Peptide              | Gamma-glutamyl Amino Acid                            | 0.4633 | 0.8900 | 0.9630 | 1.0871 | 0.5697  | 0.6825   | 0.7729 | 0.6840 |
| gamma-glutamylglutamate                         | Peptide              | Gamma-glutamyl Amino Acid                            | 1.0018 | 0.9445 | 0.9961 | 1.0230 | 0.9443  | 1.5578   | 1.7140 | 1.3086 |
| gamma-glutamylglutamine                         | Peptide              | Gamma-glutamyl Amino Acid                            | 0.1918 | 0.2304 | 0.2663 | 0.2690 | 1.2728  | 1.3599   | 1.2022 | 1.8927 |
| gamma-glutamylhistidine                         | Peptide              | Gamma-glutamyl Amino Acid                            | 0.2562 | 0.2562 | 0.4659 | 0.4366 | 0.8346  | 0.2562   | 0.6124 | 0.6895 |
| gamma-glutamylisoleucine*                       | Peptide              | Gamma-glutamyl Amino Acid                            | 0.4683 | 0.4566 | 0.4338 | 0.5972 | 1.4390  | 1.4429   | 1.3679 | 1.6664 |
| gamma-glutamylleucine                           | Peptide              | Gamma-glutamyl Amino Acid                            | 0.2688 | 0.2735 | 0.2650 | 0.3596 | 1.4014  | 1.2951   | 1.1236 | 1.6848 |
| gamma-glutamylmethionine                        | Peptide              | Gamma-glutamyl Amino Acid                            | 0.3598 | 0.4406 | 0.6340 | 0.5269 | 1.0090  | 1.5317   | 1.2882 | 1.1630 |
| gamma-glutamylphenylalanine                     | Peptide              | Gamma-glutamyl Amino Acid                            | 0.6575 | 0.7511 | 0.7839 | 0.9921 | 0.5986  | 0.6185   | 0.6031 | 0.8123 |
| gamma-glutamylthreonine                         | Peptide              | Gamma-glutamyl Amino Acid                            | 0.1463 | 0.1602 | 0.1104 | 0.2706 | 1.4091  | 1.9397   | 1.7073 | 2.1611 |
| gamma-glutamyltryptophan                        | Peptide              | Gamma-glutamyl Amino Acid                            | 0.7478 | 0.7478 | 0.7478 | 0.7478 | 0.7478  | 0.7478   | 0.7478 | 0.7478 |
| gamma-glutamyltyrosine                          | Peptide              | Gamma-glutamyl Amino Acid                            | 0.5350 | 0.6871 | 0.5356 | 1.0122 | 0.5350  | 0.5350   | 0.5350 | 0.5350 |
| gamma-glutamylvaline                            | Peptide              | Gamma-glutamyl Amino Acid                            | 0.2961 | 0.2812 | 0.2458 | 0.4186 | 1.4683  | 1.5277   | 1.4223 | 1.7532 |
| glucuronate                                     | Xenobiotics          | Food Component/Plant                                 | 1.0002 | 0.3030 | 0.1874 | 0.4578 | 3.3481  | 3.5906   | 0.9998 | 3.7395 |
| glucosamine-6-phosphate                         | Carbohydrate         | Aminosugar Metabolism                                | 0.0262 | 0.0262 | 0.0262 | 0.0262 | 2.8402  | 6.4625   | 1.0230 | 2.0632 |
| glucose                                         | Carbohydrate         | Glycolysis, Gluconeogenesis, and Pyruvate Metabolism | 0.6583 | 0.5417 | 0.4553 | 0.6127 | 3.0045  | 110.1271 | 1.1427 | 2.0171 |
| glucose 6-phosphate                             | Carbohydrate         | Glycolysis, Gluconeogenesis, and Pyruvate Metabolism | 0.3339 | 0.2191 | 0.2346 | 0.3887 | 9.3269  | 17.7428  | 3.3685 | 5.8033 |
| glucuronate                                     | Carbohydrate         | Aminosugar Metabolism                                | 1.1583 | 0.8732 | 0.6244 | 1.2401 | 1.3809  | 1.0847   | 0.8962 | 1.2153 |
| glutamate                                       | Amino Acid           | Glutamate Metabolism                                 | 1.0076 | 0.8545 | 0.9451 | 1.0780 | 1.0375  | 0.9186   | 0.9723 | 1.0921 |
| glutamate, gamma-methyl ester                   | Amino Acid           | Glutamate Metabolism                                 | 0.8565 | 0.8584 | 1.7128 | 1.0313 | 0.4140  | 0.3963   | 0.2858 | 0.4099 |
| glutamine                                       | Amino Acid           | Glutamate Metabolism                                 | 0.9368 | 0.9830 | 0.8932 | 1.2631 | 0.6816  | 0.5972   | 0.3944 | 0.8447 |
| glutarate (C5-DC)                               | Lipid                | Fatty Acid, Dicarboxylate                            | 0.9595 | 0.8809 | 0.9727 | 1.0908 | 0.8879  | 0.7410   | 1.5994 | 0.5142 |
| glutarylcarntine (C5-DC)                        | Amino Acid           | Lysine Metabolism                                    | 0.3885 | 0.3885 | 0.3885 | 0.3885 | 3.8434  | 3.1149   | 4.0244 | 3.9807 |
| glutathione, oxidized (GSSG)                    | Amino Acid           | Glutathione Metabolism                               | 1.0222 | 0.8329 | 0.7994 | 1.1004 | 0.9083  | 1.0272   | 0.9437 | 1.1228 |
| glutathione, reduced (GSH)                      | Amino Acid           | Glutathione Metabolism                               | 0.8859 | 0.8139 | 0.6897 | 1.1994 | 1.2259  | 1.0532   | 0.9888 | 1.1018 |
| glycerate                                       | Carbohydrate         | Glycolysis, Gluconeogenesis, and Pyruvate Metabolism | 0.5087 | 0.4316 | 0.4194 | 0.6213 | 3.2300  | 3.3042   | 1.1191 | 2.3021 |
| glycerol                                        | Lipid                | Glycerolipid Metabolism                              | 0.9923 | 1.0297 | 1.2128 | 1.2779 | 0.7255  | 1.0787   | 0.9987 | 0.8685 |
| glycerol 3-phosphate                            | Lipid                | Glycerolipid Metabolism                              | 0.4152 | 0.4426 | 0.6621 | 0.9968 | 3.1299  | 3.0961   | 3.7672 | 2.8415 |
| glycerophosphoethanolamine                      | Lipid                | Phospholipid Metabolism                              | 0.3305 | 0.2728 | 0.2294 | 0.4359 | 1.1303  | 1.0337   | 0.9669 | 1.3123 |
| glycerophosphoglycerol                          | Lipid                | Glycerolipid Metabolism                              | 1.0082 | 0.8906 | 1.2229 | 0.8924 | 0.9918  | 0.8577   | 0.9242 | 1.0762 |
| glycerophosphoinositol*                         | Lipid                | Phospholipid Metabolism                              | 1.2727 | 1.0654 | 0.9106 | 1.1903 | 1.7937  | 1.9776   | 1.8072 | 2.2629 |
| glycerophosphorylcholine (GPC)                  | Lipid                | Phospholipid Metabolism                              | 0.2419 | 0.1803 | 0.1135 | 0.3865 | 1.7123  | 1.5781   | 1.2008 | 1.6115 |
| glycerophosphoserine*                           | Lipid                | Phospholipid Metabolism                              | 1.2694 | 1.1566 | 1.4837 | 1.4150 | 0.5808  | 0.5542   | 0.4799 | 0.6149 |
| glycine                                         | Amino Acid           | Glycine, Serine and Threonine Metabolism             | 1.2503 | 1.1774 | 1.2697 | 1.3649 | 0.7471  | 0.6660   | 0.6636 | 0.8233 |
| glycochenodeoxycholate                          | Lipid                | Primary Bile Acid Metabolism                         | 0.5766 | 0.5766 | 0.5766 | 0.5766 | 0.5766  | 0.5766   | 0.5766 | 0.5766 |
| glycodeoxycholate                               | Lipid                | Secondary Bile Acid Metabolism                       | 0.4640 | 0.4640 | 0.4640 | 0.4640 | 0.4640  | 0.4640   | 0.4640 | 0.4640 |
| glycosyl ceramide (d16:1/24:1, d18:1/22:1)*     | Lipid                | Hexosylceramides (HCER)                              | 0.6447 | 0.2886 | 0.6002 | 0.9519 | 2.0908  | 0.7027   | 0.5653 | 1.0513 |
| glycosyl ceramide (d18:1/20:0, d16:1/22:0)*     | Lipid                | Hexosylceramides (HCER)                              | 0.5373 | 0.5468 | 0.4364 | 0.7698 | 8.3191  | 3.1408   | 2.5211 | 3.4873 |
| glycosyl ceramide (d18:1/23:1, d17:1/24:1)*     | Lipid                | Hexosylceramides (HCER)                              | 0.5645 | 0.8123 | 0.6709 | 0.8779 | 2.7998  | 1.0549   | 0.6053 | 1.0060 |
| glycosyl ceramide (d18:2/24:1, d18:1/24:2)*     | Lipid                | Hexosylceramides (HCER)                              | 0.8864 | 1.0030 | 0.8678 | 0.9766 | 3.0797  | 1.4004   | 1.0226 | 1.2796 |
| glycosyl-N-behenoyl-sphingadienine (d18:2/22:0) | Lipid                | Hexosylceramides (HCER)                              | 0.7305 | 0.8291 | 0.6797 | 0.9795 | 2.7621  | 1.2357   | 0.8226 | 0.9457 |
| glycosyl-N-palmitoyl-sphingosine (d18:1/16:0)   | Lipid                | Hexosylceramides (HCER)                              | 0.8843 | 0.9947 | 0.7512 | 1.0053 | 1.6606  | 0.8839   | 0.5134 | 0.7542 |
| glycosyl-N-stearoyl-sphinganine (d18:0/18:0)*   | Lipid                | Hexosylceramides (HCER)                              | 0.3664 | 0.3664 | 0.3664 | 0.3664 | 4.8888  | 0.9091   | 0.3664 | 1.0909 |
| glycosyl-N-stearoyl-sphingosine (d18:1/18:0)    | Lipid                | Hexosylceramides (HCER)                              | 0.7808 | 0.9013 | 0.7465 | 0.9384 | 5.5552  | 2.4946   | 1.3175 | 1.8051 |
| glycylisoleucine                                | Peptide              | Dipeptide                                            | 0.1525 | 0.2404 | 0.1525 | 0.4099 | 0.1525  | 0.1525   | 0.1525 | 0.1525 |
| glycylleucine                                   | Peptide              | Dipeptide                                            | 0.4526 | 0.4639 | 0.3318 | 0.9040 | 1.0960  | 0.7532   | 0.5507 | 0.6921 |
| glycylvaline                                    | Peptide              | Dipeptide                                            | 0.5171 | 0.4794 | 0.3542 | 1.0217 | 0.9783  | 0.8329   | 0.5485 | 0.4821 |
| guaiacol sulfate                                | Xenobiotics          | Benzoate Metabolism                                  | 0.8198 | 0.5534 | 0.6712 | 0.8600 | 1.2231  | 1.2959   | 1.1191 |        |
| guanine                                         | Nucleotide           | Purine Metabolism, Guanine containing                | 0.3957 | 0.4405 | 1.4189 | 1.1779 | 1.0826  | 0.9193   | 1.0651 | 1.0212 |
| guanosine                                       | Nucleotide           | Purine Metabolism, Guanine containing                | 0.7297 | 1.0627 | 1.5605 | 1.7194 | 2.2443  | 2.5735   | 3.2936 | 2.6432 |
| guanosine 5'- diphosphate (GDP)                 | Nucleotide           | Purine Metabolism, Guanine containing                | 1.4664 | 0.6761 | 0.5343 | 0.2839 | 8.2668  | 9.2780   | 5.2134 | 4.3454 |
| 5'- GMP                                         | Nucleotide           | Purine Metabolism, Guanine containing                | 1.3593 | 1.1108 | 0.9948 | 1.4766 | 0.7787  | 0.8221   | 1.0052 | 1.0111 |
| guanosine 5'-diphospho-fucose                   | Carbohydrate         | Nucleotide Sugar                                     | 0.9954 | 0.9049 | 0.9496 | 0.9884 | 1.5785  | 1.6221   | 1.3056 | 1.2133 |
| gulonate*                                       | Cofactors and Vitami | Ascorbate and Aldarate Metabolism                    | 1.8720 | 1.5997 | 1.0978 | 1.6116 | 0.1027  | 0.0907   | 0.0987 | 0.1165 |
| heneicosapentaenoate (d15:3n3)                  | Lipid                | Long Chain Polyunsaturated Fatty Acid (n3 and n6)    | 0.0795 | 0.0795 | 0.0795 | 0.0795 | 2.7006  | 2.1623   | 1.4091 | 0.7125 |
| heptadecaphingosine (d17:1)                     | Lipid                | Sphingosines                                         | 0.3548 | 0.3796 | 0.1382 | 1.0881 | 1.3744  | 1.1952   | 0.6730 | 1.4732 |
| heptanoate (7:0)                                | Lipid                | Medium Chain Fatty Acid                              | 0.9989 | 0.9218 | 1.1181 | 1.1879 | 1.9183  | 2.4854   | 1.7296 | 1.4880 |
| hexadecadienoate (16:2n6)                       | Lipid                | Long Chain Polyunsaturated Fatty Acid (n3 and n6)    | 0.6345 | 0.4051 | 1.8598 | 0.4582 | 6.0685  | 6.2973   | 6.7206 | 2.9327 |
| hexadecaphingosine (d16:1)*                     | Lipid                | Sphingosines                                         | 0.2743 | 0.3262 | 0.1801 | 0.7290 | 1.6590  | 0.7825   | 0.4049 | 1.0375 |
| hexanoylcarntine (C6)                           | Lipid                | Fatty Acid Metabolism (Acyl Carnitine, Medium Chain) | 1.0420 | 1.0080 | 1.5536 | 0.9776 | 1.4993  | 1.7916   | 1.3521 | 0.9920 |
| hippurate                                       | Xenobiotics          | Benzoate Metabolism                                  | 0.4971 | 0.5015 | 0.4443 | 0.6527 | 1.9604  | 2.6246   | 1.9222 | 1.7097 |
| histidine                                       | Amino Acid           | Histidine Metabolism                                 | 0.6148 | 0.6666 | 0.7671 | 1.0076 | 1.0518  | 0.9810   | 0.9924 | 1.0762 |
| histidine methyl ester                          | Amino Acid           | Histidine Metabolism                                 | 0.8837 | 0.7884 | 0.9623 | 1.1017 | 0.9118  | 0.9046   | 0.8274 | 0.7639 |
| homocysteine                                    | Amino Acid           | Methionine, Cysteine, SAM and Taurine Metabolism     | 1.1385 | 0.8885 | 1.3781 | 1.1813 | 0.4785  | 1.1547   | 0.8248 | 0.4785 |
| homostachydrine*                                | Xenobiotics          | Food Component/Plant                                 | 1.7116 | 1.5367 | 2.0415 | 1.7858 | 0.7152  | 0.8508   | 0.8094 | 0.8957 |
| hydroxy-N6,N6,N6-trimethyllysine*               | Amino Acid           | Lysine Metabolism                                    | 0.6512 | 0.6677 | 0.8180 | 0.9651 | 0.7814  | 0.6417   | 0.5816 | 0.8655 |
| hydroxyasparagine                               | Amino Acid           | Alanine and Aspartate Metabolism                     | 1.3742 | 1.3653 | 0.8316 | 1.8682 | 0.5260  | 0.5260   | 0.5260 | 0.5260 |
| hypotaaurine                                    | Amino Acid           | Methionine, Cysteine, SAM and Taurine Metabolism     | 1.4114 | 1.2288 | 1.2765 | 1.4184 | 1.4416  | 0.9520   | 0.8526 | 1.7202 |
| hypoxanthine                                    | Nucleotide           | Purine Metabolism, (Hypo)Xanthine/Inosine containing | 0.7449 | 1.0058 | 1.6252 | 1.4126 | 0.9598  | 0.9942   | 1.2999 | 1.3681 |
| imidazole lactate                               | Amino Acid           | Histidine Metabolism                                 | 4.6856 | 3.7750 | 4.5187 | 4.3610 | 0.3004  | 0.2155   | 0.2520 | 0.3020 |
| imidazole propionate                            | Amino Acid           | Histidine Metabolism                                 | 4.1145 | 3.4424 | 3.6169 | 3.9631 | 0.1837  | 0.1784   | 0.1486 | 0.1881 |
| indoleacetate                                   | Amino Acid           | Tryptophan Metabolism                                | 0.5611 | 0.5611 | 0.5611 | 0.5611 | 0.5611  | 1.5740   | 1.2465 | 0.9348 |
| indolelactate                                   | Amino Acid           | Tryptophan Metabolism                                | 1.0750 | 0.9250 | 0.6046 | 1.1676 | 0.3710  | 0.6628   | 0.8844 | 0.3671 |
| inosine                                         | Nucleotide           | Purine Metabolism, (Hypo)Xanthine/Inosine containing | 0.6505 | 1.0084 | 1.3687 | 1.4384 | 1.8231  | 1.4567   | 1.6522 | 2.0676 |
| inosine 5'-monophosphate (IMP)                  | Nucleotide           | Purine Metabolism, (Hypo)Xanthine/Inosine containing | 0.4832 | 0.9559 | 3.2081 | 1.7354 | 2.6011  | 3.1578   | 3.8451 | 2.8593 |
| inositol 1-phosphate (IP)                       | Lipid                | Inositol Metabolism                                  | 0.6519 | 0.6602 | 0.4343 | 0.9546 | 4.1621  | 6.0902   | 3.9243 | 3.6577 |
| isobutylrncarnitine (C4)                        | Amino Acid           | Leucine, Isoleucine and Valine Metabolism            | 0.9916 | 0.9294 | 1.6249 | 1.0209 | 2.3110  | 2.3167   | 2.2386 | 2.2375 |
| isocitrate                                      | Energy               | TCA Cycle                                            | 0.8072 | 0.5032 | 0.3312 | 0.3312 | 5.6547  | 10.1969  | 7.0692 | 3.5363 |
| isoleucine                                      | Amino Acid           | Leucine, Isoleucine and Valine Metabolism            | 0.8989 | 0.8610 | 0.8148 | 1.1569 | 1.2006  | 1.2396   | 1.0577 | 1.2073 |
| isoleucylglycine                                | Peptide              | Dipeptide                                            | 0.2448 | 0.2018 | 0.1356 | 0.5157 | 1.1678  | 0.7632   | 0.5266 | 0.8182 |
| isovalerylcarnitine (C5)                        | Amino Acid           | Leucine, Isoleucine and Valine Metabolism            | 0.9327 | 0.7966 | 1.7591 | 1.0673 | 2.2909  | 1.6196   | 1.4728 | 1.7180 |
| isovalerylglycine                               | Amino Acid           | Leucine, Isoleucine and Valine Metabolism            | 1.3292 | 0.9982 | 1.2599 | 0.8451 | 0.4205  | 2.4264   | 2.0212 | 0.4205 |
| kynurenate                                      | Amino Acid           | Tryptophan Metabolism                                | 0.3630 | 0.3630 | 0.3630 | 0.3630 | 1.6637  | 2.3969   | 1.7407 | 1.2846 |
| kynurenine                                      | Amino Acid           | Tryptophan Metabolism                                | 0.7925 | 0.8139 | 0.8081 | 1.2001 | 0.7442  | 0.8329   | 0.6120 | 0.7336 |
| lactate                                         | Carbohydrate         | Glycolysis, Gluconeogenesis, and Pyruvate Metabolism | 1.0106 | 0.9115 | 0.8169 | 1.1662 | 1.1493  | 1.2034   | 0.8126 | 0.9894 |
| lactose                                         | Carbohydrate         | Disaccharides and Oligosaccharides                   | 0.3380 | 0.2938 | 0.5845 | 0.5740 | 4.9498  | 6.1893   | 4.3076 | 2.3385 |
| lactosyl-N-behenoyl-sphingosine (d18:1/22:0)*   | Lipid                | Lactosylceramides (LCER)                             | 0.6078 | 0.6853 | 0.6226 | 0.7798 | 4.0951  | 3.0090   | 1.5503 | 1.8697 |
| lactosyl-N-nervonoyl-sphingosine (d18:1/24:1)*  | Lipid                | Lactosylceramides (LCER)                             | 0.5816 | 0.6931 | 0.5911 | 0.7467 | 3.2487  | 2.2853   | 1.4679 | 1.6986 |
| lactosyl-N-palmitoyl-sphingosine (d18:1/16:0)   | Lipid                | Lactosylceramides (LCER)                             | 0.5905 | 0.7169 | 0.4670 | 0.8347 | 1.5719  | 1.4057   | 0.9514 | 1.1131 |
| lactosyl-N-stearoyl-sphingosine (d18:1/18:0)*   | Lipid                | Lactosylceramides (LCER)                             | 0.5272 | 0.6173 | 0.3859 | 0.8120 | 3.3228  | 3.1476   | 1.9353 | 2.1143 |
| laurylcarnitine (C12)                           | Lipid                | Fatty Acid Metabolism (Acyl Carnitine, Medium Chain) | 1.3407 | 1.7458 | 2.5258 | 0.9266 | 0.5247  | 0.7282   | 0.8173 | 0.5788 |
| leucine                                         | Amino Acid           | Leucine, Isoleucine and Valine Metabolism            | 0.8297 | 0.7940 | 0.7985 | 1.0801 | 1.1687  | 1.1581   | 1.0089 | 1.     |

|                                                |                      |                                                              |        |        |        |        |        |         |        |        |
|------------------------------------------------|----------------------|--------------------------------------------------------------|--------|--------|--------|--------|--------|---------|--------|--------|
| margarate (17:0)                               | Lipid                | Long Chain Saturated Fatty Acid                              | 0.6280 | 0.4084 | 1.8029 | 0.5917 | 6.3680 | 6.7985  | 4.5729 | 3.3118 |
| margaroylcarnitine (C17)*                      | Lipid                | Fatty Acid Metabolism (Acyl Carnitine, Long Chain Saturated) | 0.9048 | 0.8671 | 1.6134 | 0.6243 | 1.0819 | 1.1565  | 0.6002 | 0.9181 |
| mead acid (20:3n9)                             | Lipid                | Long Chain Polyunsaturated Fatty Acid (n3 and n6)            | 0.2514 | 0.1791 | 0.8928 | 0.3317 | 9.6137 | 11.7398 | 7.4596 | 4.4479 |
| methionine                                     | Amino Acid           | Methionine, Cysteine, SAM and Taurine Metabolism             | 0.7735 | 0.7835 | 0.7799 | 1.0757 | 1.0869 | 1.1374  | 0.9716 | 1.1130 |
| methionine sulfone                             | Amino Acid           | Methionine, Cysteine, SAM and Taurine Metabolism             | 0.9145 | 0.9261 | 0.8430 | 1.4490 | 0.4451 | 0.5012  | 0.2638 | 0.4866 |
| methionine sulfoxide                           | Amino Acid           | Methionine, Cysteine, SAM and Taurine Metabolism             | 0.6793 | 0.5521 | 0.5115 | 0.8967 | 1.0796 | 1.0917  | 0.9077 | 1.4329 |
| methyl glucopyranoside (alpha + beta)          | Xenobiotics          | Food Component/Plant                                         | 0.2635 | 0.2379 | 0.1755 | 0.3554 | 1.9308 | 1.5629  | 1.2485 | 1.8236 |
| methylmalonate (MMA)                           | Lipid                | Fatty Acid Metabolism (also BCAA Metabolism)                 | 0.7380 | 0.6812 | 0.2604 | 0.7930 | 1.8408 | 1.0762  | 1.2313 | 1.2831 |
| methylphosphate                                | Nucleotide           | Purine and Pyrimidine Metabolism                             | 0.4231 | 0.3887 | 0.9661 | 0.7580 | 1.4047 | 0.9875  | 0.6760 | 1.0816 |
| methylsuccinate                                | Amino Acid           | Leucine, Isoleucine and Valine Metabolism                    | 1.5892 | 1.3572 | 1.6132 | 1.1782 | 0.9568 | 1.4538  | 0.8039 | 1.1875 |
| myo-inositol                                   | Lipid                | Inositol Metabolism                                          | 1.1564 | 1.1591 | 1.6276 | 1.1857 | 1.4012 | 1.4999  | 1.2332 | 1.4383 |
| myristate (14:0)                               | Lipid                | Long Chain Saturated Fatty Acid                              | 0.9309 | 0.6650 | 2.6525 | 0.8272 | 2.6305 | 2.9053  | 2.0490 | 1.1591 |
| myristoleate (14:1n5)                          | Lipid                | Long Chain Monounsaturated Fatty Acid                        | 0.9654 | 0.7719 | 2.3686 | 0.8425 | 1.4220 | 1.5311  | 1.7838 | 0.8800 |
| myristoleoylcarnitine (C14:1)*                 | Lipid                | Fatty Acid Metabolism (Acyl Carnitine, Monounsaturated)      | 0.7913 | 1.0464 | 1.6309 | 0.5084 | 0.9566 | 1.2123  | 0.5083 | 1.0434 |
| myristoyl dihydroshpingomyelin (d18:0/14:0)*   | Lipid                | Dihydroshpingomyelins                                        | 0.6929 | 0.8894 | 0.6229 | 1.0883 | 1.8681 | 1.3818  | 0.7759 | 0.8822 |
| myristoylcarnitine (C14)                       | Lipid                | Fatty Acid Metabolism (Acyl Carnitine, Long Chain Saturated) | 1.9384 | 2.1734 | 2.7209 | 1.2516 | 0.5117 | 0.6120  | 0.3856 | 0.5801 |
| N(1)-acetylspermidine                          | Amino Acid           | Polyamine Metabolism                                         | 0.2864 | 0.2263 | 0.3001 | 0.3136 | 0.0372 | 0.0446  | 0.0217 | 0.0326 |
| N(1)-acetylsermine                             | Amino Acid           | Polyamine Metabolism                                         | 0.3810 | 0.2640 | 0.3768 | 0.2720 | 0.2640 | 0.2640  | 0.2640 | 0.2640 |
| N,N,N-trimethyl-5-aminovalerate                | Amino Acid           | Lysine Metabolism                                            | 1.1062 | 1.0546 | 1.3825 | 1.0227 | 1.0746 | 1.0793  | 0.9658 | 1.4028 |
| N,N,N-trimethyl-alanylproline betaine (TMAP)   | Amino Acid           | Urea cycle; Arginine and Proline Metabolism                  | 0.4504 | 0.4564 | 0.7052 | 0.4605 | 2.5560 | 2.4628  | 2.4291 | 2.9161 |
| N-acetyl-1-methylhistidine*                    | Amino Acid           | Histidine Metabolism                                         | 0.3804 | 0.4103 | 0.8404 | 0.3804 | 0.3804 | 0.3804  | 0.3804 | 0.3804 |
| N-acetyl-3-methylhistidine*                    | Amino Acid           | Histidine Metabolism                                         | 0.3770 | 0.4762 | 0.6590 | 0.5691 | 4.6908 | 4.2239  | 3.7842 | 4.9038 |
| N-acetyl-aspartyl-glutamate (NAAG)             | Amino Acid           | Glutamate Metabolism                                         | 1.2222 | 1.3422 | 1.5139 | 1.1961 | 0.9093 | 1.1540  | 1.1033 | 0.9039 |
| N-acetyl-cadaverine                            | Amino Acid           | Lysine Metabolism                                            | 2.2973 | 2.3110 | 2.6346 | 3.2442 | 0.1680 | 1.6421  | 0.2960 | 0.3890 |
| N-acetyl-glucosamine 1-phosphate               | Carbohydrate         | Aminosugar Metabolism                                        | 2.6411 | 2.3529 | 1.4775 | 2.0615 | 0.8720 | 1.0181  | 1.1365 | 0.9963 |
| N-acetyl-isoputresnine                         | Amino Acid           | Polyamine Metabolism                                         | 0.4137 | 0.4151 | 0.3676 | 0.4985 | 1.6150 | 1.7368  | 1.6517 | 1.9974 |
| N-acetylalanine                                | Amino Acid           | Alanine and Aspartate Metabolism                             | 1.2760 | 1.1003 | 1.1280 | 1.3731 | 0.3990 | 0.3937  | 0.3804 | 0.5326 |
| N-acetylarginine                               | Amino Acid           | Urea cycle; Arginine and Proline Metabolism                  | 0.7124 | 0.7671 | 0.7782 | 0.9415 | 1.0075 | 0.9925  | 1.0270 | 1.1654 |
| N-acetylaspargine                              | Amino Acid           | Alanine and Aspartate Metabolism                             | 1.2967 | 1.0680 | 0.7658 | 1.4161 | 0.9455 | 0.8639  | 0.9902 | 0.9647 |
| N-acetylaspargate (NAA)                        | Amino Acid           | Alanine and Aspartate Metabolism                             | 1.2542 | 1.1636 | 1.1307 | 1.4168 | 0.7807 | 0.7019  | 0.7025 | 0.9111 |
| N-acetylcyteine                                | Amino Acid           | Methionine, Cysteine, SAM and Taurine Metabolism             | 0.9939 | 0.9189 | 0.9010 | 1.6019 | 1.7554 | 1.5391  | 2.7137 | 1.4476 |
| N-acetylglucosamine 6-phosphate                | Carbohydrate         | Aminosugar Metabolism                                        | 0.2012 | 0.1945 | 0.2325 | 0.4612 | 2.0026 | 2.0951  | 1.9665 | 2.0380 |
| N-acetylglucosamine/N-acetylgalactosamine      | Carbohydrate         | Aminosugar Metabolism                                        | 0.6032 | 0.4566 | 0.6007 | 1.2307 | 3.5131 | 3.9708  | 3.8736 | 3.8481 |
| N-acetylglucosaminylasparagine                 | Carbohydrate         | Aminosugar Metabolism                                        | 0.9181 | 0.8648 | 0.9259 | 1.0403 | 0.7523 | 0.8170  | 0.7941 | 0.9615 |
| N-acetylglutamate                              | Amino Acid           | Glutamate Metabolism                                         | 1.9358 | 1.8987 | 1.8269 | 2.1672 | 0.4705 | 0.4574  | 0.5118 | 0.4138 |
| N-acetylglutamine                              | Amino Acid           | Glutamate Metabolism                                         | 1.3706 | 1.1717 | 0.9880 | 1.5171 | 0.4756 | 0.4347  | 0.3919 | 0.5020 |
| N-acetylhistidine                              | Amino Acid           | Histidine Metabolism                                         | 0.4062 | 0.4594 | 0.5897 | 0.6260 | 4.5183 | 3.9126  | 3.7958 | 4.7014 |
| N-acetylisoleucine                             | Amino Acid           | Leucine, Isoleucine and Valine Metabolism                    | 1.0816 | 0.6632 | 0.3784 | 1.1493 | 0.3784 | 0.3784  | 0.3784 | 0.3784 |
| N-acetyllecucine                               | Amino Acid           | Leucine, Isoleucine and Valine Metabolism                    | 0.7539 | 0.7030 | 0.6568 | 1.1336 | 0.3300 | 0.3300  | 0.3300 | 0.5822 |
| N-acetylmethionine                             | Amino Acid           | Methionine, Cysteine, SAM and Taurine Metabolism             | 0.6058 | 0.5557 | 0.5144 | 0.8513 | 0.8315 | 1.0962  | 1.1701 | 1.2518 |
| N-acetylmethionine sulfoxide                   | Amino Acid           | Methionine, Cysteine, SAM and Taurine Metabolism             | 0.3243 | 0.2101 | 0.1413 | 0.3948 | 1.0286 | 1.4805  | 1.3785 | 1.8399 |
| N-acetylneuraminate                            | Carbohydrate         | Aminosugar Metabolism                                        | 4.7371 | 4.7037 | 4.9231 | 4.4231 | 0.5168 | 0.4127  | 0.3760 | 0.4810 |
| N-acetylphenylalanine                          | Amino Acid           | Phenylalanine Metabolism                                     | 0.8158 | 0.7958 | 0.8085 | 1.0854 | 0.3688 | 0.3624  | 0.4641 | 0.5487 |
| N-acetylputrescine                             | Amino Acid           | Polyamine Metabolism                                         | 1.5788 | 1.7244 | 1.4919 | 2.7270 | 0.8077 | 1.2096  | 0.1439 | 0.1950 |
| N-acetyls erine                                | Amino Acid           | Glycine, Serine and Threonine Metabolism                     | 2.5600 | 2.1195 | 1.6572 | 2.3747 | 0.4799 | 0.5060  | 0.5041 | 0.5625 |
| N-acetyltaurine                                | Amino Acid           | Methionine, Cysteine, SAM and Taurine Metabolism             | 2.4349 | 1.9254 | 1.8943 | 2.2888 | 0.7482 | 0.7503  | 0.6099 | 0.7886 |
| N-acetylthreonine                              | Amino Acid           | Glycine, Serine and Threonine Metabolism                     | 1.2770 | 1.1756 | 1.3288 | 1.3310 | 0.4479 | 0.3365  | 0.4049 | 0.6823 |
| N-acetyltryptophan                             | Amino Acid           | Tryptophan Metabolism                                        | 0.6238 | 0.6238 | 0.6238 | 0.6238 | 0.6238 | 0.6238  | 0.6238 | 0.6238 |
| N-acetyltyrosine                               | Amino Acid           | Tyrosine Metabolism                                          | 0.5434 | 0.5408 | 0.6561 | 0.7288 | 1.0482 | 0.8577  | 0.8750 | 0.9990 |
| N-acetylvaline                                 | Amino Acid           | Leucine, Isoleucine and Valine Metabolism                    | 0.9737 | 0.8967 | 0.9785 | 1.0424 | 0.5146 | 0.5393  | 0.6452 | 0.6474 |
| N-arachidonoyltaurine                          | Lipid                | Endocannabinoid                                              | 0.3134 | 0.1553 | 0.7919 | 0.2556 | 3.3560 | 3.1543  | 1.5655 | 0.9647 |
| N-delta-acetylorithine                         | Amino Acid           | Urea cycle; Arginine and Proline Metabolism                  | 0.8120 | 0.9102 | 0.9383 | 1.2770 | 0.5100 | 0.5337  | 0.4831 | 0.6054 |
| N-formylmethionine                             | Amino Acid           | Methionine, Cysteine, SAM and Taurine Metabolism             | 0.8720 | 0.8748 | 0.9233 | 1.1316 | 1.1003 | 0.8151  | 0.9702 | 1.1313 |
| N-glycylneuraminate                            | Carbohydrate         | Aminosugar Metabolism                                        | 1.5617 | 1.3841 | 1.6824 | 1.6422 | 0.1515 | 0.1067  | 0.1067 | 0.1690 |
| N-linoleoyltaurine*                            | Lipid                | Endocannabinoid                                              | 0.2220 | 0.1033 | 0.8109 | 0.2177 | 3.8670 | 3.6959  | 2.0793 | 1.1606 |
| N-methylproline                                | Amino Acid           | Urea cycle; Arginine and Proline Metabolism                  | 1.2635 | 0.9835 | 1.4601 | 1.3965 | 1.0165 | 1.0410  | 0.5737 | 1.0903 |
| N-monomethylarginine                           | Amino Acid           | Urea cycle; Arginine and Proline Metabolism                  | 0.3633 | 0.7914 | 0.5726 | 0.9829 | 1.6663 | 2.1914  | 2.1513 | 2.3760 |
| N-myristoyltaurine*                            | Lipid                | Endocannabinoid                                              | 0.2728 | 0.2728 | 0.2728 | 0.2728 | 1.0185 | 0.9715  | 0.5956 | 0.5945 |
| N-oleoylserine                                 | Lipid                | Endocannabinoid                                              | 0.5346 | 0.3634 | 2.1974 | 0.4993 | 1.3569 | 0.3522  | 0.6076 | 0.3522 |
| N-oleoyltaurine                                | Lipid                | Endocannabinoid                                              | 0.2020 | 0.1296 | 0.5471 | 0.2452 | 4.1754 | 4.5605  | 2.6093 | 1.6750 |
| N-palmitoyl-sphingadinenine (d18:2/16:0)*      | Lipid                | Ceramides                                                    | 0.7036 | 0.7492 | 0.5199 | 1.0160 | 1.3590 | 0.7254  | 0.4948 | 0.6130 |
| N-palmitoyl-sphinganine (d18:0/16:0)           | Lipid                | Dihydroceramides                                             | 0.5815 | 0.7141 | 0.5456 | 2.2220 | 1.6884 | 0.5379  | 0.1616 | 0.5298 |
| N-palmitoyl-sphingosine (d18:1/16:0)           | Lipid                | Ceramides                                                    | 0.7035 | 0.7732 | 0.4807 | 1.4249 | 1.9169 | 0.9047  | 0.5408 | 0.7366 |
| N-palmitoylglycine                             | Lipid                | Fatty Acid Metabolism (Acyl Glycine)                         | 1.6994 | 0.8597 | 5.6772 | 1.1403 | 0.2839 | 0.2839  | 0.2839 | 0.8146 |
| N-palmitoyltaurine                             | Lipid                | Endocannabinoid                                              | 0.2261 | 0.1591 | 0.6533 | 0.2786 | 4.1978 | 4.6729  | 2.5028 | 1.5745 |
| N-stearoyl-sphinganine (d18:0/18:0)*           | Lipid                | Dihydroceramides                                             | 0.1983 | 0.1983 | 0.1983 | 1.2919 | 1.5138 | 0.1983  | 0.1983 | 0.1983 |
| N-stearoyl-sphingosine (d18:1/18:0)*           | Lipid                | Ceramides                                                    | 0.5088 | 0.6080 | 0.4434 | 1.0375 | 3.1634 | 1.4393  | 0.9787 | 1.4018 |
| N-stearoyltaurine                              | Lipid                | Endocannabinoid                                              | 0.3055 | 0.1929 | 0.8354 | 0.3290 | 4.2433 | 5.3517  | 3.0801 | 2.0894 |
| N1,N12-diacetylserpine                         | Amino Acid           | Polyamine Metabolism                                         | 0.3761 | 0.3761 | 0.3761 | 0.3761 | 0.3761 | 0.3761  | 0.3761 | 0.3761 |
| 1-methyladenosine                              | Nucleotide           | Purine Metabolism, Adenine containing                        | 0.3491 | 0.3386 | 0.4407 | 0.4743 | 1.6306 | 1.7381  | 1.5584 | 1.6744 |
| N1-methylinosine                               | Nucleotide           | Purine Metabolism, (Hypo)Xanthine/Inosine containing         | 0.3115 | 0.1184 | 0.4688 | 0.3887 | 4.1439 | 4.1882  | 4.6323 | 4.3911 |
| N2,N2-dimethylguanosine                        | Nucleotide           | Purine Metabolism, Guanine containing                        | 1.0975 | 0.7369 | 0.7055 | 0.8189 | 1.5409 | 1.6762  | 1.7231 | 1.5388 |
| N2-acetyllysine                                | Amino Acid           | Lysine Metabolism                                            | 0.1674 | 0.1861 | 0.1764 | 0.2680 | 1.5525 | 1.0000  | 1.0613 | 1.7423 |
| N2-methylguanosine                             | Nucleotide           | Purine Metabolism, Guanine containing                        | 0.9214 | 0.6216 | 0.5952 | 0.7426 | 1.6515 | 1.8014  | 1.5107 | 1.9885 |
| N6,N6,N6-trimethyllysine                       | Amino Acid           | Lysine Metabolism                                            | 0.6594 | 0.6719 | 0.7677 | 0.8871 | 0.6846 | 0.7538  | 0.6823 | 0.7467 |
| N6,N6-dimethyllysine                           | Amino Acid           | Lysine Metabolism                                            | 0.9026 | 0.9530 | 1.0470 | 1.1733 | 0.7368 | 0.7368  | 1.6581 | 0.7368 |
| N6-acetyllysine                                | Amino Acid           | Lysine Metabolism                                            | 1.0006 | 1.1232 | 1.1342 | 1.4655 | 0.9994 | 1.0883  | 1.2334 | 1.1311 |
| N6-carbamoylthreonyladenosine                  | Nucleotide           | Purine Metabolism, Adenine containing                        | 0.7296 | 0.7768 | 0.8113 | 0.8678 | 1.2738 | 1.1707  | 0.9928 | 1.4656 |
| N6-carboxymethyllysine                         | Carbohydrate         | Advanced Glycation End-product                               | 0.8112 | 0.7906 | 0.8237 | 0.8651 | 0.9964 | 0.9048  | 0.3047 | 1.0436 |
| N6-methyladenosine                             | Nucleotide           | Purine Metabolism, Adenine containing                        | 0.9005 | 1.0508 | 1.1107 | 1.9090 | 1.7799 | 0.5476  | 2.4208 | 1.6471 |
| N6-methyllysine                                | Amino Acid           | Lysine Metabolism                                            | 0.6933 | 0.7365 | 0.7688 | 1.0748 | 1.1175 | 1.4228  | 1.4796 | 1.3269 |
| N6-succinyladenosine                           | Nucleotide           | Purine Metabolism, Adenine containing                        | 0.7264 | 0.9418 | 0.8074 | 1.1970 | 0.8266 | 0.6029  | 0.9151 | 1.0555 |
| nicotinamide                                   | Cofactors and Vitami | Nicotinate and Nicotinamide Metabolism                       | 1.0333 | 0.9296 | 0.6244 | 1.2994 | 1.9631 | 2.0308  | 1.8645 | 1.9046 |
| NAD+                                           | Cofactors and Vitami | Nicotinate and Nicotinamide Metabolism                       | 1.0033 | 0.9865 | 1.3472 | 1.1934 | 0.9378 | 0.9967  | 0.8367 | 1.0138 |
| nicotinamide adenine dinucleotide phosphate re | Cofactors and Vitami | Nicotinate and Nicotinamide Metabolism                       | 0.1654 | 0.7095 | 0.6740 | 0.1654 | 1.7364 | 3.0974  | 3.0885 | 1.2905 |
| NADH                                           | Cofactors and Vitami | Nicotinate and Nicotinamide Metabolism                       | 1.1329 | 1.3362 | 2.0339 | 1.3322 | 0.9369 | 0.4931  | 0.6580 | 0.3520 |
| nicotinamide ribonucleotide (NMN)              | Cofactors and Vitami | Nicotinate and Nicotinamide Metabolism                       | 1.0147 | 0.7986 | 1.8459 | 1.4796 | 1.6910 | 1.7336  | 2.8217 | 2.0142 |
| nicotinamide riboside                          | Cofactors and Vitami | Nicotinate and Nicotinamide Metabolism                       | 0.5885 | 0.4671 | 0.6741 | 0.5642 | 1.2127 | 1.4174  | 1.1859 | 1.5041 |
| nisinate (24:6n3)                              | Lipid                | Long Chain Polyunsaturated Fatty Acid (n3 and n6)            | 0.6139 | 0.3099 | 1.4378 | 0.3839 | 1.9957 | 3.1610  | 1.6886 | 1.1253 |
| nonadecanoate (19:0)                           | Lipid                | Long Chain Saturated Fatty Acid                              | 0.5628 | 0.3906 | 1.7376 | 0.5774 | 5.4473 | 5.2032  | 3.2933 | 2.3416 |
| O-methyltyrosine                               | Amino Acid           | Tyrosine Metabolism                                          | 1.4057 | 1.2611 | 1.4555 | 1.3240 | 1.0298 | 1.2461  | 1.1082 | 0.8680 |
| O-sulfo-L-tyrosine                             | Xenobiotics          | Chemical                                                     | 0.8935 | 0.9385 | 0.9595 | 1.2948 | 0.6371 | 0.7688  | 0.6455 | 0.5921 |
| o-Tyrosine                                     | Amino Acid           | Tyrosine Metabolism                                          | 0.5107 | 0.3411 | 0.5671 | 0.3411 | 0.3411 | 1.3450  | 0.3411 | 0.7341 |
| octanoylcarnitine (C8)                         | Lipid                | Fatty Acid Metabolism (Acyl Carnitine, Medium Chain)         | 0.9761 | 1.0999 | 1.4636 | 0.8240 | 2.1709 | 1.9273  | 1.0239 | 0.8727 |
| oleate/vaccenate (18:1)                        | Lipid                | Long Chain Monounsaturated Fatty Acid                        | 0.5327 | 0.3525 | 1.4287 | 0.6660 | 4.9291 | 6.1135  | 4.8917 | 3.1259 |
| oleoyl CoA                                     | Lipid                | Fatty Acid Metabolism                                        | 1.4408 | 0.9707 | 0.5957 | 1.1734 | 2.5942 | 2.4911  | 1.3338 | 1.3232 |
| oleoyl ethanolamide                            | Lipid                | Endocannabinoid                                              | 0.3915 | 0.4648 | 0.4896 | 0.5062 | 2.4056 | 1.4245  | 1.1949 | 1.5444 |
| oleoyl-archidonoyl-glycerol (18:1/20:4) [2]*   | Lipid                | Diacylglycerol                                               | 0.5240 | 0.5240 | 0.524  |        |        |         |        |        |

|                                                |                      |                                                              |        |        |        |        |         |        |        |         |
|------------------------------------------------|----------------------|--------------------------------------------------------------|--------|--------|--------|--------|---------|--------|--------|---------|
| palmitoyl sphingomyelin (d18:1/16:0)           | Lipid                | Sphingomyelins                                               | 0.7864 | 0.8008 | 0.6644 | 0.9397 | 2.5321  | 1.8589 | 1.3936 | 1.4321  |
| palmitoyl-oleoyl-glycerol (16:0/18:1) [2]*     | Lipid                | Diacylglycerol                                               | 1.6924 | 2.1840 | 2.5504 | 2.2459 | 0.4453  | 0.4453 | 0.4453 | 0.4453  |
| palmitoylcarnitine (C16)                       | Lipid                | Fatty Acid Metabolism (Acyl Carnitine, Long Chain Saturated) | 1.4041 | 1.4030 | 2.2909 | 1.0515 | 0.7604  | 0.7447 | 0.3496 | 0.5948  |
| palmitoylcholine                               | Lipid                | Fatty Acid Metabolism (Acyl Choline)                         | 0.2182 | 0.1988 | 0.6352 | 0.3212 | 0.8681  | 1.0169 | 1.7528 | 0.4799  |
| panthetheine                                   | Cofactors and Vitami | Pantothenate and CoA Metabolism                              | 0.5172 | 0.5223 | 0.5428 | 0.8814 | 2.0849  | 2.0882 | 1.6272 | 2.3063  |
| pantoate                                       | Cofactors and Vitami | Pantothenate and CoA Metabolism                              | 1.1477 | 0.8666 | 1.1168 | 1.0322 | 1.6670  | 1.9342 | 1.5709 | 1.0861  |
| pantothenate (Vitamin B5)                      | Cofactors and Vitami | Pantothenate and CoA Metabolism                              | 0.9483 | 0.8787 | 0.7688 | 1.0883 | 1.1222  | 1.3755 | 1.2299 | 1.3545  |
| penicillin G                                   | Xenobiotics          | Drug - Antibiotic                                            | 0.6619 | 0.6206 | 0.7150 | 0.6817 | 2.2728  | 3.2214 | 2.2462 | 1.4369  |
| pentadecanoate (15:0)                          | Lipid                | Long Chain Saturated Fatty Acid                              | 0.8878 | 0.5445 | 2.0464 | 0.7031 | 4.0143  | 5.0573 | 3.5442 | 2.1635  |
| pentadecanoylcarnitine (C15)*                  | Lipid                | Fatty Acid Metabolism (Acyl Carnitine, Long Chain Saturated) | 0.9885 | 1.1030 | 1.7802 | 0.8715 | 1.1575  | 0.8006 | 0.3856 | 0.9212  |
| phenethylamine                                 | Amino Acid           | Phenylalanine Metabolism                                     | 0.4305 | 0.4672 | 0.5690 | 0.7396 | 3.2015  | 5.2264 | 2.1374 | 4.2352  |
| phenol red                                     | Xenobiotics          | Chemical                                                     | 0.7099 | 0.6805 | 0.6866 | 0.8379 | 2.0362  | 2.6480 | 1.7866 | 1.3788  |
| phenol sulfate                                 | Amino Acid           | Tyrosine Metabolism                                          | 0.6753 | 0.6415 | 0.9968 | 0.6714 | 0.8948  | 1.0032 | 1.5740 | 0.9333  |
| phenylacetylglycine                            | Peptide              | Acetylated Peptides                                          | 1.1217 | 1.1187 | 1.2547 | 1.1643 | 0.9040  | 1.1675 | 0.9847 | 0.7909  |
| phenylalanine                                  | Amino Acid           | Phenylalanine Metabolism                                     | 0.8417 | 0.8329 | 0.8184 | 1.1400 | 1.1328  | 1.1444 | 0.9793 | 1.1259  |
| phenylalanylalanine                            | Peptide              | Dipeptide                                                    | 0.2627 | 0.2260 | 0.2260 | 0.5592 | 1.5278  | 1.0000 | 0.4384 | 0.8096  |
| phenylalanylglycine                            | Peptide              | Dipeptide                                                    | 0.3396 | 0.2559 | 0.1732 | 0.5503 | 1.1781  | 1.0448 | 0.6950 | 1.0510  |
| phenyllactate (PLA)                            | Amino Acid           | Phenylalanine Metabolism                                     | 1.4684 | 1.0187 | 1.0584 | 1.3845 | 0.5373  | 0.3601 | 0.6558 | 0.4063  |
| phenylpyruvate                                 | Amino Acid           | Phenylalanine Metabolism                                     | 0.6183 | 0.6183 | 0.6183 | 0.6953 | 0.6183  | 0.6183 | 1.6317 | 0.6183  |
| phosphate                                      | Energy               | Oxidative Phosphorylation                                    | 1.0661 | 0.9497 | 0.9450 | 1.1851 | 1.3828  | 1.5104 | 1.3601 | 1.5034  |
| phosphoenolpyruvate (PEP)                      | Carbohydrate         | Glycolysis, Gluconeogenesis, and Pyruvate Metabolism         | 0.3444 | 0.1506 | 0.4757 | 0.6433 | 11.2684 | 9.9280 | 2.6291 | 2.6845  |
| phosphoethanolamine (PE)                       | Lipid                | Phospholipid Metabolism                                      | 0.1014 | 0.0782 | 0.1485 | 0.1081 | 4.3631  | 3.6921 | 4.1164 | 4.1334  |
| phosphopantetheine                             | Cofactors and Vitami | Pantothenate and CoA Metabolism                              | 0.3549 | 0.3685 | 1.0325 | 0.8241 | 0.7198  | 0.7242 | 0.8605 | 0.8216  |
| phytosphingosine                               | Lipid                | Sphingolipid Synthesis                                       | 0.7952 | 0.9950 | 0.5853 | 1.3513 | 0.8567  | 0.6881 | 0.5316 | 0.6749  |
| pipecolate                                     | Amino Acid           | Lysine Metabolism                                            | 0.9844 | 1.0100 | 1.0190 | 1.1965 | 0.6508  | 0.6236 | 0.8615 | 0.4574  |
| prolylhydroxyproline                           | Amino Acid           | Urea cycle; Arginine and Proline Metabolism                  | 1.0797 | 1.0598 | 1.5206 | 1.2928 | 0.3211  | 0.8103 | 0.3722 | 0.3211  |
| proline                                        | Amino Acid           | Urea cycle; Arginine and Proline Metabolism                  | 1.5290 | 1.4047 | 1.6106 | 1.6308 | 0.8561  | 0.6711 | 0.5591 | 1.1180  |
| prolylglycine                                  | Peptide              | Dipeptide                                                    | 0.6173 | 0.7808 | 0.7879 | 1.1923 | 0.5478  | 0.6551 | 0.5849 | 0.6777  |
| propionylcarnitine (C3)                        | Lipid                | Fatty Acid Metabolism (also BCAA Metabolism)                 | 1.3620 | 1.1787 | 1.2403 | 1.0976 | 0.9935  | 1.2600 | 1.0065 | 1.3242  |
| pseudouridine                                  | Nucleotide           | Pyrimidine Metabolism, Uracil containing                     | 0.9139 | 0.8849 | 0.9567 | 1.0388 | 1.8328  | 1.7015 | 1.8114 | 2.1116  |
| pterin                                         | Cofactors and Vitami | Pterin Metabolism                                            | 1.5619 | 1.0000 | 0.4043 | 1.0256 | 1.3744  | 3.0336 | 1.7835 | 1.8444  |
| putrescine                                     | Amino Acid           | Polyamine Metabolism                                         | 4.4138 | 3.6720 | 2.6059 | 4.3463 | 0.3864  | 0.2311 | 0.2311 | 0.2311  |
| pyridoxal                                      | Cofactors and Vitami | Vitamin B6 Metabolism                                        | 1.0101 | 0.8340 | 0.9899 | 0.8510 | 1.2696  | 1.5179 | 1.6791 | 1.1363  |
| pyridoxal phosphate                            | Cofactors and Vitami | Vitamin B6 Metabolism                                        | 1.1971 | 0.9953 | 1.0767 | 1.1072 | 1.0047  | 1.2215 | 1.2844 | 0.9079  |
| pyridoxamine                                   | Cofactors and Vitami | Vitamin B6 Metabolism                                        | 1.3379 | 0.9941 | 0.9725 | 1.1446 | 1.9997  | 1.8804 | 2.0767 | 2.0456  |
| pyridoxamine phosphate                         | Cofactors and Vitami | Vitamin B6 Metabolism                                        | 1.0038 | 0.9552 | 1.0365 | 1.1766 | 2.3982  | 1.7135 | 1.7917 | 2.1537  |
| pyridoxate                                     | Cofactors and Vitami | Vitamin B6 Metabolism                                        | 0.3170 | 0.2992 | 0.2876 | 0.3888 | 1.7736  | 2.0144 | 1.7126 | 1.3896  |
| pyridoxine (Vitamin B6)                        | Cofactors and Vitami | Vitamin B6 Metabolism                                        | 0.8952 | 0.9364 | 0.9612 | 1.0712 | 1.1303  | 1.4829 | 1.2100 | 1.2083  |
| pyroglutamine*                                 | Amino Acid           | Glutamate Metabolism                                         | 2.8114 | 2.3913 | 2.4864 | 2.6695 | 0.8690  | 0.6995 | 0.6161 | 0.9712  |
| pyruvate                                       | Carbohydrate         | Glycolysis, Gluconeogenesis, and Pyruvate Metabolism         | 1.9381 | 1.7409 | 1.6286 | 1.6929 | 0.2617  | 0.2676 | 0.3180 | 0.3561  |
| quinolinate                                    | Cofactors and Vitami | Nicotinate and Nicotinamide Metabolism                       | 0.4914 | 0.4914 | 0.4914 | 1.0000 | 0.4914  | 0.4914 | 0.4914 | 0.4914  |
| retinol (Vitamin A)                            | Cofactors and Vitami | Vitamin A Metabolism                                         | 0.5463 | 0.6087 | 0.4971 | 0.8632 | 5.5673  | 5.4225 | 3.8634 | 4.5288  |
| ribose                                         | Carbohydrate         | Pentose Metabolism                                           | 2.1849 | 1.7066 | 1.8811 | 1.6217 | 0.2873  | 0.2547 | 0.2363 | 0.3460  |
| riboflavin (Vitamin B2)                        | Cofactors and Vitami | Riboflavin Metabolism                                        | 0.7739 | 0.7090 | 0.7558 | 0.9175 | 0.8382  | 0.9365 | 0.8680 | 0.9415  |
| ribonate                                       | Carbohydrate         | Pentose Metabolism                                           | 2.0121 | 1.5414 | 1.5775 | 1.4557 | 0.3857  | 0.3227 | 0.3299 | 0.4549  |
| ribose                                         | Carbohydrate         | Pentose Metabolism                                           | 0.5015 | 0.5335 | 0.5481 | 0.8238 | 1.8335  | 1.4459 | 0.9465 | 1.7592  |
| ribulonate/xylulonate/lyxonate*                | Carbohydrate         | Pentose Metabolism                                           | 0.8223 | 0.7872 | 0.8064 | 0.7562 | 1.3521  | 3.0350 | 1.2869 | 1.1783  |
| ribulose/xylulose                              | Carbohydrate         | Pentose Metabolism                                           | 1.3809 | 1.1231 | 1.0170 | 1.1669 | 0.9830  | 0.5022 | 0.5633 | 0.7666  |
| S-(1,2-dicarboxethyl)glutathione               | Amino Acid           | Glutathione Metabolism                                       | 1.1226 | 1.0049 | 1.1527 | 1.3600 | 0.3887  | 0.3956 | 0.5162 | 0.4391  |
| S-1-pyrroline-5-carboxylate                    | Amino Acid           | Glutamate Metabolism                                         | 0.4358 | 1.6502 | 0.8892 | 1.5091 | 0.7282  | 0.4041 | 0.3334 | 0.9236  |
| S-adenosylhomocysteine (SAH)                   | Amino Acid           | Methionine, Cysteine, SAM and Taurine Metabolism             | 1.3803 | 1.3704 | 1.5394 | 1.6302 | 0.9293  | 0.9758 | 1.0910 | 0.9384  |
| S-adenosylmethionine (SAM)                     | Amino Acid           | Methionine, Cysteine, SAM and Taurine Metabolism             | 0.8604 | 0.8440 | 0.7454 | 1.0204 | 0.6280  | 0.7824 | 0.7065 | 0.7181  |
| S-carboxethylcysteine                          | Amino Acid           | Methionine, Cysteine, SAM and Taurine Metabolism             | 0.6493 | 0.6567 | 0.6900 | 0.7847 | 1.0439  | 0.9096 | 1.3111 | 1.2657  |
| S-methylcysteine sulfoxide                     | Amino Acid           | Methionine, Cysteine, SAM and Taurine Metabolism             | 0.6303 | 1.3896 | 1.1325 | 0.9672 | 0.6303  | 0.6303 | 0.6303 | 0.6303  |
| S-methylglutathione                            | Amino Acid           | Glutathione Metabolism                                       | 0.8782 | 0.9495 | 0.7461 | 1.3144 | 0.3605  | 0.3677 | 0.3539 | 0.4135  |
| S-methylmethionine                             | Amino Acid           | Methionine, Cysteine, SAM and Taurine Metabolism             | 0.6006 | 0.8666 | 0.7852 | 1.0365 | 0.8621  | 1.2830 | 0.9635 | 0.9302  |
| saccharopine                                   | Amino Acid           | Lysine Metabolism                                            | 0.2260 | 0.2225 | 0.2352 | 0.6781 | 1.1723  | 0.9330 | 1.6541 | 1.0078  |
| sarcosine                                      | Amino Acid           | Glycine, Serine and Threonine Metabolism                     | 7.5664 | 5.7365 | 6.5388 | 5.9527 | 0.3858  | 0.3858 | 0.3858 | 0.3858  |
| sedoheptulose-7-phosphate                      | Carbohydrate         | Pentose Phosphate Pathway                                    | 0.5104 | 0.4450 | 0.3284 | 0.5407 | 0.9258  | 2.5644 | 3.5440 | 3.4936  |
| serine                                         | Amino Acid           | Glycine, Serine and Threonine Metabolism                     | 0.9251 | 0.8673 | 0.7965 | 1.2268 | 0.9935  | 1.0677 | 1.0065 | 1.1222  |
| serotonin                                      | Amino Acid           | Tryptophan Metabolism                                        | 0.2552 | 0.2891 | 0.3967 | 0.5058 | 1.1923  | 1.6304 | 1.1280 | 1.0326  |
| spermidine                                     | Amino Acid           | Polyamine Metabolism                                         | 0.8557 | 0.6762 | 0.6096 | 0.7462 | 0.3430  | 0.4273 | 0.2743 | 0.3401  |
| spermine                                       | Amino Acid           | Polyamine Metabolism                                         | 1.1962 | 1.2180 | 0.8675 | 1.0308 | 2.0277  | 3.0363 | 1.0188 | 2.3176  |
| sphingadienine                                 | Lipid                | Sphingolipid Synthesis                                       | 0.2086 | 0.2784 | 0.0753 | 0.8326 | 2.0518  | 2.3605 | 1.2713 | 0.30471 |
| sphinganine                                    | Lipid                | Sphingolipid Synthesis                                       | 0.5556 | 0.5200 | 0.3800 | 0.9931 | 0.8099  | 0.5716 | 0.3493 | 0.5360  |
| sphingomyelin (d17:1/14:0, d16:1/15:0)*        | Lipid                | Sphingomyelins                                               | 0.8447 | 1.1780 | 1.0507 | 1.0201 | 0.7171  | 0.4692 | 0.2675 | 0.3985  |
| sphingomyelin (d17:1/16:0, d18:1/15:0, d16:1/1 | Lipid                | Sphingomyelins                                               | 0.7974 | 0.9649 | 0.8361 | 0.9542 | 1.6953  | 1.0117 | 0.7184 | 0.8459  |
| sphingomyelin (d17:2/16:0, d18:2/15:0)*        | Lipid                | Sphingomyelins                                               | 0.8285 | 1.1072 | 0.9421 | 0.8787 | 1.3824  | 1.0000 | 0.7889 | 0.7889  |
| sphingomyelin (d18:0/18:0, d19:0/17:0)*        | Lipid                | Dihydrosphingomyelins                                        | 0.3830 | 0.5536 | 0.3230 | 0.9669 | 3.8199  | 2.2561 | 1.0331 | 1.3929  |
| sphingomyelin (d18:0/20:0, d16:0/22:0)*        | Lipid                | Dihydrosphingomyelins                                        | 0.6629 | 0.3731 | 0.4212 | 1.0518 | 2.3261  | 1.6246 | 0.7300 | 1.0710  |
| sphingomyelin (d18:1/14:0, d16:1/16:0)*        | Lipid                | Sphingomyelins                                               | 0.8456 | 0.9827 | 0.8398 | 0.9397 | 1.4776  | 1.0173 | 0.6966 | 0.7529  |
| sphingomyelin (d18:1/17:0, d17:1/18:0, d19:1/1 | Lipid                | Sphingomyelins                                               | 0.5764 | 0.6841 | 0.5616 | 0.7526 | 3.7016  | 2.6218 | 1.7746 | 1.9568  |
| sphingomyelin (d18:1/18:1, d18:2/18:0)         | Lipid                | Sphingomyelins                                               | 0.8870 | 1.0126 | 0.9103 | 1.0785 | 3.7901  | 3.1547 | 2.3919 | 2.2179  |
| sphingomyelin (d18:1/20:0, d16:1/22:0)*        | Lipid                | Sphingomyelins                                               | 0.6056 | 0.6945 | 0.4523 | 0.7551 | 5.2533  | 3.1266 | 2.4279 | 2.6233  |
| sphingomyelin (d18:1/21:0, d17:1/22:0, d16:1/2 | Lipid                | Sphingomyelins                                               | 0.5642 | 0.7268 | 0.5746 | 0.7256 | 2.7718  | 1.3121 | 0.7337 | 0.9683  |
| sphingomyelin (d18:1/22:1, d18:2/22:0, d16:1/2 | Lipid                | Sphingomyelins                                               | 0.7577 | 0.8761 | 0.6593 | 0.9317 | 2.5292  | 1.4390 | 0.9960 | 1.1316  |
| sphingomyelin (d18:1/22:2, d18:2/22:1, d16:1/2 | Lipid                | Sphingomyelins                                               | 0.6750 | 0.8453 | 0.8220 | 0.8907 | 2.2167  | 1.4872 | 0.9414 | 1.3041  |
| sphingomyelin (d18:1/24:1, d18:2/24:0)*        | Lipid                | Sphingomyelins                                               | 0.6835 | 0.9993 | 0.8500 | 0.9166 | 3.8686  | 2.2624 | 1.1399 | 1.5808  |
| sphingomyelin (d18:2/14:0, d18:1/14:1)*        | Lipid                | Sphingomyelins                                               | 1.0093 | 1.3103 | 1.2388 | 1.0296 | 0.8339  | 0.5402 | 0.3796 | 0.4708  |
| sphingomyelin (d18:2/16:0, d18:1/16:1)*        | Lipid                | Sphingomyelins                                               | 0.8686 | 0.9847 | 0.8296 | 0.9848 | 1.5218  | 1.0152 | 0.7030 | 0.7958  |
| sphingomyelin (d18:2/23:0, d18:1/23:1, d17:2/2 | Lipid                | Sphingomyelins                                               | 0.7437 | 0.9601 | 0.7586 | 0.8952 | 3.4842  | 1.7964 | 0.9573 | 1.3527  |
| sphingomyelin (d18:2/23:1)*                    | Lipid                | Sphingomyelins                                               | 0.6596 | 0.7626 | 0.8219 | 0.7823 | 2.6412  | 1.5151 | 0.8797 | 1.1113  |
| sphingomyelin (d18:2/24:1, d18:1/24:2)*        | Lipid                | Sphingomyelins                                               | 0.8721 | 1.0650 | 0.8799 | 0.9982 | 3.2938  | 2.0939 | 1.3248 | 1.5080  |
| sphingomyelin (d18:2/24:2)*                    | Lipid                | Sphingomyelins                                               | 0.8837 | 1.0127 | 0.9312 | 1.2832 | 2.7659  | 1.0424 | 1.2194 | 1.3956  |
| sphingosine                                    | Lipid                | Sphingosines                                                 | 0.4280 | 0.5087 | 0.2156 | 0.9862 | 2.0302  | 1.4848 | 0.7642 | 1.5380  |
| sphingosine 1-phosphate                        | Lipid                | Sphingosines                                                 | 0.4881 | 0.4881 | 0.4881 | 0.4881 | 0.4881  | 0.4881 | 0.4881 | 0.6218  |
| stachydrine                                    | Xenobiotics          | Food Component/Plant                                         | 1.5003 | 1.5355 | 1.7555 | 1.4751 | 1.0582  | 0.9195 | 0.8408 | 0.7829  |
| stearate (18:0)                                | Lipid                | Long Chain Saturated Fatty Acid                              | 0.7553 | 0.6134 | 1.5214 | 0.8446 | 4.0682  | 5.0039 | 3.7403 | 2.7531  |
| stearoyl ethanolamide                          | Lipid                | Endocannabinoid                                              | 0.6080 | 0.7589 | 0.6623 | 0.8400 | 1.7487  | 1.0741 | 0.7521 | 1.0053  |
| stearoyl sphingomyelin (d18:1/18:0)            | Lipid                | Sphingomyelins                                               | 0.7367 | 0.8128 | 0.5980 | 1.0126 | 4.4286  | 4.2925 | 3.3284 | 3.1126  |
| stearoylcarnitine (C18)                        | Lipid                | Fatty Acid Metabolism (Acyl Carnitine, Long Chain Saturated) | 0.8608 | 0.8638 | 1.9176 | 0.7532 | 0.8700  | 1.2017 | 0.5727 | 1.1300  |
| succinate                                      | Energy               | TCA Cycle                                                    | 1.2888 | 1.1122 | 1.0952 | 1.0359 | 0.6069  | 0.8642 | 0.8518 | 0.7364  |
| succinylcarnitine (C4-DC)                      | Energy               | TCA Cycle                                                    | 0.8414 | 0.6962 | 0.9662 | 0.8790 | 1.8235  | 2.4264 | 2.2817 | 2.2133  |
| sulfate*                                       | Xenobiotics          | Chemical                                                     | 1.1810 | 0.9921 | 0.4200 | 0.7710 | 6.6371  | 8.5433 | 5.5402 | 4.4835  |
| taurine                                        | Amino Acid           | Methionine, Cysteine, SAM and Taurine Metabolism             | 1.3521 | 1.1750 | 1.1123 | 1.3817 | 1.8637  | 1.0397 | 0.9603 | 2.1666  |
| taurochenodeoxycholate                         | Lipid                | Primary Bile Acid Metabolism                                 | 0.6233 | 0.6233 | 0.6233 | 0.6233 | 0.6233  | 0.6233 | 0.6233 | 0.6233  |
| thiamin (Vitamin B1)                           | Cofactors and Vitami |                                                              |        |        |        |        |         |        |        |         |

|                                       |              |                                                      |        |        |        |        |         |         |        |        |
|---------------------------------------|--------------|------------------------------------------------------|--------|--------|--------|--------|---------|---------|--------|--------|
| tryptophan                            | Amino Acid   | Tryptophan Metabolism                                | 0.7634 | 0.7744 | 0.7696 | 1.1199 | 0.8504  | 0.8730  | 0.7682 | 0.9327 |
| tryptophan betaine                    | Amino Acid   | Tryptophan Metabolism                                | 1.1572 | 1.0000 | 1.1357 | 1.0946 | 0.2660  | 0.2660  | 0.2660 | 0.2995 |
| tryptophylglycine                     | Peptide      | Dipeptide                                            | 0.4913 | 0.4269 | 0.4089 | 0.6532 | 0.9176  | 0.7249  | 0.4089 | 0.9422 |
| tyrosine                              | Amino Acid   | Tyrosine Metabolism                                  | 0.7428 | 0.7439 | 0.6785 | 1.2142 | 1.1971  | 1.1063  | 0.9966 | 1.1725 |
| tyrosylglycine                        | Peptide      | Dipeptide                                            | 0.3020 | 0.3577 | 0.1668 | 0.8011 | 1.0795  | 0.7305  | 0.5542 | 0.8897 |
| UDP-galactose                         | Carbohydrate | Nucleotide Sugar                                     | 1.4833 | 1.2556 | 0.9773 | 1.4871 | 0.9594  | 1.0227  | 1.3475 | 0.8897 |
| UDP-glucose                           | Carbohydrate | Nucleotide Sugar                                     | 2.2758 | 1.9276 | 1.4752 | 2.1006 | 0.7060  | 0.8257  | 0.9084 | 0.6013 |
| UDP-glucuronate                       | Carbohydrate | Nucleotide Sugar                                     | 0.5481 | 0.5419 | 0.6518 | 0.6964 | 0.8791  | 1.0095  | 0.9438 | 0.8863 |
| UDP-N-acetylglucosamine/galactosamine | Carbohydrate | Nucleotide Sugar                                     | 0.7456 | 0.5846 | 0.5611 | 0.9158 | 0.9204  | 1.3037  | 1.4391 | 1.3503 |
| uracil                                | Nucleotide   | Pyrimidine Metabolism, Uracil containing             | 0.9845 | 1.5594 | 2.7868 | 1.8673 | 0.4900  | 0.4654  | 0.9297 | 1.0155 |
| urate                                 | Nucleotide   | Purine Metabolism, (Hypo)Xanthine/Inosine containing | 1.2086 | 1.1335 | 1.1628 | 1.3200 | 1.4435  | 1.7119  | 1.4444 | 1.2252 |
| uridine                               | Nucleotide   | Pyrimidine Metabolism, Uracil containing             | 0.8877 | 1.0307 | 1.4773 | 1.3380 | 1.3190  | 1.3568  | 1.4126 | 1.5797 |
| uridine 3'-monophosphate (3'-UMP)     | Nucleotide   | Pyrimidine Metabolism, Uracil containing             | 0.3166 | 0.3166 | 0.3166 | 0.3166 | 1.2493  | 0.6674  | 0.9163 | 2.0880 |
| uridine 5'-diphosphate (UDP)          | Nucleotide   | Pyrimidine Metabolism, Uracil containing             | 1.7333 | 1.0561 | 0.5930 | 1.1123 | 3.8711  | 5.6883  | 2.8705 | 2.4162 |
| UMP                                   | Nucleotide   | Pyrimidine Metabolism, Uracil containing             | 1.6464 | 1.2562 | 0.8078 | 1.6313 | 0.8684  | 0.8357  | 0.9928 | 1.1826 |
| uridine 5'-triphosphate (UTP)         | Nucleotide   | Pyrimidine Metabolism, Uracil containing             | 1.1051 | 0.6693 | 0.2703 | 0.4009 | 10.7940 | 13.0267 | 3.0500 | 3.5430 |
| valine                                | Amino Acid   | Leucine, Isoleucine and Valine Metabolism            | 0.8188 | 0.8404 | 0.8592 | 1.0913 | 0.9232  | 0.9987  | 0.8415 | 0.9747 |
| valylglutamine                        | Peptide      | Dipeptide                                            | 0.5572 | 0.5572 | 0.5572 | 0.5572 | 0.8353  | 0.5572  | 0.5789 | 0.5572 |
| valylglycine                          | Peptide      | Dipeptide                                            | 0.2432 | 0.2244 | 0.1254 | 0.5227 | 1.4869  | 0.7190  | 0.4563 | 0.7273 |
| valylleucine                          | Peptide      | Dipeptide                                            | 0.2307 | 0.2307 | 0.2307 | 0.2307 | 0.8286  | 0.4182  | 0.2307 | 0.2307 |
| xanthine                              | Nucleotide   | Purine Metabolism, (Hypo)Xanthine/Inosine containing | 0.7572 | 0.8766 | 1.3643 | 1.2304 | 0.9495  | 0.9157  | 1.2128 | 1.1575 |
| xanthosine                            | Nucleotide   | Purine Metabolism, (Hypo)Xanthine/Inosine containing | 0.3498 | 0.5259 | 1.0934 | 0.8221 | 1.0340  | 1.2937  | 2.1802 | 1.2756 |



**Table S2: Metabolites that are significantly altered in persister cells.**

Cell Line: A375  
 Treatment: Vemurafenib (10 µM)  
 Treatment duration: 3 days

**Pathway Heat Map** This is the heat map associated with the statistical analysis of the data.  
 Indicates ratios, p- and q-values for each comparison.

|      |                                                                                                                    |
|------|--------------------------------------------------------------------------------------------------------------------|
| 0.55 | Green: indicates significant difference ( $p \leq 0.05$ ) between the groups shown, metabolite ratio of $< 1.00$   |
| 0.76 | Light Green: narrowly missed statistical cutoff for significance $0.05 < p < 0.10$ , metabolite ratio of $< 1.00$  |
| 1.71 | Red: indicates significant difference ( $p \leq 0.05$ ) between the groups shown; metabolite ratio of $\geq 1.00$  |
| 1.32 | Light Red: narrowly missed statistical cutoff for significance $0.05 < p < 0.10$ , metabolite ratio of $\geq 1.00$ |
| 1.20 | Non-colored text and cell: mean values are not significantly different for that comparison                         |

| Super Pathway | Sub Pathway                              | Biochemical Name                   | Fold of Change (VEM/Control) | Statistical Values |         |
|---------------|------------------------------------------|------------------------------------|------------------------------|--------------------|---------|
|               |                                          |                                    | Vemurafenib (VEM)            | p-value            | q-value |
|               | Glycine, Serine and Threonine Metabolism | glycine                            | 0.57                         | 0.000              | 0.000   |
|               |                                          | sarcosine                          | 0.06                         | 0.000              | 0.000   |
|               |                                          | dimethylglycine                    | 0.73                         | 0.005              | 0.003   |
|               |                                          | betaine                            | 0.66                         | 0.000              | 0.000   |
|               |                                          | serine                             | 1.10                         | 0.237              | 0.085   |
|               |                                          | N-acetylserine                     | 0.24                         | 0.000              | 0.000   |
|               |                                          | threonine                          | 0.86                         | 0.174              | 0.064   |
|               |                                          | N-acetylthreonine                  | 0.37                         | 0.000              | 0.000   |
|               | Alanine and Aspartate Metabolism         | alanine                            | 0.87                         | 0.160              | 0.060   |
|               |                                          | N-acetylalanine                    | 0.35                         | 0.000              | 0.000   |
|               |                                          | aspartate                          | 1.77                         | 0.000              | 0.000   |
|               |                                          | N-acetylaspargate (NAA)            | 0.62                         | 0.000              | 0.000   |
|               |                                          | asparagine                         | 1.17                         | 0.080              | 0.032   |
|               |                                          | N-acetylaspargine                  | 0.83                         | 0.169              | 0.063   |
|               |                                          | hydroxyasparagine**                | 0.39                         | 0.001              | 0.000   |
|               | Glutamate Metabolism                     | glutamate                          | 1.03                         | 0.589              | 0.187   |
|               |                                          | glutamine                          | 0.61                         | 0.003              | 0.002   |
|               |                                          | alpha-ketoglutarate*               | 0.34                         | 0.004              | 0.003   |
|               |                                          | N-acetylglutamate                  | 0.24                         | 0.000              | 0.000   |
|               |                                          | N-acetylglutamine                  | 0.36                         | 0.000              | 0.000   |
|               |                                          | 4-hydroxyglutamate                 | 0.24                         | 0.000              | 0.000   |
|               |                                          | glutamate, gamma-methyl ester      | 0.34                         | 0.000              | 0.000   |
|               |                                          | pyroglutamate*                     | 0.30                         | 0.000              | 0.000   |
|               |                                          | N-acetyl-aspartyl-glutamate (NAAG) | 0.77                         | 0.022              | 0.010   |
|               |                                          | beta-citrylglutamate               | 1.11                         | 0.183              | 0.067   |
|               |                                          | carboxyethyl-GABA                  | 9.71                         | 0.000              | 0.000   |
|               |                                          | 5-1-pyrroline-5-carboxylate        | 0.53                         | 0.090              | 0.036   |
|               | Histidine Metabolism                     | histidine                          | 1.34                         | 0.007              | 0.004   |
|               |                                          | 1-methylhistidine                  | 1.15                         | 0.267              | 0.094   |
|               |                                          | 3-methylhistidine                  | 0.40                         | 0.000              | 0.000   |
|               |                                          | N-acetylhistidine                  | 8.13                         | 0.000              | 0.000   |
|               |                                          | N-acetyl-3-methylhistidine*        | 8.46                         | 0.000              | 0.000   |
|               |                                          | N-acetyl-1-methylhistidine*        | 0.76                         | 0.270              | 0.095   |
|               |                                          | trans-urocanate                    | 1.32                         | 0.193              | 0.071   |
|               |                                          | imidazole propionate               | 0.05                         | 0.000              | 0.000   |
|               |                                          | formiminoglutamate                 | 1.57                         | 0.048              | 0.021   |
|               |                                          | imidazole lactate                  | 0.06                         | 0.000              | 0.000   |
|               |                                          | carnosine                          | 1.49                         | 0.001              | 0.001   |
|               |                                          | 1-methyl-4-imidazoleacetate        | 0.75                         | 0.011              | 0.006   |
|               |                                          | 1-methyl-5-imidazoleacetate        | 0.09                         | 0.000              | 0.000   |
|               |                                          | 1-ribosyl-imidazoleacetate*        | 0.41                         | 0.000              | 0.000   |
|               |                                          | 4-imidazoleacetate                 | 0.27                         | 0.000              | 0.000   |
|               |                                          | histidine methyl ester             | 0.91                         | 0.338              | 0.116   |
|               | Lysine Metabolism                        | lysine                             | 1.83                         | 0.000              | 0.000   |
|               |                                          | N2-acetyllysine                    | 6.64                         | 0.000              | 0.000   |
|               |                                          | N6-acetyllysine                    | 0.94                         | 0.568              | 0.182   |
|               |                                          | N6-methyllysine                    | 1.63                         | 0.000              | 0.000   |
|               |                                          | N6,N6-dimethyllysine               | 0.95                         | 0.450              | 0.148   |
|               |                                          | N6,N6,N6-trimethyllysine           | 0.96                         | 0.667              | 0.208   |
|               |                                          | hydroxy-N6,N6,N6-trimethyllysine*  | 0.93                         | 0.500              | 0.163   |
|               |                                          | 5-hydroxylysine                    | 2.34                         | 0.000              | 0.000   |
|               |                                          | 5-(galactosylhydroxy)-L-lysine     | 4.20                         | 0.000              | 0.000   |
|               |                                          | fructosyllsine                     | 1.41                         | 0.288              | 0.100   |
|               |                                          | saccharopine                       | 3.50                         | 0.000              | 0.000   |
|               |                                          | 2-aminoadipate                     | 2.29                         | 0.002              | 0.002   |
|               |                                          | glutaryl carnitine (C5-DC)         | 9.63                         | 0.000              | 0.000   |
|               |                                          | pipecolate                         | 0.62                         | 0.000              | 0.000   |
|               |                                          | 6-oxopiperidine-2-carboxylate      | 0.70                         | 0.004              | 0.002   |
|               |                                          | cadaverine                         | 0.87                         | 0.006              | 0.004   |
|               |                                          | N-acetyl-cadaverine                | 0.24                         | 0.007              | 0.004   |
|               |                                          | 5-aminovaleate                     | 0.39                         | 0.000              | 0.000   |
|               |                                          | N,N,N-trimethyl-5-aminovaleate     | 0.99                         | 0.896              | 0.270   |
|               | Phenylalanine Metabolism                 | phenylalanine                      | 1.21                         | 0.021              | 0.010   |
|               |                                          | N-acetylphenylalanine              | 0.50                         | 0.000              | 0.000   |
|               |                                          | 1-carboxyethylphenylalanine        | 0.23                         | 0.000              | 0.000   |
|               |                                          | phenylpyruvate                     | 1.37                         | 0.395              | 0.132   |
|               |                                          | phenyllactate (PLA)                | 0.40                         | 0.000              | 0.000   |
|               |                                          | phenethylamine                     | 5.48                         | 0.000              | 0.000   |
|               |                                          | tyrosine                           | 1.32                         | 0.016              | 0.008   |
|               |                                          | N-acetyltyrosine                   | 1.53                         | 0.000              | 0.000   |
|               |                                          | 1-carboxyethyltyrosine             | 0.09                         | 0.000              | 0.000   |

## Amino Acid

|                                                  |                                                  |      |       |       |
|--------------------------------------------------|--------------------------------------------------|------|-------|-------|
| Tyrosine Metabolism                              | 4-hydroxyphenylpyruvate                          | 2.24 | 0.000 | 0.000 |
|                                                  | 3-(4-hydroxyphenyl)lactate                       | 0.29 | 0.000 | 0.000 |
|                                                  | phenol sulfate                                   | 1.48 | 0.038 | 0.017 |
|                                                  | 3-methoxytyrosine                                | 0.69 | 0.063 | 0.026 |
|                                                  | o-Tyrosine                                       | 1.57 | 0.345 | 0.117 |
|                                                  | O-methyltyrosine                                 | 0.78 | 0.009 | 0.005 |
| Tryptophan Metabolism                            | tryptophan                                       | 1.00 | 0.902 | 0.271 |
|                                                  | N-acetyltryptophan                               | 1.00 | 1.000 | 0.291 |
|                                                  | C-glycosyltryptophan                             | 4.42 | 0.000 | 0.000 |
|                                                  | tryptophan betaine                               | 0.25 | 0.000 | 0.000 |
|                                                  | kynurenine                                       | 0.81 | 0.051 | 0.022 |
|                                                  | kynurenate                                       | 4.88 | 0.000 | 0.000 |
|                                                  | serotonin                                        | 3.44 | 0.000 | 0.000 |
|                                                  | tryptamine                                       | 1.39 | 0.244 | 0.087 |
|                                                  | indolelactate                                    | 0.61 | 0.033 | 0.015 |
|                                                  | indoleacetate                                    | 1.92 | 0.006 | 0.003 |
|                                                  | leucine                                          | 1.28 | 0.004 | 0.002 |
| Leucine, Isoleucine and Valine Metabolism        | N-acetylleucine                                  | 0.48 | 0.000 | 0.000 |
|                                                  | 1-carboxyethylleucine                            | 0.41 | 0.000 | 0.000 |
|                                                  | 4-methyl-2-oxopentanoate                         | 0.47 | 0.000 | 0.000 |
|                                                  | alpha-hydroxyisocaproate                         | 0.45 | 0.000 | 0.000 |
|                                                  | isovalerylglycine                                | 1.19 | 0.762 | 0.234 |
|                                                  | isovalerylcarnitine (C5)                         | 1.56 | 0.018 | 0.008 |
|                                                  | beta-hydroxyisovalerate                          | 0.32 | 0.000 | 0.000 |
|                                                  | beta-hydroxyisovaleroylcarnitine                 | 2.84 | 0.000 | 0.000 |
|                                                  | 3-methylglutaconate                              | 1.08 | 0.391 | 0.131 |
|                                                  | isoleucine                                       | 1.26 | 0.004 | 0.003 |
|                                                  | N-acetylisoleucine                               | 0.46 | 0.005 | 0.003 |
|                                                  | 1-carboxyethylisoleucine                         | 0.14 | 0.000 | 0.000 |
|                                                  | 3-methyl-2-oxovalerate                           | 0.41 | 0.006 | 0.003 |
|                                                  | 2-hydroxy-3-methylvalerate                       | 0.38 | 0.000 | 0.000 |
|                                                  | 2-methylbutyrylcarnitine (C5)                    | 1.54 | 0.008 | 0.004 |
|                                                  | 2-methylbutyrylglycine                           | 0.75 | 0.114 | 0.044 |
|                                                  | tiglylcarnitine (C5:1-DC)                        | 2.65 | 0.000 | 0.000 |
|                                                  | 3-hydroxy-2-ethylpropionate                      | 0.99 | 0.976 | 0.290 |
|                                                  | ethylmalonate                                    | 0.13 | 0.000 | 0.000 |
|                                                  | methylsuccinate                                  | 0.77 | 0.048 | 0.021 |
|                                                  | valine                                           | 1.04 | 0.573 | 0.183 |
|                                                  | N-acetylvaline                                   | 0.60 | 0.000 | 0.000 |
|                                                  | 1-carboxyethylvaline                             | 0.14 | 0.000 | 0.000 |
|                                                  | 3-methyl-2-oxobutyrates                          | 0.45 | 0.005 | 0.003 |
|                                                  | alpha-hydroxyisovalerate                         | 0.23 | 0.000 | 0.000 |
|                                                  | isobutyrylcarnitine (C4)                         | 1.99 | 0.000 | 0.000 |
|                                                  | 3-hydroxyisobutyrate                             | 0.96 | 0.822 | 0.251 |
|                                                  | 2,3-dihydroxy-2-methylbutyrate                   | 0.35 | 0.000 | 0.000 |
| Methionine, Cysteine, SAM and Taurine Metabolism | methionine                                       | 1.26 | 0.007 | 0.004 |
|                                                  | N-acetylmethionine                               | 1.72 | 0.001 | 0.001 |
|                                                  | N-formylmethionine                               | 1.03 | 0.759 | 0.233 |
|                                                  | S-methylmethionine                               | 1.23 | 0.370 | 0.125 |
|                                                  | methionine sulfone                               | 0.41 | 0.000 | 0.000 |
|                                                  | methionine sulfoxide                             | 1.71 | 0.002 | 0.001 |
|                                                  | N-acetylmethionine sulfoxide                     | 5.35 | 0.000 | 0.000 |
|                                                  | S-adenosylmethionine (SAM)                       | 0.82 | 0.037 | 0.016 |
|                                                  | S-adenosylhomocysteine (SAH)                     | 0.66 | 0.000 | 0.000 |
|                                                  | 2,3-dihydroxy-5-methylthio-4-pentenoate (DMTPA)* | 0.61 | 0.000 | 0.000 |
|                                                  | homocysteine                                     | 0.64 | 0.023 | 0.011 |
|                                                  | cystathionine                                    | 0.15 | 0.000 | 0.000 |
|                                                  | cysteine                                         | 1.06 | 0.591 | 0.188 |
|                                                  | N-acetylcysteine                                 | 1.69 | 0.010 | 0.005 |
|                                                  | S-methylcysteine sulfoxide                       | 0.61 | 0.041 | 0.018 |
|                                                  | S-carboxyethylcysteine                           | 1.63 | 0.001 | 0.001 |
|                                                  | hypotaurine                                      | 0.93 | 0.437 | 0.145 |
|                                                  | taurine                                          | 1.20 | 0.441 | 0.145 |
|                                                  | N-acetyltaurine                                  | 0.34 | 0.000 | 0.000 |
| Urea cycle; Arginine and Proline Metabolism      | arginine                                         | 1.97 | 0.000 | 0.000 |
|                                                  | argininosuccinate                                | 0.66 | 0.081 | 0.033 |
|                                                  | ornithine                                        | 1.75 | 0.017 | 0.008 |
|                                                  | 3-amino-2-piperidone                             | 4.08 | 0.000 | 0.000 |
|                                                  | 2-oxoarginine*                                   | 1.25 | 0.096 | 0.038 |
|                                                  | citrulline                                       | 0.78 | 0.012 | 0.006 |
|                                                  | proline                                          | 0.52 | 0.000 | 0.000 |
|                                                  | dimethylarginine (SDMA + ADMA)                   | 1.58 | 0.004 | 0.002 |
|                                                  | N-acetylarginine                                 | 1.31 | 0.002 | 0.001 |
|                                                  | N-delta-acetylornithine                          | 0.54 | 0.000 | 0.000 |
|                                                  | trans-4-hydroxyproline                           | 0.88 | 0.243 | 0.087 |
|                                                  | pro-hydroxy-pro                                  | 0.37 | 0.001 | 0.000 |
|                                                  | N-methylproline                                  | 0.73 | 0.047 | 0.020 |
|                                                  | N,N,N-trimethyl-alanylproline betaine (TMAP)     | 5.00 | 0.000 | 0.000 |
|                                                  | N-monomethylarginine                             | 3.09 | 0.000 | 0.000 |
| Creatine Metabolism                              | creatine                                         | 1.22 | 0.006 | 0.004 |
|                                                  | creatinine                                       | 1.29 | 0.010 | 0.005 |
|                                                  | creatine phosphate                               | 0.72 | 0.010 | 0.005 |
|                                                  | putrescine                                       | 0.07 | 0.000 | 0.000 |
|                                                  | N-acetylputrescine                               | 0.31 | 0.007 | 0.004 |
|                                                  | N-acetyl-isoputrescine                           | 4.13 | 0.000 | 0.000 |
|                                                  | spermidine                                       | 0.48 | 0.000 | 0.000 |

|              |                                                      |                                                               |        |       |       |
|--------------|------------------------------------------------------|---------------------------------------------------------------|--------|-------|-------|
|              | Polyamine Metabolism                                 | N(1)-acetylspermidine                                         | 0.12   | 0.000 | 0.000 |
|              |                                                      | diacetylspermidine*                                           | 1.00   | 1.000 | 0.291 |
|              |                                                      | spermine                                                      | 1.95   | 0.077 | 0.031 |
|              |                                                      | N(1)-acetylspermine                                           | 0.82   | 0.155 | 0.058 |
|              |                                                      | N1,N12-diacetylspermine                                       | 1.00   | 1.000 | 0.291 |
|              |                                                      | 5-methylthioadenosine (MTA)                                   | 0.83   | 0.021 | 0.010 |
|              |                                                      | 4-acetamidobutanoate                                          | 1.45   | 0.012 | 0.006 |
|              | Guanidino and Acetamido Metabolism                   | 1-methylguanidine                                             | 1.00   | 0.985 | 0.291 |
|              |                                                      | 4-guanidinobutanoate                                          | 0.27   | 0.000 | 0.000 |
|              | Glutathione Metabolism                               | glutathione, reduced (GSH)                                    | 1.22   | 0.048 | 0.021 |
|              |                                                      | glutathione, oxidized (GSSG)                                  | 1.07   | 0.440 | 0.145 |
|              |                                                      | cyclic dGSH                                                   | 0.84   | 0.060 | 0.025 |
|              |                                                      | cysteine-glutathione disulfide                                | 1.48   | 0.124 | 0.048 |
|              |                                                      | S-methylglutathione                                           | 0.38   | 0.000 | 0.000 |
|              |                                                      | cysteinylglycine                                              | 0.64   | 0.000 | 0.000 |
|              |                                                      | 5-oxoproline                                                  | 0.84   | 0.025 | 0.012 |
|              |                                                      | 2-hydroxybutyrate/2-hydroxyisobutyrate                        | 0.73   | 0.000 | 0.000 |
|              |                                                      | ophthalmate                                                   | 9.86   | 0.000 | 0.000 |
|              |                                                      | S-(1,2-dicarboxyethyl)glutathione                             | 0.37   | 0.000 | 0.000 |
|              |                                                      | 4-hydroxy-nonenal-glutathione                                 | 2.11   | 0.000 | 0.000 |
|              |                                                      | CoA-glutathione*                                              | 2.53   | 0.000 | 0.000 |
|              |                                                      | gamma-glutamylcysteine                                        | 0.72   | 0.010 | 0.005 |
|              |                                                      | gamma-glutamylglutamate                                       | 1.39   | 0.019 | 0.009 |
| Peptide      | Gamma-glutamyl Amino Acid                            | gamma-glutamylglutamine                                       | 5.98   | 0.000 | 0.000 |
|              |                                                      | gamma-glutamylhistidine                                       | 1.69   | 0.064 | 0.027 |
|              |                                                      | gamma-glutamylisoleucine*                                     | 3.02   | 0.000 | 0.000 |
|              |                                                      | gamma-glutamylleucine                                         | 4.72   | 0.000 | 0.000 |
|              |                                                      | gamma-glutamylmethionine                                      | 2.55   | 0.000 | 0.000 |
|              |                                                      | gamma-glutamylphenylalanine                                   | 0.83   | 0.100 | 0.039 |
|              |                                                      | gamma-glutamylthreonine                                       | 10.50  | 0.000 | 0.000 |
|              |                                                      | gamma-glutamyltryptophan                                      | 1.00   | 1.000 | 0.291 |
|              |                                                      | gamma-glutamyltyrosine                                        | 0.77   | 0.209 | 0.076 |
|              |                                                      | gamma-glutamylvaline                                          | 4.97   | 0.000 | 0.000 |
|              | Dipeptide                                            | alanylleucine                                                 | 1.29   | 0.291 | 0.101 |
|              |                                                      | glycylisoleucine                                              | 0.64   | 0.131 | 0.050 |
|              |                                                      | glycylleucine                                                 | 1.44   | 0.085 | 0.034 |
|              |                                                      | glycylvaline                                                  | 1.20   | 0.343 | 0.117 |
|              |                                                      | isoleucylglycine                                              | 2.98   | 0.001 | 0.000 |
|              |                                                      | leucylglycine                                                 | 2.67   | 0.006 | 0.003 |
|              |                                                      | phenylalanylalanine                                           | 2.96   | 0.001 | 0.001 |
|              |                                                      | phenylalanylglycine                                           | 3.01   | 0.000 | 0.000 |
|              |                                                      | prolylglycine                                                 | 0.73   | 0.034 | 0.015 |
|              |                                                      | threonylphenylalanine                                         | 1.00   | 1.000 | 0.291 |
|              |                                                      | tryptophylglycine                                             | 1.51   | 0.085 | 0.034 |
|              |                                                      | tyrosylglycine                                                | 2.00   | 0.010 | 0.005 |
|              |                                                      | valylglutamine                                                | 1.13   | 0.472 | 0.155 |
|              |                                                      | valylglycine                                                  | 3.04   | 0.002 | 0.001 |
|              |                                                      | valylleucine                                                  | 1.85   | 0.096 | 0.038 |
|              |                                                      | leucylglutamine*                                              | 2.15   | 0.004 | 0.002 |
|              | Acetylated Peptides                                  | phenylacetylglycine                                           | 0.83   | 0.401 | 0.133 |
| Carbohydrate | Glycolysis, Gluconeogenesis, and Pyruvate Metabolism | glucose                                                       | 51.27  | 0.011 | 0.006 |
|              |                                                      | glucose 6-phosphate                                           | 30.81  | 0.000 | 0.000 |
|              |                                                      | fructose 1,6-diphosphate/glucose 1,6-diphosphate/myo-inositol | 11.39  | 0.000 | 0.000 |
|              |                                                      | dihydroxyacetone phosphate (DHAP)                             | 2.35   | 0.866 | 0.263 |
|              |                                                      | 3-phosphoglycerate                                            | 0.91   | 0.592 | 0.188 |
|              |                                                      | phosphoenolpyruvate (PEP)                                     | 16.43  | 0.000 | 0.000 |
|              |                                                      | pyruvate                                                      | 0.17   | 0.000 | 0.000 |
|              |                                                      | lactate                                                       | 1.06   | 0.520 | 0.169 |
|              |                                                      | glycerate                                                     | 5.03   | 0.000 | 0.000 |
|              |                                                      | 6-phosphogluconate                                            | 24.28  | 0.000 | 0.000 |
|              | Pentose Phosphate Pathway                            | sedoheptulose-7-phosphate                                     | 5.77   | 0.000 | 0.000 |
|              | Pentose Metabolism                                   | ribose                                                        | 2.49   | 0.001 | 0.001 |
|              |                                                      | ribitol                                                       | 0.15   | 0.000 | 0.000 |
|              |                                                      | ribonate                                                      | 0.23   | 0.000 | 0.000 |
|              |                                                      | ribulose/xylulose                                             | 0.60   | 0.002 | 0.002 |
|              |                                                      | arabinose                                                     | 3.10   | 0.000 | 0.000 |
|              |                                                      | arabitol/xylitol                                              | 0.94   | 0.504 | 0.164 |
|              |                                                      | arabonate/xylonate                                            | 1.62   | 0.100 | 0.039 |
|              |                                                      | ribulonate/xylulonate/lyxonate*                               | 2.16   | 0.003 | 0.002 |
|              | Disaccharides and Oligosaccharides                   | lactose                                                       | 9.93   | 0.000 | 0.000 |
|              | Fructose, Mannose and Galactose Metabolism           | fructose                                                      | 18.60  | 0.000 | 0.000 |
|              |                                                      | mannitol/sorbitol                                             | 0.57   | 0.002 | 0.001 |
|              |                                                      | mannose                                                       | 9.42   | 0.262 | 0.093 |
|              |                                                      | galactitol (dulcitol)                                         | 3.06   | 0.000 | 0.000 |
|              |                                                      | galactonate                                                   | 0.24   | 0.000 | 0.000 |
|              | Nucleotide Sugar                                     | adenosine-5'-diphosphoglucose                                 | 7.34   | 0.000 | 0.000 |
|              |                                                      | UDP-glucose                                                   | 0.39   | 0.000 | 0.000 |
|              |                                                      | UDP-galactose                                                 | 0.81   | 0.092 | 0.036 |
|              |                                                      | UDP-glucuronate                                               | 1.53   | 0.000 | 0.000 |
|              |                                                      | guanosine 5'-diphospho-fucose                                 | 1.49   | 0.001 | 0.000 |
|              |                                                      | UDP-N-acetylglucosamine/galactosamine                         | 1.79   | 0.001 | 0.001 |
|              |                                                      | cytidine 5'-monophospho-N-acetylneuraminic acid               | 0.71   | 0.003 | 0.002 |
|              |                                                      | glucosamine-6-phosphate                                       | 118.21 | 0.000 | 0.000 |
|              |                                                      | glucuronate                                                   | 1.17   | 0.265 | 0.094 |
|              |                                                      | N-acetylglucosamine 6-phosphate                               | 7.44   | 0.000 | 0.000 |
|              |                                                      | N-acetyl-glucosamine 1-phosphate                              | 0.47   | 0.000 | 0.000 |

|  |                                                     |                                             |       |       |       |
|--|-----------------------------------------------------|---------------------------------------------|-------|-------|-------|
|  | Aminosugar Metabolism                               | N-acetylneuramate                           | 0.10  | 0.000 | 0.000 |
|  |                                                     | N-acetylglucosaminylasparagine              | 0.89  | 0.078 | 0.032 |
|  |                                                     | erythronate*                                | 0.19  | 0.000 | 0.000 |
|  |                                                     | N-acetylglucosamine/N-acetylgalactosamine   | 5.26  | 0.000 | 0.000 |
|  |                                                     | N-glycolylneuramate                         | 0.09  | 0.000 | 0.000 |
|  |                                                     | N6-carboxymethyllysine                      | 0.99  | 0.611 | 0.193 |
|  | Advanced Glycation End-product                      | citrate                                     | 2.29  | 0.000 | 0.000 |
|  |                                                     | aconitate [cis or trans]                    | 3.80  | 0.000 | 0.000 |
|  |                                                     | isocitrate                                  | 13.41 | 0.000 | 0.000 |
|  |                                                     | alpha-ketoglutarate                         | 0.38  | 0.000 | 0.000 |
|  |                                                     | succinylcarnitine (C4-DC)                   | 2.59  | 0.000 | 0.000 |
|  |                                                     | succinate                                   | 0.68  | 0.000 | 0.000 |
|  |                                                     | fumarate                                    | 0.91  | 0.383 | 0.129 |
|  |                                                     | malate                                      | 1.12  | 0.187 | 0.069 |
|  |                                                     | oxaloacetate                                | 0.84  | 0.534 | 0.173 |
|  |                                                     | 2-methylcitrate/homocitrate                 | 2.66  | 0.000 | 0.000 |
|  | TCA Cycle                                           | acetylphosphate                             | 10.20 | 0.066 | 0.027 |
|  |                                                     | phosphate                                   | 1.39  | 0.001 | 0.000 |
|  | Oxidative Phosphorylation                           | malonylcarnitine                            | 6.35  | 0.000 | 0.000 |
|  |                                                     | acetyl CoA                                  | 3.62  | 0.001 | 0.001 |
|  |                                                     | oleoyl CoA                                  | 1.85  | 0.014 | 0.007 |
|  |                                                     | arachidonoyl CoA                            | 2.47  | 0.002 | 0.001 |
|  | Fatty Acid Metabolism                               | butyrate/isobutyrate (4:0)                  | 2.83  | 0.082 | 0.033 |
|  |                                                     | heptanoate (7:0)                            | 1.80  | 0.000 | 0.000 |
|  |                                                     | (2 or 3)-decanoate (10:1n7 or n8)           | 1.43  | 0.181 | 0.067 |
|  |                                                     | 5-dodecanoate (12:1n7)                      | 0.64  | 0.118 | 0.046 |
|  | Short Chain Fatty Acid                              | myristate (14:0)                            | 1.72  | 0.341 | 0.117 |
|  |                                                     | pentadecanoate (15:0)                       | 3.53  | 0.035 | 0.015 |
|  |                                                     | palmitate (16:0)                            | 3.06  | 0.017 | 0.008 |
|  |                                                     | margarate (17:0)                            | 6.14  | 0.014 | 0.007 |
|  |                                                     | stearate (18:0)                             | 4.17  | 0.006 | 0.004 |
|  |                                                     | nonadecanoate (19:0)                        | 4.98  | 0.031 | 0.014 |
|  |                                                     | arachidate (20:0)                           | 2.57  | 0.144 | 0.054 |
|  |                                                     | myristoleate (14:1n5)                       | 1.14  | 0.676 | 0.211 |
|  |                                                     | palmitoleate (16:1n7)                       | 3.07  | 0.120 | 0.046 |
|  |                                                     | 10-heptadecenoate (17:1n7)                  | 8.44  | 0.015 | 0.007 |
|  |                                                     | oleate/vaccenate (18:1)                     | 6.40  | 0.013 | 0.006 |
|  |                                                     | 10-nonadecenoate (19:1n9)                   | 8.64  | 0.011 | 0.006 |
|  |                                                     | eicosenoate (20:1)                          | 4.16  | 0.057 | 0.024 |
|  |                                                     | erucate (22:1n9)                            | 2.63  | 0.139 | 0.053 |
|  |                                                     | eicosapentaenoate (EPA; 20:5n3)             | 34.92 | 0.003 | 0.002 |
|  |                                                     | heneicosapentaenoate (21:5n3)               | 21.96 | 0.001 | 0.001 |
|  |                                                     | docosapentaenoate (n3 DPA; 22:5n3)          | 35.48 | 0.002 | 0.001 |
|  |                                                     | docosahexaenoate (DHA; 22:6n3)              | 13.02 | 0.009 | 0.005 |
|  |                                                     | docosatrienoate (22:3n3)                    | 7.69  | 0.030 | 0.014 |
|  |                                                     | nisinate (24:6n3)                           | 2.90  | 0.161 | 0.060 |
|  |                                                     | hexadecadienoate (16:2n6)                   | 6.56  | 0.006 | 0.003 |
|  |                                                     | linoleate (18:2n6)                          | 10.78 | 0.007 | 0.004 |
|  |                                                     | linolenate [alpha or gamma; (18:3n3 or 6)]  | 2.75  | 0.099 | 0.039 |
|  |                                                     | dihomo-linoleate (20:2n6)                   | 16.02 | 0.003 | 0.002 |
|  |                                                     | dihomo-linolenate (20:3n3 or n6)            | 23.01 | 0.001 | 0.001 |
|  |                                                     | arachidonate (20:4n6)                       | 50.75 | 0.001 | 0.001 |
|  |                                                     | docosatrienoate (22:3n6)*                   | 11.09 | 0.006 | 0.004 |
|  |                                                     | docosapentaenoate (n6 DPA; 22:5n6)          | 17.59 | 0.002 | 0.001 |
|  |                                                     | docosadienoate (22:2n6)                     | 2.86  | 0.121 | 0.047 |
|  |                                                     | mead acid (20:3n9)                          | 20.09 | 0.002 | 0.001 |
|  |                                                     | (12 or 13)-methylmyristate (a15:0 or i15:0) | 2.24  | 0.107 | 0.042 |
|  |                                                     | (14 or 15)-methylpalmitate (a17:0 or i17:0) | 4.69  | 0.025 | 0.012 |
|  |                                                     | (16 or 17)-methylstearate (a19:0 or i19:0)  | 4.11  | 0.050 | 0.021 |
|  |                                                     | dimethylmalonic acid                        | 1.26  | 0.615 | 0.194 |
|  |                                                     | glutarate (C5-DC)                           | 0.96  | 0.540 | 0.175 |
|  |                                                     | 2-hydroxyglutarate                          | 0.55  | 0.001 | 0.001 |
|  |                                                     | 2-hydroxyadipate                            | 0.65  | 0.316 | 0.109 |
|  |                                                     | 3-hydroxyadipate*                           | 1.28  | 0.137 | 0.052 |
|  |                                                     | maleate                                     | 0.84  | 0.198 | 0.072 |
|  |                                                     | dodecadienoate (12:2)*                      | 2.22  | 0.011 | 0.005 |
|  |                                                     | butyrylcarnitine (C4)                       | 0.61  | 0.001 | 0.001 |
|  |                                                     | propionylcarnitine (C3)                     | 0.94  | 0.479 | 0.157 |
|  |                                                     | methylmalonate (MMA)                        | 2.20  | 0.001 | 0.001 |
|  |                                                     | N-palmitoylglycine                          | 0.18  | 0.035 | 0.015 |
|  | Fatty Acid Metabolism (Acyl Carnitine, Short Chain) | acetylcarnitine (C2)                        | 1.05  | 0.940 | 0.281 |
|  |                                                     | hexanoylcarnitine (C6)                      | 1.23  | 0.195 | 0.072 |
|  |                                                     | octanoylcarnitine (C8)                      | 1.37  | 0.221 | 0.080 |
|  |                                                     | decanoylcarnitine (C10)                     | 0.63  | 0.149 | 0.056 |
|  |                                                     | laurylcarnitine (C12)                       | 0.41  | 0.002 | 0.001 |
|  |                                                     | myristoylcarnitine (C14)                    | 0.26  | 0.000 | 0.000 |
|  |                                                     | pentadecanoylcarnitine (C15)*               | 0.69  | 0.112 | 0.044 |
|  |                                                     | palmitoylcarnitine (C16)                    | 0.40  | 0.001 | 0.001 |
|  |                                                     | margaroylcarnitine (C17)*                   | 0.94  | 0.880 | 0.266 |
|  |                                                     | stearoylcarnitine (C18)                     | 0.86  | 0.611 | 0.193 |
|  |                                                     | arachidoylcarnitine (C20)*                  | 0.70  | 0.312 | 0.108 |
|  |                                                     | cis-4-decenoylcarnitine (C10:1)             | 1.17  | 0.895 | 0.270 |
|  |                                                     | 5-dodecenoylcarnitine (C12:1)               | 0.70  | 0.157 | 0.059 |
|  |                                                     | myristoleoylcarnitine (C14:1)*              | 0.94  | 0.916 | 0.275 |
|  |                                                     | palmitoleoylcarnitine (C16:1)*              | 0.50  | 0.018 | 0.009 |
|  |                                                     | oleoylcarnitine (C18:1)                     | 0.69  | 0.165 | 0.062 |



|       |                                                         |                                                |       |       |       |
|-------|---------------------------------------------------------|------------------------------------------------|-------|-------|-------|
| Lipid | Fatty Acid Metabolism (Acyl Carnitine, Polyunsaturated) | eicosenoylcarnitine (C20:1)*                   | 0.50  | 0.031 | 0.014 |
|       |                                                         | erucoylcarnitine (C22:1)*                      | 0.80  | 0.316 | 0.109 |
|       |                                                         | linoleoylcarnitine (C18:2)*                    | 1.56  | 0.147 | 0.056 |
|       |                                                         | linolenoylcarnitine (C18:3)*                   | 0.47  | 0.006 | 0.003 |
|       |                                                         | dihomo-linoleoylcarnitine (C20:2)*             | 0.91  | 0.723 | 0.224 |
|       |                                                         | arachidonoylcarnitine (C20:4)                  | 1.25  | 0.552 | 0.178 |
|       |                                                         | dihomo-linolenoylcarnitine (C20:3n3 or 6)*     | 1.40  | 0.327 | 0.113 |
|       |                                                         | adrenoylcarnitine (C22:4)*                     | 1.33  | 0.550 | 0.177 |
|       | Fatty Acid Metabolism (Acyl Carnitine, Hydroxy)         | docosapentaenoylcarnitine (C22:5n3)*           | 1.20  | 0.747 | 0.231 |
|       |                                                         | docosahexaenoylcarnitine (C22:6)*              | 0.35  | 0.045 | 0.020 |
|       |                                                         | (R)-3-hydroxybutyrylcarnitine                  | 1.68  | 0.000 | 0.000 |
|       |                                                         | (S)-3-hydroxybutyrylcarnitine                  | 0.87  | 0.229 | 0.082 |
|       |                                                         | 3-hydroxyhexanoylcarnitine (1)                 | 3.41  | 0.000 | 0.000 |
|       |                                                         | 3-hydroxydecanoylcarnitine                     | 1.75  | 0.029 | 0.013 |
|       | Carnitine Metabolism                                    | 3-hydroxypalmitoylcarnitine                    | 0.61  | 0.054 | 0.023 |
|       |                                                         | 3-hydroxyoleoylcarnitine                       | 1.30  | 0.339 | 0.116 |
|       | Ketone Bodies                                           | deoxycarnitine                                 | 0.92  | 0.332 | 0.114 |
|       |                                                         | carnitine                                      | 1.72  | 0.002 | 0.001 |
|       | Fatty Acid Metabolism (Acyl Choline)                    | 3-hydroxybutyrate (BHBA)                       | 1.58  | 0.004 | 0.002 |
|       |                                                         | palmitoylcholine                               | 3.00  | 0.008 | 0.004 |
|       |                                                         | oleoylcholine                                  | 4.46  | 0.000 | 0.000 |
|       |                                                         | palmitoleoylcholine                            | 3.24  | 0.002 | 0.001 |
|       |                                                         | linoleoylcholine*                              | 2.64  | 0.002 | 0.002 |
|       |                                                         | docosahexaenoylcholine                         | 7.30  | 0.000 | 0.000 |
|       |                                                         | arachidonoylcholine                            | 1.00  | 1.000 | 0.291 |
|       |                                                         | 4-hydroxybutyrate (GHB)                        | 0.84  | 0.216 | 0.078 |
|       | Fatty Acid, Monohydroxy                                 | 2-hydroxypalmitate                             | 2.86  | 0.093 | 0.037 |
|       |                                                         | 2-hydroxystearate                              | 3.27  | 0.067 | 0.028 |
|       |                                                         | 3-hydroxyhexanoate                             | 1.01  | 0.902 | 0.271 |
|       |                                                         | 3-hydroxyoctanoate                             | 1.01  | 0.937 | 0.281 |
|       |                                                         | 3-hydroxydecanoate                             | 1.21  | 0.445 | 0.146 |
|       |                                                         | 3-hydroxytridecanoate                          | 2.61  | 0.009 | 0.005 |
|       |                                                         | 3-hydroxylaurate                               | 1.11  | 0.648 | 0.203 |
|       |                                                         | 3-hydroxymyristate                             | 1.51  | 0.357 | 0.121 |
|       |                                                         | 3-hydroxypalmitate                             | 2.20  | 0.236 | 0.085 |
|       |                                                         | 3-hydroxystearate                              | 1.99  | 0.222 | 0.080 |
|       |                                                         | 3-hydroxyoleate*                               | 4.11  | 0.077 | 0.031 |
|       |                                                         | 9-hydroxystearate                              | 0.50  | 0.433 | 0.144 |
|       | Fatty Acid, Dihydroxy                                   | 2S,3R-dihydroxybutyrate                        | 0.57  | 0.202 | 0.074 |
|       |                                                         | 2R,3R-dihydroxybutyrate                        | 0.61  | 0.010 | 0.005 |
|       |                                                         | 2,4-dihydroxybutyrate                          | 0.39  | 0.000 | 0.000 |
|       | Endocannabinoid                                         | oleoyl ethanolamide                            | 3.55  | 0.000 | 0.000 |
|       |                                                         | palmitoyl ethanolamide                         | 1.69  | 0.007 | 0.004 |
|       |                                                         | stearoyl ethanolamide                          | 1.60  | 0.023 | 0.011 |
|       |                                                         | arachidonoyl ethanolamide                      | 3.13  | 0.022 | 0.010 |
|       |                                                         | N-myristoyltaurine*                            | 2.91  | 0.036 | 0.016 |
|       |                                                         | N-arachidonoyltaurine                          | 5.96  | 0.053 | 0.022 |
|       |                                                         | N-oleoyltaurine                                | 11.58 | 0.007 | 0.004 |
|       |                                                         | N-stearoyltaurine                              | 8.88  | 0.013 | 0.006 |
|       |                                                         | N-palmitoyltaurine                             | 9.83  | 0.013 | 0.006 |
|       |                                                         | N-linoleoyltaurine*                            | 7.98  | 0.026 | 0.012 |
|       |                                                         | linoleoyl ethanolamide                         | 4.89  | 0.068 | 0.028 |
|       |                                                         | palmitoleoyl ethanolamide*                     | 1.43  | 0.379 | 0.127 |
|       | Inositol Metabolism                                     | N-oleoylserine                                 | 0.74  | 0.794 | 0.243 |
|       |                                                         | myo-inositol                                   | 1.09  | 0.268 | 0.094 |
|       | Phospholipid Metabolism                                 | inositol 1-phosphate (I1P)                     | 6.60  | 0.000 | 0.000 |
|       |                                                         | choline                                        | 2.03  | 0.000 | 0.000 |
|       |                                                         | choline phosphate                              | 1.04  | 0.637 | 0.200 |
|       |                                                         | cytidine 5'-diphosphocholine                   | 2.00  | 0.000 | 0.000 |
|       |                                                         | glycerophosphorylcholine (GPC)                 | 6.62  | 0.000 | 0.000 |
|       |                                                         | phosphoethanolamine                            | 37.36 | 0.000 | 0.000 |
|       |                                                         | cytidine 5'-diphosphoethanolamine              | 2.98  | 0.000 | 0.000 |
|       |                                                         | glycerophosphoethanolamine                     | 3.64  | 0.000 | 0.000 |
|       |                                                         | glycerophosphoserine*                          | 0.42  | 0.000 | 0.000 |
|       |                                                         | glycerophosphoinositol*                        | 1.77  | 0.000 | 0.000 |
|       |                                                         | trimethylamine N-oxide                         | 0.55  | 0.000 | 0.000 |
|       |                                                         | 1-myristoyl-2-palmitoyl-GPC (14:0/16:0)        | 1.51  | 0.004 | 0.003 |
|       | Phosphatidylcholine (PC)                                | 1-myristoyl-2-arachidonoyl-GPC (14:0/20:4)*    | 4.62  | 0.000 | 0.000 |
|       |                                                         | 1,2-dipalmitoyl-GPC (16:0/16:0)                | 1.84  | 0.001 | 0.000 |
|       |                                                         | 1-palmitoyl-2-palmitoleoyl-GPC (16:0/16:1)*    | 1.45  | 0.009 | 0.005 |
|       |                                                         | 1-palmitoyl-2-stearoyl-GPC (16:0/18:0)         | 1.31  | 0.153 | 0.058 |
|       |                                                         | 1-palmitoyl-2-oleoyl-GPC (16:0/18:1)           | 1.82  | 0.000 | 0.000 |
|       |                                                         | 1-palmitoyl-2-arachidonoyl-GPC (16:0/20:4n6)   | 5.92  | 0.000 | 0.000 |
|       |                                                         | 1-palmitoyl-2-docosahexaenoyl-GPC (16:0/22:6)  | 2.98  | 0.000 | 0.000 |
|       |                                                         | 1-palmitoleoyl-2-linolenoyl-GPC (16:1/18:3)*   | 0.18  | 0.000 | 0.000 |
|       |                                                         | 1-stearoyl-2-oleoyl-GPC (18:0/18:1)            | 2.19  | 0.000 | 0.000 |
|       |                                                         | 1-stearoyl-2-linoleoyl-GPC (18:0/18:2)*        | 2.17  | 0.000 | 0.000 |
|       |                                                         | 1-stearoyl-2-arachidonoyl-GPC (18:0/20:4)      | 11.00 | 0.000 | 0.000 |
|       |                                                         | 1-stearoyl-2-docosahexaenoyl-GPC (18:0/22:6)   | 5.43  | 0.000 | 0.000 |
|       |                                                         | 1,2-dioleoyl-GPC (18:1/18:1)                   | 1.68  | 0.004 | 0.002 |
|       |                                                         | 1-oleoyl-2-docosahexaenoyl-GPC (18:1/22:6)*    | 2.91  | 0.000 | 0.000 |
|       |                                                         | 1,2-dilinoleoyl-GPC (18:2/18:2)                | 1.78  | 0.015 | 0.007 |
|       |                                                         | 1,2-dipalmitoyl-GPE (16:0/16:0)*               | 1.52  | 0.023 | 0.011 |
|       |                                                         | 1-palmitoyl-2-oleoyl-GPE (16:0/18:1)           | 1.03  | 0.987 | 0.291 |
|       |                                                         | 1-palmitoyl-2-arachidonoyl-GPE (16:0/20:4)*    | 2.00  | 0.001 | 0.001 |
|       |                                                         | 1-palmitoyl-2-docosahexaenoyl-GPE (16:0/22:6)* | 3.73  | 0.000 | 0.000 |

|                               |                                                        |       |       |       |
|-------------------------------|--------------------------------------------------------|-------|-------|-------|
| Phosphatidylethanolamine (PE) | 1-stearoyl-2-oleoyl-GPE (18:0/18:1)                    | 2.03  | 0.000 | 0.000 |
|                               | 1-stearoyl-2-arachidonoyl-GPE (18:0/20:4)              | 3.33  | 0.000 | 0.000 |
|                               | 1-oleoyl-2-linoleoyl-GPE (18:1/18:2)*                  | 1.31  | 0.051 | 0.022 |
|                               | 1-oleoyl-2-arachidonoyl-GPE (18:1/20:4)*               | 3.78  | 0.000 | 0.000 |
|                               | 1-oleoyl-2-docosahexaenoyl-GPE (18:1/22:6)*            | 5.98  | 0.000 | 0.000 |
| Phosphatidylserine (PS)       | 1-palmitoyl-2-oleoyl-GPS (16:0/18:1)                   | 0.86  | 0.221 | 0.080 |
|                               | 1-stearoyl-2-oleoyl-GPS (18:0/18:1)                    | 2.20  | 0.000 | 0.000 |
|                               | 1-stearoyl-2-arachidonoyl-GPS (18:0/20:4)              | 3.00  | 0.000 | 0.000 |
| Phosphatidylglycerol (PG)     | 1-palmitoyl-2-oleoyl-GPG (16:0/18:1)                   | 2.31  | 0.011 | 0.005 |
| Phosphatidylinositol (PI)     | 1-palmitoyl-2-oleoyl-GPI (16:0/18:1)*                  | 1.54  | 0.004 | 0.002 |
|                               | 1-palmitoyl-2-arachidonoyl-GPI (16:0/20:4)*            | 1.87  | 0.037 | 0.016 |
|                               | 1-stearoyl-2-oleoyl-GPI (18:0/18:1)*                   | 1.68  | 0.547 | 0.177 |
|                               | 1-stearoyl-2-arachidonoyl-GPI (18:0/20:4)              | 3.79  | 0.001 | 0.001 |
|                               | 1-oleoyl-2-arachidonoyl-GPI (18:1/20:4)*               | 3.18  | 0.000 | 0.000 |
| Lysophospholipid              | 1-palmitoyl-GPC (16:0)                                 | 1.38  | 0.057 | 0.024 |
|                               | 2-palmitoyl-GPC (16:0)*                                | 2.18  | 0.204 | 0.074 |
|                               | 1-palmitoleoyl-GPC (16:1)*                             | 1.07  | 0.585 | 0.186 |
|                               | 2-palmitoleoyl-GPC (16:1)*                             | 0.90  | 0.378 | 0.127 |
|                               | 1-stearoyl-GPC (18:0)                                  | 3.82  | 0.000 | 0.000 |
|                               | 1-oleoyl-GPC (18:1)                                    | 1.58  | 0.019 | 0.009 |
|                               | 1-lignoceroyl-GPC (24:0)                               | 1.13  | 0.738 | 0.228 |
|                               | 1-palmitoyl-GPE (16:0)                                 | 1.81  | 0.033 | 0.015 |
|                               | 1-stearoyl-GPE (18:0)                                  | 3.50  | 0.000 | 0.000 |
|                               | 2-stearoyl-GPE (18:0)*                                 | 3.40  | 0.063 | 0.026 |
|                               | 1-oleoyl-GPE (18:1)                                    | 2.54  | 0.000 | 0.000 |
|                               | 1-linoleoyl-GPE (18:2)*                                | 1.61  | 0.001 | 0.000 |
|                               | 1-arachidonoyl-GPE (20:4n6)*                           | 3.38  | 0.000 | 0.000 |
|                               | 1-palmitoyl-GPS (16:0)*                                | 0.40  | 0.376 | 0.127 |
|                               | 1-stearoyl-GPS (18:0)*                                 | 1.88  | 0.028 | 0.013 |
|                               | 1-oleoyl-GPS (18:1)                                    | 3.90  | 0.053 | 0.022 |
|                               | 1-palmitoyl-GPG (16:0)*                                | 1.15  | 0.737 | 0.228 |
|                               | 1-stearoyl-GPG (18:0)                                  | 0.66  | 0.573 | 0.183 |
|                               | 1-oleoyl-GPG (18:1)*                                   | 1.23  | 0.144 | 0.054 |
|                               | 1-palmitoyl-GPI (16:0)                                 | 12.57 | 0.004 | 0.002 |
|                               | 1-stearoyl-GPI (18:0)                                  | 6.07  | 0.026 | 0.012 |
|                               | 1-oleoyl-GPI (18:1)                                    | 9.62  | 0.000 | 0.000 |
|                               | 1-arachidonoyl-GPI (20:4)*                             | 47.22 | 0.000 | 0.000 |
| Plasmalogen                   | 1-(1-enyl-palmitoyl)-2-oleoyl-GPE (P-16:0/18:1)*       | 1.97  | 0.000 | 0.000 |
|                               | 1-(1-enyl-palmitoyl)-2-linoleoyl-GPE (P-16:0/18:2)*    | 1.56  | 0.004 | 0.002 |
|                               | 1-(1-enyl-palmitoyl)-2-palmitoyl-GPC (P-16:0/16:0)*    | 2.55  | 0.000 | 0.000 |
|                               | 1-(1-enyl-palmitoyl)-2-palmitoleoyl-GPC (P-16:0/16:1)* | 1.67  | 0.005 | 0.003 |
|                               | 1-(1-enyl-palmitoyl)-2-arachidonoyl-GPE (P-16:0/20:4)* | 2.79  | 0.000 | 0.000 |
|                               | 1-(1-enyl-palmitoyl)-2-oleoyl-GPC (P-16:0/18:1)*       | 1.60  | 0.011 | 0.006 |
|                               | 1-(1-enyl-stearoyl)-2-oleoyl-GPE (P-18:0/18:1)         | 2.07  | 0.006 | 0.004 |
|                               | 1-(1-enyl-palmitoyl)-2-arachidonoyl-GPC (P-16:0/20:4)* | 11.29 | 0.000 | 0.000 |
|                               | 1-(1-enyl-palmitoyl)-2-linoleoyl-GPC (P-16:0/18:2)*    | 1.16  | 0.642 | 0.201 |
|                               | 1-(1-enyl-stearoyl)-2-arachidonoyl-GPE (P-18:0/20:4)*  | 4.54  | 0.000 | 0.000 |
| Lysoplasmalogen               | 1-(1-enyl-palmitoyl)-GPC (P-16:0)*                     | 2.11  | 0.001 | 0.001 |
|                               | 1-(1-enyl-palmitoyl)-GPE (P-16:0)*                     | 4.81  | 0.000 | 0.000 |
|                               | 1-(1-enyl-oleoyl)-GPE (P-18:1)*                        | 6.81  | 0.000 | 0.000 |
|                               | 1-(1-enyl-stearoyl)-GPE (P-18:0)*                      | 5.38  | 0.000 | 0.000 |
| Glycerolipid Metabolism       | glycerol                                               | 0.81  | 0.033 | 0.015 |
|                               | glycerol 3-phosphate                                   | 5.10  | 0.000 | 0.000 |
|                               | glycerophosphoglycerol                                 | 0.96  | 0.714 | 0.222 |
| Monoacylglycerol              | 1-myristoylglycerol (14:0)                             | 4.70  | 0.013 | 0.006 |
|                               | 1-pentadecanoylglycerol (15:0)                         | 4.81  | 0.004 | 0.002 |
|                               | 1-palmitoylglycerol (16:0)                             | 3.16  | 0.052 | 0.022 |
|                               | 1-palmitoleoylglycerol (16:1)*                         | 4.74  | 0.044 | 0.019 |
|                               | 1-margaroylglycerol (17:0)                             | 4.54  | 0.011 | 0.006 |
|                               | 1-oleoylglycerol (18:1)                                | 6.97  | 0.016 | 0.008 |
|                               | 1-linoleoylglycerol (18:2)                             | 11.77 | 0.002 | 0.002 |
|                               | 1-dihomo-linolenylglycerol (20:3)                      | 26.02 | 0.002 | 0.001 |
|                               | 1-arachidonoylglycerol (20:4)                          | 48.16 | 0.000 | 0.000 |
|                               | 1-docosahexaenoylglycerol (22:6)                       | 21.85 | 0.002 | 0.002 |
|                               | 2-myristoylglycerol (14:0)                             | 4.22  | 0.028 | 0.013 |
|                               | 2-palmitoylglycerol (16:0)                             | 3.66  | 0.486 | 0.159 |
|                               | 2-palmitoleoylglycerol (16:1)*                         | 5.12  | 0.035 | 0.015 |
|                               | 2-oleoylglycerol (18:1)                                | 6.46  | 0.020 | 0.009 |
|                               | 2-linoleoylglycerol (18:2)                             | 14.44 | 0.005 | 0.003 |
|                               | 2-arachidonoylglycerol (20:4)                          | 35.09 | 0.001 | 0.001 |
|                               | 2-docosahexaenoylglycerol (22:6)*                      | 17.97 | 0.003 | 0.002 |
|                               | 1-heptadecenoylglycerol (17:1)*                        | 6.26  | 0.021 | 0.010 |
|                               | 2-heptadecenoylglycerol (17:1)*                        | 7.95  | 0.010 | 0.005 |
| Diacylglycerol                | palmitoyl-oleoyl-glycerol (16:0/18:1) [2]*             | 0.21  | 0.000 | 0.000 |
|                               | oleoyl-arachidonoyl-glycerol (18:1/20:4) [2]*          | 4.97  | 0.088 | 0.035 |
| Galactosyl Glycerolipids      | galactosylglycerol                                     | 0.12  | 0.000 | 0.000 |
| Sphingolipid Synthesis        | 3-ketosphinganine                                      | 0.93  | 0.438 | 0.145 |
|                               | sphinganine                                            | 0.93  | 0.773 | 0.237 |
|                               | sphingadienine                                         | 6.26  | 0.000 | 0.000 |
|                               | phytosphingosine                                       | 0.74  | 0.102 | 0.040 |
| Dihydroceramides              | N-palmitoyl-sphinganine (d18:0/16:0)                   | 0.72  | 0.297 | 0.103 |
|                               | N-stearoyl-sphinganine (d18:0/18:0)*                   | 1.12  | 0.944 | 0.282 |
|                               | N-palmitoyl-sphingosine (d18:1/16:0)                   | 1.21  | 0.569 | 0.183 |
| Ceramides                     | N-stearoyl-sphingosine (d18:1/18:0)*                   | 2.69  | 0.002 | 0.001 |
|                               | N-palmitoyl-sphingadienine (d18:2/16:0)*               | 1.07  | 0.930 | 0.279 |
|                               | ceramide (d18:1/14:0, d16:1/16:0)*                     | 0.85  | 0.280 | 0.098 |

|  |                                                      |                                                     |       |       |       |
|--|------------------------------------------------------|-----------------------------------------------------|-------|-------|-------|
|  |                                                      | ceramide (d18:1/17:0, d17:1/18:0)*                  | 2.10  | 0.083 | 0.034 |
|  |                                                      | ceramide (d16:1/24:1, d18:1/22:1)*                  | 0.66  | 0.168 | 0.063 |
|  |                                                      | ceramide (d18:2/24:1, d18:1/24:2)*                  | 1.43  | 0.281 | 0.098 |
|  | Hexosylceramides (HCER)                              | glycosyl-N-stearoyl-sphinganine (d18:0/18:0)*       | 4.95  | 0.016 | 0.008 |
|  |                                                      | glycosyl-N-palmitoyl-sphingosine (d18:1/16:0)       | 1.05  | 0.847 | 0.258 |
|  |                                                      | glycosyl-N-stearoyl-sphingosine (d18:1/18:0)        | 3.32  | 0.001 | 0.001 |
|  |                                                      | glycosyl-N-behenoyl-sphingadienine (d18:2/22:0)*    | 1.79  | 0.077 | 0.031 |
|  |                                                      | glycosyl ceramide (d18:1/20:0, d16:1/22:0)*         | 7.63  | 0.000 | 0.000 |
|  |                                                      | glycosyl ceramide (d16:1/24:1, d18:1/22:1)*         | 1.77  | 0.112 | 0.044 |
|  |                                                      | glycosyl ceramide (d18:1/23:1, d17:1/24:1)*         | 1.87  | 0.091 | 0.036 |
|  |                                                      | glycosyl ceramide (d18:2/24:1, d18:1/24:2)*         | 1.82  | 0.030 | 0.014 |
|  | Lactosylceramides (LCER)                             | lactosyl-N-palmitoyl-sphingosine (d18:1/16:0)       | 1.93  | 0.000 | 0.000 |
|  |                                                      | lactosyl-N-stearoyl-sphingosine (d18:1/18:0)*       | 4.49  | 0.000 | 0.000 |
|  |                                                      | lactosyl-N-behenoyl-sphingosine (d18:1/22:0)*       | 3.90  | 0.000 | 0.000 |
|  |                                                      | lactosyl-N-nervonoyl-sphingosine (d18:1/24:1)*      | 3.33  | 0.000 | 0.000 |
|  | Dihydrosphingomyelins                                | myristoyl dihydrosphingomyelin (d18:0/14:0)*        | 1.49  | 0.092 | 0.036 |
|  |                                                      | palmitoyl dihydrosphingomyelin (d18:0/16:0)*        | 2.16  | 0.005 | 0.003 |
|  |                                                      | behenoyl dihydrosphingomyelin (d18:0/22:0)*         | 2.09  | 0.063 | 0.026 |
|  |                                                      | sphingomyelin (d18:0/18:0, d19:0/17:0)*             | 3.82  | 0.001 | 0.001 |
|  |                                                      | sphingomyelin (d18:0/20:0, d16:0/22:0)*             | 2.29  | 0.009 | 0.005 |
|  |                                                      | palmitoyl sphingomyelin (d18:1/16:0)                | 2.26  | 0.000 | 0.000 |
|  | Sphingomyelins                                       | stearoyl sphingomyelin (d18:1/18:0)                 | 4.80  | 0.000 | 0.000 |
|  |                                                      | behenoyl sphingomyelin (d18:1/22:0)*                | 2.29  | 0.015 | 0.008 |
|  |                                                      | tricosanoyl sphingomyelin (d18:1/23:0)*             | 1.97  | 0.021 | 0.010 |
|  |                                                      | lignoceroyl sphingomyelin (d18:1/24:0)              | 2.51  | 0.007 | 0.004 |
|  |                                                      | sphingomyelin (d18:2/23:1)*                         | 2.03  | 0.007 | 0.004 |
|  |                                                      | sphingomyelin (d18:2/24:2)*                         | 1.56  | 0.069 | 0.028 |
|  |                                                      | sphingomyelin (d17:1/14:0, d16:1/15:0)*             | 0.45  | 0.001 | 0.000 |
|  |                                                      | sphingomyelin (d18:1/14:0, d16:1/16:0)*             | 1.09  | 0.763 | 0.234 |
|  |                                                      | sphingomyelin (d18:2/14:0, d18:1/14:1)*             | 0.48  | 0.001 | 0.000 |
|  |                                                      | sphingomyelin (d17:1/16:0, d18:1/15:0, d16:1/17:0)* | 1.20  | 0.433 | 0.144 |
|  |                                                      | sphingomyelin (d17:2/16:0, d18:2/15:0)*             | 1.05  | 0.859 | 0.261 |
|  |                                                      | sphingomyelin (d18:2/16:0, d18:1/16:1)*             | 1.10  | 0.719 | 0.223 |
|  |                                                      | sphingomyelin (d18:1/17:0, d17:1/18:0, d19:1/16:0)  | 3.91  | 0.000 | 0.000 |
|  |                                                      | sphingomyelin (d18:1/18:1, d18:2/18:0)              | 2.97  | 0.000 | 0.000 |
|  |                                                      | sphingomyelin (d18:1/20:0, d16:1/22:0)*             | 5.36  | 0.000 | 0.000 |
|  |                                                      | sphingomyelin (d18:1/21:0, d17:1/22:0, d16:1/23:0)* | 2.23  | 0.015 | 0.007 |
|  |                                                      | sphingomyelin (d18:1/22:1, d18:2/22:0, d16:1/24:1)* | 1.89  | 0.007 | 0.004 |
|  |                                                      | sphingomyelin (d18:1/22:2, d18:2/22:1, d16:1/24:2)* | 1.84  | 0.135 | 0.052 |
|  |                                                      | sphingomyelin (d18:2/23:0, d18:1/23:1, d17:1/24:1)* | 2.26  | 0.008 | 0.004 |
|  |                                                      | sphingomyelin (d18:1/24:1, d18:2/24:0)*             | 2.57  | 0.002 | 0.001 |
|  | Sphingosines                                         | sphingomyelin (d18:2/24:1, d18:1/24:2)*             | 2.15  | 0.001 | 0.001 |
|  |                                                      | sphingosine                                         | 2.72  | 0.002 | 0.001 |
|  |                                                      | sphingosine 1-phosphate                             | 1.07  | 0.749 | 0.231 |
|  |                                                      | hexadecaspingosine (d16:1)*                         | 2.57  | 0.010 | 0.005 |
|  |                                                      | heptadecaspingosine (d17:1)                         | 2.40  | 0.009 | 0.005 |
|  | Mevalonate Metabolism                                | eicosanoylsphingosine (d20:1)*                      | 1.37  | 0.362 | 0.123 |
|  |                                                      | 3-hydroxy-3-methylglutarate                         | 0.22  | 0.000 | 0.000 |
|  | Sterol                                               | cholesterol                                         | 1.16  | 0.138 | 0.053 |
|  |                                                      | 7-dehydrocholesterol                                | 3.86  | 0.000 | 0.000 |
|  |                                                      | 4-cholesten-3-one                                   | 1.65  | 0.341 | 0.117 |
|  |                                                      | beta-sitosterol                                     | 1.00  | 1.000 | 0.291 |
|  |                                                      | campesterol                                         | 0.94  | 0.826 | 0.252 |
|  |                                                      | 7-hydroxycholesterol (alpha or beta)                | 1.99  | 0.003 | 0.002 |
|  | Primary Bile Acid Metabolism                         | glycochenodeoxycholate                              | 1.00  | 1.000 | 0.291 |
|  |                                                      | taurochenodeoxycholate                              | 1.00  | 1.000 | 0.291 |
|  | Secondary Bile Acid Metabolism                       | glycodeoxycholate                                   | 1.00  | 1.000 | 0.291 |
|  |                                                      |                                                     |       |       |       |
|  | Purine Metabolism, (Hypo)Xanthine/Inosine containing | AICA ribonucleotide                                 | 0.19  | 0.000 | 0.000 |
|  |                                                      | inosine 5'-monophosphate (IMP)                      | 1.95  | 0.025 | 0.012 |
|  |                                                      | inosine                                             | 1.57  | 0.016 | 0.008 |
|  |                                                      | hypoxanthine                                        | 0.97  | 0.984 | 0.291 |
|  |                                                      | xanthine                                            | 1.00  | 0.874 | 0.265 |
|  |                                                      | xanthosine                                          | 2.07  | 0.008 | 0.004 |
|  |                                                      | N1-methylinosine                                    | 13.48 | 0.000 | 0.000 |
|  |                                                      | 2'-deoxyinosine                                     | 0.19  | 0.000 | 0.000 |
|  |                                                      | urate                                               | 1.21  | 0.365 | 0.124 |
|  |                                                      | allantoin                                           | 0.94  | 0.394 | 0.132 |
|  | Purine Metabolism, Adenine containing                | adenosine 5'-triphosphate (ATP)                     | 11.90 | 0.000 | 0.000 |
|  |                                                      | adenosine 5'-diphosphate (ADP)                      | 2.21  | 0.004 | 0.002 |
|  |                                                      | adenosine 5'-monophosphate (AMP)                    | 0.61  | 0.003 | 0.002 |
|  |                                                      | adenosine 3',5'-cyclic monophosphate (cAMP)         | 0.38  | 0.000 | 0.000 |
|  |                                                      | adenylosuccinate                                    | 0.19  | 0.000 | 0.000 |
|  |                                                      | adenosine                                           | 0.86  | 0.626 | 0.197 |
|  |                                                      | adenine                                             | 0.50  | 0.000 | 0.000 |
|  |                                                      | N1-methyladenosine                                  | 4.12  | 0.000 | 0.000 |
|  |                                                      | N6-methyladenosine                                  | 1.29  | 0.560 | 0.180 |
|  |                                                      | N6-carbamoylthreonyladenosine                       | 1.54  | 0.000 | 0.000 |
|  | Purine Metabolism, Guanine containing                | 2'-deoxyadenosine 5'-diphosphate                    | 0.58  | 0.008 | 0.004 |
|  |                                                      | 2'-deoxyadenosine 5'-monophosphate                  | 0.03  | 0.000 | 0.000 |
|  |                                                      | 2'-deoxyadenosine                                   | 0.47  | 0.005 | 0.003 |
|  |                                                      | diadenosine triphosphate                            | 1.08  | 0.600 | 0.190 |
|  |                                                      | N6-succinyladenosine                                | 0.93  | 0.621 | 0.195 |
|  |                                                      | guanosine 5'- diphosphate (GDP)                     | 9.15  | 0.000 | 0.000 |
|  |                                                      | guanosine 5'- monophosphate (5'-GMP)                | 0.73  | 0.017 | 0.008 |
|  |                                                      | guanosine                                           | 2.12  | 0.001 | 0.000 |
|  |                                                      | guanine                                             | 1.19  | 0.250 | 0.089 |
|  |                                                      |                                                     |       |       |       |

|                        |                                            |                                                             |       |       |       |
|------------------------|--------------------------------------------|-------------------------------------------------------------|-------|-------|-------|
| Nucleotide             | Purine Metabolism, Guanine containing      | 7-methylguanine                                             | 1.09  | 0.317 | 0.110 |
|                        |                                            | N2-methylguanosine                                          | 2.41  | 0.000 | 0.000 |
|                        |                                            | N2,N2-dimethylguanosine                                     | 1.93  | 0.000 | 0.000 |
|                        |                                            | 2'-deoxyguanosine                                           | 0.48  | 0.002 | 0.002 |
|                        | Pyrimidine Metabolism, Orotate containing  | dihydroorotate                                              | 0.16  | 0.003 | 0.002 |
|                        |                                            | orotate                                                     | 0.03  | 0.000 | 0.000 |
|                        |                                            | orotidine                                                   | 0.04  | 0.000 | 0.000 |
|                        | Pyrimidine Metabolism, Uracil containing   | uridine 5'-triphosphate (UTP)                               | 12.44 | 0.000 | 0.000 |
|                        |                                            | uridine 5'-diphosphate (UDP)                                | 3.30  | 0.001 | 0.001 |
|                        |                                            | uridine 5'-monophosphate (UMP)                              | 0.73  | 0.076 | 0.031 |
|                        |                                            | uridine 3'-monophosphate (3'-UMP)                           | 3.89  | 0.001 | 0.001 |
|                        |                                            | uridine                                                     | 1.20  | 0.113 | 0.044 |
|                        |                                            | uracil                                                      | 0.40  | 0.003 | 0.002 |
|                        |                                            | pseudouridine                                               | 1.97  | 0.000 | 0.000 |
|                        |                                            | 5,6-dihydrouridine                                          | 2.52  | 0.000 | 0.000 |
|                        |                                            | 2'-O-methyluridine                                          | 1.94  | 0.000 | 0.000 |
|                        |                                            | 5-methyluridine (ribothymidine)                             | 0.47  | 0.002 | 0.002 |
|                        |                                            | 2'-deoxyuridine                                             | 7.77  | 0.000 | 0.000 |
|                        |                                            | 3-ureidopropionate                                          | 0.49  | 0.000 | 0.000 |
|                        |                                            | beta-alanine                                                | 0.19  | 0.000 | 0.000 |
|                        |                                            | 3-(3-amino-3-carboxypropyl)uridine*                         | 0.78  | 0.004 | 0.003 |
|                        |                                            | cytidine triphosphate                                       | 20.20 | 0.000 | 0.000 |
| Cofactors and Vitamins | Pyrimidine Metabolism, Cytidine containing | cytidine diphosphate                                        | 4.18  | 0.000 | 0.000 |
|                        |                                            | cytidine 5'-monophosphate (5'-CMP)                          | 0.61  | 0.000 | 0.000 |
|                        |                                            | cytidine                                                    | 2.26  | 0.000 | 0.000 |
|                        |                                            | cytosine                                                    | 5.58  | 0.000 | 0.000 |
|                        |                                            | 3-methylcytidine                                            | 4.62  | 0.000 | 0.000 |
|                        |                                            | 5-methylcytidine                                            | 1.12  | 0.154 | 0.058 |
|                        |                                            | 2'-deoxycytidine 5'-monophosphate                           | 0.19  | 0.000 | 0.000 |
|                        |                                            | 2'-deoxycytidine                                            | 0.24  | 0.000 | 0.000 |
|                        |                                            | 2'-O-methylcytidine                                         | 6.39  | 0.000 | 0.000 |
|                        | Pyrimidine Metabolism, Thymine containing  | thymidine 5'-monophosphate                                  | 0.09  | 0.000 | 0.000 |
|                        |                                            | thymidine                                                   | 1.03  | 0.972 | 0.289 |
|                        |                                            | thymine                                                     | 0.55  | 0.008 | 0.004 |
|                        |                                            | 5,6-dihydrothymine                                          | 0.91  | 0.006 | 0.004 |
|                        |                                            | 3-aminoisobutyrate                                          | 2.31  | 0.000 | 0.000 |
|                        | Purine and Pyrimidine Metabolism           | methylphosphate                                             | 1.50  | 0.041 | 0.018 |
|                        | Nicotinate and Nicotinamide Metabolism     | quinolinate                                                 | 0.79  | 0.506 | 0.165 |
|                        |                                            | nicotinamide                                                | 2.00  | 0.000 | 0.000 |
|                        |                                            | nicotinamide ribonucleotide (NMN)                           | 1.61  | 0.022 | 0.010 |
|                        |                                            | nicotinamide riboside                                       | 2.32  | 0.000 | 0.000 |
|                        |                                            | nicotinamide adenine dinucleotide (NAD+)                    | 0.84  | 0.036 | 0.016 |
|                        |                                            | nicotinamide adenine dinucleotide reduced (NADH)            | 0.42  | 0.001 | 0.001 |
|                        |                                            | nicotinamide adenine dinucleotide phosphate reduced (NADPH) | 5.37  | 0.001 | 0.001 |
|                        |                                            | 1-methylnicotinamide                                        | 1.98  | 0.000 | 0.000 |
|                        |                                            | trigonelline (N'-methylnicotinate)                          | 0.87  | 0.248 | 0.088 |
|                        |                                            | adenosine 5'-diphosphoribose (ADP-ribose)                   | 9.84  | 0.000 | 0.000 |
|                        | Riboflavin Metabolism                      | riboflavin (Vitamin B2)                                     | 1.14  | 0.071 | 0.029 |
|                        | Pantothenate and CoA Metabolism            | flavin adenine dinucleotide (FAD)                           | 1.40  | 0.002 | 0.001 |
|                        |                                            | flavin mononucleotide (FMN)                                 | 0.89  | 0.275 | 0.096 |
|                        |                                            | pantoate                                                    | 1.50  | 0.008 | 0.005 |
|                        |                                            | pantothenate                                                | 1.38  | 0.003 | 0.002 |
|                        |                                            | pantetheine                                                 | 3.29  | 0.000 | 0.000 |
|                        |                                            | phosphopantetheine                                          | 1.21  | 0.226 | 0.082 |
|                        | Ascorbate and Aldarate Metabolism          | 3'-dephosphocoenzyme A                                      | 1.94  | 0.017 | 0.008 |
|                        |                                            | coenzyme A                                                  | 1.22  | 0.198 | 0.072 |
|                        |                                            | 2-O-methylascorbic acid                                     | 1.87  | 0.000 | 0.000 |
|                        |                                            | threonate                                                   | 1.37  | 0.012 | 0.006 |
|                        | Tocopherol Metabolism                      | gulonate*                                                   | 0.07  | 0.000 | 0.000 |
|                        |                                            | alpha-tocopherol                                            | 0.95  | 0.580 | 0.185 |
|                        | Biotin Metabolism                          | biotin                                                      | 0.73  | 0.268 | 0.094 |
|                        | Folate Metabolism                          | folate                                                      | 1.00  | 1.000 | 0.291 |
|                        |                                            | 5-methyltetrahydrofolate (5MeTHF)                           | 0.35  | 0.000 | 0.000 |
|                        | Pterin Metabolism                          | pterin                                                      | 2.01  | 0.023 | 0.011 |
|                        | Hemoglobin and Porphyrin Metabolism        | bilirubin (Z,Z)                                             | 0.52  | 0.007 | 0.004 |
|                        |                                            | thiamin (Vitamin B1)                                        | 3.69  | 0.000 | 0.000 |
|                        | Thiamine Metabolism                        | thiamin monophosphate                                       | 20.97 | 0.000 | 0.000 |
|                        |                                            | thiamin diphosphate                                         | 1.84  | 0.052 | 0.022 |
|                        |                                            | 5-(2-Hydroxyethyl)-4-methylthiazole                         | 3.55  | 0.000 | 0.000 |
|                        | Vitamin A Metabolism                       | retinol (Vitamin A)                                         | 7.71  | 0.000 | 0.000 |
|                        | Vitamin B6 Metabolism                      | pyridoxine (Vitamin B6)                                     | 1.30  | 0.030 | 0.014 |
|                        |                                            | pyridoxamine                                                | 1.80  | 0.002 | 0.001 |
|                        |                                            | pyridoxamine phosphate                                      | 1.93  | 0.000 | 0.000 |
|                        |                                            | pyridoxal phosphate                                         | 1.01  | 0.980 | 0.291 |
|                        |                                            | pyridoxal                                                   | 1.52  | 0.001 | 0.001 |
|                        |                                            | pyridoxate                                                  | 5.33  | 0.000 | 0.000 |
| Benzoate Metabolism    | Benzoate Metabolism                        | hippurate                                                   | 3.92  | 0.000 | 0.000 |
|                        |                                            | 3-hydroxyhippurate                                          | 3.72  | 0.005 | 0.003 |
|                        |                                            | benzoate                                                    | 1.38  | 0.244 | 0.087 |
|                        |                                            | catechol sulfate                                            | 3.05  | 0.001 | 0.001 |
|                        |                                            | guaiacol sulfate                                            | 1.44  | 0.113 | 0.044 |
|                        |                                            | 4-methylcatechol sulfate                                    | 3.24  | 0.000 | 0.000 |
|                        |                                            | p-cresol sulfate                                            | 3.65  | 0.000 | 0.000 |
|                        |                                            | 3-formylindole                                              | 1.61  | 0.013 | 0.006 |
|                        |                                            | gluconate                                                   | 5.99  | 0.000 | 0.000 |
|                        |                                            | beta-guanidinopropanoate                                    | 0.57  | 0.003 | 0.002 |



|             |                      |                                                             |      |       |       |
|-------------|----------------------|-------------------------------------------------------------|------|-------|-------|
| Xenobiotics | Food Component/Plant | ergothioneine                                               | 0.80 | 0.140 | 0.053 |
|             |                      | erythritol                                                  | 0.55 | 0.000 | 0.000 |
|             |                      | homostachydrine*                                            | 0.46 | 0.000 | 0.000 |
|             |                      | mannonate*                                                  | 0.74 | 0.008 | 0.004 |
|             |                      | stachydrine                                                 | 0.57 | 0.000 | 0.000 |
|             |                      | methyl glucopyranoside (alpha + beta)                       | 6.36 | 0.000 | 0.000 |
|             |                      | ethyl beta-glucopyranoside                                  | 1.00 | 0.942 | 0.281 |
|             |                      | 2-aminophenol sulfate                                       | 0.28 | 0.000 | 0.000 |
|             | Drug - Antibiotic    | penicillin G                                                | 3.43 | 0.000 | 0.000 |
|             | Chemical             | sulfate*                                                    | 6.30 | 0.000 | 0.000 |
|             |                      | O-sulfo-L-tyrosine                                          | 0.65 | 0.000 | 0.000 |
|             |                      | 2,4-di-tert-butylphenol                                     | 1.29 | 0.394 | 0.132 |
|             |                      | phenol red                                                  | 2.69 | 0.000 | 0.000 |
|             |                      | thioprolone                                                 | 1.63 | 0.000 | 0.000 |
|             |                      | 4-chlorobenzoic acid                                        | 2.19 | 0.020 | 0.009 |
|             |                      | branched-chain, straight-chain, or cyclopropyl 12:1 fatty a | 1.35 | 0.318 | 0.110 |
